# Supplementary material
Source: publisher figshare collection journal article supplement (https://geolsoc.figshare.com/ndownloader/files/10331637)
Supplement: Supplementary file 1 [file 10331637]

## Sheet: Table of Contents
Supplemetary Tables to Precambrian olistoliths masquerading as sills from Death Valley, California Vandyk, T. M., Le Heron, D.P., Chew, D.M., Amato., J.M., Thirlwall, M., Dehler, C.M., Hennig, J., Castonguay, S.R., Knott T., Tofaif, S., Ali, D.O., Manning, C.J.,Busfield, M.E, Doepke, D. , Grassineau, N.
Table	Description
S1	LA-ICPMS apatite, including standards
S2	LA-ICPMS metabasite zircon, including standards
S3	LA-ICPMS detrital zircon, including standards
S4	LA-ICPMS summary of published and measured ages of standards
S5	XRF (Major Elements) in-session standards
S6	XRF (Major Elements) 2σ determination by multiple standard runs
S7	XRF (Trace Elements) 2σ determination by multiple basaltic sample runs
S8	ICP-AES, including standards
S9	ICP-MS, including standards
S10	ICP-MS and ICP-MS (Major Elements) 2σ determination by multiple standard runs
S11	ICP-MS and ICP-MS (Trace Elements) 2σ determination by multiple standard runs
References

## Sheet: Table S1
Table S1: Isotopic age data, including standards, for U-Pb apatite by Laser Ablation Inductively Coupled Mass Spectrometry of metabasites from the Kingston Peak Formation in the Silurian Hills and Kingston Range, Death Valley, USA.
	Isotopic ratios										Age/Ma								Concentrations
Sample-Grain	207Pb/235U	2σ	206Pb/238U	2σ	Error Corr.	238U/206Pb	2σ	207Pb/206Pb	2σ	Error Corr.	206Pb/238U	2σ	207Pb/235U	2σ	207Pb/206Pb	2σ	207Pb corr age	2σ	Approx. U/ppm	Th/U
SH3B (Silurian Hills metabasite body)
SH3B-0	75.7	1.6	0.7116	0.0081	0.510672	1.411	0.016	0.77	0.014	0.0301424	3464.49	39.4356	4406.66	93.1395	4867.23	88.4951	561.682	83.916	1.685	4.46628
SH3B-1	84.6	1.5	0.75	0.0093	0.724743	1.336	0.016	0.818	0.01	-0.0734109	3607.52	44.7332	4518.14	80.1088	4953.4	60.5551	176.817	76.4768	1.661	3.57654
SH3B-2	73.2	3.8	0.66	0.031	0.933278	1.608	0.08	0.802	0.015	0.0698987	3267.16	153.457	4373.02	227.014	4925.29	92.1189	267.752	88.0129	1.977	5.05306
SH3B-3	97.5	3.1	0.837	0.013	0.630441	1.2	0.018	0.837	0.021	-0.207823	3920.28	60.8885	4660.67	148.185	4986.04	125.098	-6.0277	154.488	1.571	6.2422
SH3B-4	106	3.6	0.895	0.022	0.682798	1.13	0.028	0.845	0.021	0.0634756	4120.67	101.29	4744.71	161.141	4999.54	124.249	-112.005	168.707	1.231	3.89864
SH3B-5	106.3	2.7	0.917	0.013	0.58957	1.089	0.015	0.828	0.017	-0.0599113	4195.08	59.4722	4747.55	120.587	4970.68	102.055	120.481	138.241	1.361	4.27533
SH3B-6	58.5	1.4	0.5744	0.0075	0.691367	1.74	0.023	0.737	0.013	-0.186266	2925.86	38.2033	4148.83	99.2883	4804.6	84.7487	607.734	63.0899	2.117	4.92368
SH3B-7	97.3	3.4	0.844	0.021	0.666555	1.202	0.029	0.843	0.022	0.0334377	3944.8	98.1526	4658.6	162.788	4996.18	130.387	-78.8535	164.588	1.298	4.12371
SH3B-8	99.5	1.9	0.866	0.011	0.59287	1.159	0.015	0.842	0.013	0.10319	4021.25	51.0783	4681.08	89.3874	4994.49	77.1121	-68.5719	110.804	1.423	2.74574
SH3B-9	122.7	3.6	1.042	0.017	0.637669	0.955	0.016	0.836	0.019	-0.08352	4602.29	75.0853	4891.97	143.53	4984.34	113.28	24.2809	175.411	1.264	3.34784
SH3B-10	60.39	0.96	0.6008	0.0079	0.651288	1.665	0.022	0.7349	0.0091	0.229853	3033.06	39.8821	4180.58	66.4574	4800.52	59.443	657.62	51.3995	1.556	4.13565
SH3B-11	89.9	3.3	0.813	0.029	0.91962	1.259	0.045	0.825	0.012	0.13625	3835.51	136.814	4579.13	168.088	4965.52	72.2257	127.028	94.3906	1.164	3.95101
SH3B-12	92.3	1.9	0.805	0.011	0.722367	1.247	0.018	0.84	0.012	-0.0274083	3807	52.0211	4605.59	94.8064	4991.12	71.3017	-40.4278	96.9192	1.615	5.39084
SH3B-13	46	2.6	0.505	0.014	0.700642	1.995	0.056	0.666	0.028	-0.270835	2635.25	73.0564	3909.37	220.965	4659.05	195.876	845.811	104.64	1.785	4.329
SH3B-14	22.52	0.54	0.3542	0.0046	0.517059	2.829	0.036	0.4578	0.0094	0.0163812	1954.62	25.3847	3206.43	76.8859	4110.75	84.4059	1146.41	28.3814	2.101	4.46628
SH3B-15	91.3	3.3	0.778	0.014	0.572306	1.292	0.023	0.84	0.025	-0.0979144	3709.84	66.7581	4594.65	166.072	4991.12	148.545	-39.1156	168.61	1.777	4.47227
SH3B-16	74.3	3	0.653	0.021	0.782448	1.549	0.048	0.835	0.021	-0.0240866	3239.92	104.193	4387.96	177.172	4982.64	125.312	7.9606	120.247	1.822	5.37346
SH3B-17	79.5	2	0.728	0.012	0.709152	1.369	0.022	0.787	0.014	-0.10177	3525.96	58.1202	4455.76	112.095	4898.39	87.1378	439.766	88.2291	1.57	4.73261
SH3B-18	69.7	2.2	0.611	0.017	0.795372	1.64	0.047	0.828	0.016	0.179166	3074.01	85.5288	4323.95	136.481	4970.68	96.0518	57.1982	88.8829	2.124	4.18585
SH3B-20	98.7	2	0.864	0.012	0.638451	1.161	0.017	0.832	0.013	0.104765	4014.34	55.7547	4672.96	94.6902	4977.53	77.7739	57.1056	107.585	1.657	5.29661
SH3B-21	96.1	1.7	0.863	0.013	0.721949	1.159	0.017	0.803	0.01	0.156838	4010.88	60.4189	4646.13	82.1896	4927.07	61.3582	399.327	84.0062	1.422	4.11862
SH3B-23	98.8	2.1	0.867	0.011	0.675723	1.152	0.014	0.825	0.013	-0.145658	4024.71	51.0632	4673.98	99.3457	4965.52	78.2446	143.626	105.983	1.592	4.02091
SH3B-24	72.2	1.7	0.629	0.013	0.829342	1.59	0.033	0.833	0.011	0.0925623	3145.63	65.0131	4359.24	102.641	4979.23	65.7522	22.3156	70.5294	2.1	4.67727
SH3B-25	111.5	1.9	0.979	0.013	0.571594	1.021	0.013	0.832	0.012	0.217189	4400.27	58.4305	4795.61	81.7189	4977.53	71.7913	78.6034	114.808	1.345	5.09944
SH3B-26	125.5	3.3	1.104	0.02	0.629882	0.907	0.017	0.83	0.017	0.103408	4795.1	86.8678	4914.7	129.231	4974.11	101.879	149.595	165.485	1.21	3.99042
SH3B-27	94.1	1.7	0.819	0.011	0.554225	1.222	0.016	0.843	0.013	0.205209	3856.81	51.8008	4625	83.5547	4996.18	77.0467	-75.9444	105.001	1.587	4.17188
SH3B-28	91.5	2.2	0.785	0.011	0.537126	1.274	0.017	0.837	0.017	0.0230213	3735.17	52.34	4596.85	110.525	4986.04	101.27	-7.22781	121.501	1.618	4.05351
SH3B-29	78.9	2.7	0.668	0.013	0.597986	1.499	0.028	0.838	0.023	-0.0671344	3298.15	64.1855	4448.17	152.219	4987.73	136.895	-16.4449	133.85	1.829	4.31593
SH3B-30	38.8	1.2	0.4691	0.0069	0.415543	2.135	0.031	0.603	0.017	0.059981	2479.61	36.4727	3740.54	115.687	4515.24	127.295	1025.46	59.4623	1.695	4.03714
SH3B-31	81	1.5	0.7053	0.0086	0.624616	1.418	0.017	0.829	0.012	0.0297548	3440.72	41.954	4474.51	82.8613	4972.39	71.9768	63.5756	82.931	1.815	4.46628
SH3B-32	55.37	0.68	0.4936	0.0061	0.579651	2.031	0.024	0.8233	0.0093	0.436063	2586.23	31.9611	4093.96	50.278	4962.59	56.0574	66.8425	49.4066	2.852	4.67071
SH3B-33	111.5	2.3	0.969	0.017	0.730502	1.04	0.018	0.839	0.012	0.158795	4367.61	76.6248	4795.61	98.9228	4989.43	71.3625	-30.4444	116.297	1.24	3.64166
SH3B-34	106.7	2	0.923	0.016	0.63624	1.091	0.018	0.842	0.013	0.312563	4215.22	73.07	4751.33	89.0596	4994.49	77.1121	-73.4856	118.171	1.049	4.34594
SH3B-35	89.2	2.7	0.774	0.023	0.955151	1.341	0.044	0.8334	0.0075	0.40869	3695.32	109.809	4571.28	138.368	4979.92	44.8157	30.0672	70.3887	1.767	4.29553
SH3B-36	65.32	0.96	0.5667	0.0064	0.621231	1.769	0.02	0.8363	0.0098	0.185461	2894.26	32.6861	4259.02	62.5942	4984.85	58.4139	-2.97739	59.6255	2.266	4.41112
SH3B-37	88.7	1.2	0.78	0.01	0.682645	1.285	0.017	0.8273	0.0087	0.368677	3717.09	47.655	4565.64	61.7674	4969.48	52.2597	94.0918	75.0398	1.83	4.92368
SH3B-38	64.2	1.1	0.6334	0.0089	0.68814	1.582	0.023	0.736	0.0093	0.210831	3163.02	44.4441	4241.72	72.6775	4802.66	60.6858	699.04	54.669	1.589	4.7619
SH3B-39	101	1.4	0.9071	0.0091	0.530916	1.105	0.011	0.8135	0.0098	0.217151	4161.7	41.7501	4696.12	65.0947	4945.56	59.5777	305.268	89.0323	1.473	3.90625
SH3B-40	61.6	1.5	0.539	0.0083	0.606531	1.869	0.03	0.826	0.016	0.064175	2779.26	42.7975	4200.4	102.283	4967.24	96.2178	59.3686	78.3373	2.615	4.94805
SH3B-41	112.7	3	0.983	0.019	0.782355	1.023	0.019	0.841	0.014	-0.139922	4413.29	85.3026	4806.38	127.943	4992.81	83.1145	-62.1206	132.366	1.53	4.17014
SH3B-42	64.2	1.1	0.5606	0.0083	0.762393	1.783	0.026	0.8286	0.0093	0.137596	2869.11	42.4788	4241.72	72.6775	4971.71	55.8012	46.3393	56.4899	2.096	4.01768
SH3B-43	95.3	2.9	0.83	0.013	0.566829	1.207	0.019	0.836	0.021	-0.0596935	3895.67	61.0165	4637.73	141.127	4984.34	125.205	5.48495	152.846	1.468	4.37445
SH3B-44	93.2	2.7	0.802	0.021	0.89235	1.275	0.028	0.841	0.011	-0.323605	3796.27	99.4037	4615.34	133.706	4992.81	65.3043	-51.4777	91.4795	1.613	5.44662
SH3B-45	66.8	1.2	0.6271	0.0083	0.621176	1.598	0.021	0.773	0.011	0.140343	3138.11	41.5345	4281.43	76.9118	4872.78	69.341	448.549	63.5197	1.887	4.58295
SH3B-46	103.1	1.9	0.901	0.014	0.657389	1.118	0.018	0.839	0.012	0.269604	4141.05	64.3448	4716.81	86.9248	4989.43	71.3625	-30.6829	108.183	1.331	3.74953
SH3B-47	79.2	2.3	0.726	0.011	0.624765	1.381	0.021	0.787	0.018	-0.127946	3518.5	53.3105	4451.97	129.287	4898.39	112.034	437.933	107.567	1.669	5.04286
SH3B-48	90.2	1.7	0.775	0.01	0.657006	1.29	0.017	0.844	0.012	0.0549973	3698.96	47.7285	4582.48	86.366	4997.86	71.0597	-81.4628	94.2036	1.547	4.4964
SH3B-49	64.7	1.1	0.5661	0.0066	0.62788	1.762	0.021	0.829	0.011	0.0918755	2891.79	33.7145	4249.48	72.2477	4972.39	65.9787	44.4421	63.1048	2.359	4.34216
SH3B-50	74	1.2	0.6456	0.0079	0.697986	1.551	0.019	0.8327	0.0097	0.0798756	3210.99	39.2919	4383.9	71.0903	4978.72	57.9964	25.7841	67.0208	2.006	4.9334
SH3B-51	101.7	3.8	0.872	0.029	0.87787	1.137	0.038	0.838	0.015	0.0344811	4041.95	134.423	4703.06	175.729	4987.73	89.2792	-17.6186	122.577	1.646	4.07498
SH3B-52	82.7	1.4	0.7334	0.0097	0.564946	1.361	0.017	0.831	0.012	0.216128	3546.07	46.9006	4495.34	76.1001	4975.82	71.853	49.3083	86.5282	1.631	3.59066
SH3B-53	57.4	1.1	0.5093	0.0094	0.804669	1.96	0.035	0.8237	0.0097	0.214717	2653.64	48.9775	4129.88	79.1441	4963.28	58.4482	67.5649	52.2307	2.69	5.33333
SH3B-54	103.5	2.1	0.906	0.011	0.561455	1.103	0.013	0.833	0.014	0.0244804	4157.98	50.4832	4720.71	95.7824	4979.23	83.6846	50.7421	119.194	1.48	4.73261
SH3B-55	115.9	2.1	1.002	0.012	0.61446	0.995	0.012	0.838	0.012	0.0642936	4474.76	53.5899	4834.56	87.5978	4987.73	71.4234	-13.3989	119.801	1.34	6.1237
SH3B-56	72.9	2	0.679	0.014	0.762769	1.478	0.03	0.789	0.014	-0.0358521	3340.52	68.8767	4368.9	119.86	4902.01	86.9811	380.876	83.3047	1.589	4.78927
SH3B-57	96.4	1.6	0.8431	0.0095	0.519781	1.184	0.014	0.832	0.012	0.212153	3941.65	44.4143	4649.26	77.1662	4977.53	71.7913	53.8977	99.3863	1.524	3.89105
SH3B-58	88.5	2.1	0.787	0.012	0.635844	1.268	0.019	0.819	0.015	-0.00562905	3742.39	57.0631	4563.37	108.283	4955.14	90.7535	181.591	106.089	1.454	4.43066
SH3B-59	108.6	1.9	0.953	0.014	0.611583	1.056	0.016	0.833	0.012	0.300101	4315.01	63.3895	4769.09	83.4371	4979.23	71.7297	58.4556	112.236	1.395	5.2687
SH3B-60	69.5	1.7	0.609	0.011	0.810337	1.648	0.029	0.831	0.012	-0.157666	3066	55.3793	4321.08	105.695	4975.82	71.853	35.4264	72.062	2.134	3.37838
SH3B-61	103	2.1	0.897	0.012	0.575998	1.113	0.014	0.836	0.014	0.0545442	4127.47	55.217	4715.84	96.1481	4984.34	83.4698	9.56449	119.038	1.367	3.59324
SH3B-62	90.3	2.2	0.772	0.011	0.742455	1.294	0.018	0.835	0.014	-0.255019	3688.05	52.5499	4583.59	111.671	4982.64	83.5413	13.3393	102.399	1.593	6.4433
SH3B-63	77.7	1.2	0.6797	0.0073	0.447095	1.469	0.016	0.837	0.012	0.27428	3343.21	35.9062	4432.8	68.4602	4986.04	71.4844	-8.11422	81.2724	1.773	2.44559
SH3B-64	106.1	2.6	0.922	0.015	0.685153	1.087	0.017	0.84	0.015	-0.0663083	4211.87	68.5228	4745.66	116.293	4991.12	89.1271	-44.9129	130.312	1.48	6.13497
SH3B-65	56.5	1.5	0.4875	0.0075	0.706311	2.045	0.031	0.838	0.016	-0.190881	2559.85	39.3823	4114.11	109.224	4987.73	95.2312	-12.0001	72.0416	3.575	11.1857
SH3B-66	86.3	2.5	0.748	0.016	0.78657	1.351	0.03	0.836	0.015	-0.0303112	3600.14	77.0084	4538.1	131.463	4984.34	89.4319	2.14807	104.749	1.858	4.94071
SH3B-67	72.7	1.4	0.656	0.011	0.72047	1.529	0.027	0.805	0.011	0.264625	3251.6	54.5238	4366.15	84.0799	4930.61	67.3748	242.663	69.8093	1.639	4.51264
SH3B-68	64.1	1.3	0.6064	0.0091	0.568786	1.643	0.024	0.763	0.013	0.185549	3055.57	45.8537	4240.16	85.9939	4854.19	82.7057	491.925	68.4595	1.992	4.77327
SH3B-69	94.9	2.1	0.825	0.012	0.660887	1.214	0.019	0.843	0.014	0.0597823	3878.03	56.4078	4633.5	102.533	4996.18	82.9733	-76.6442	111.569	1.567	3.41413
SH3B-70	92.7	1.6	0.808	0.011	0.661643	1.239	0.016	0.838	0.011	0.121408	3817.7	51.9737	4609.94	79.5674	4987.73	65.4714	-18.0047	91.4465	1.585	4.79386
SH3B-71	40.7	1.3	0.4946	0.0093	0.806206	2.035	0.037	0.596	0.012	-0.388257	2590.55	48.7102	3787.89	120.989	4498.28	90.5693	1119.28	48.7536	1.679	4.4603
SH3B-72	99.5	2.3	0.86	0.017	0.752659	1.169	0.023	0.844	0.013	0.148525	4000.49	79.0795	4681.08	108.206	4997.86	76.9813	-93.4125	110.649	1.485	5.30223
SH3B-73	84.9	1.6	0.745	0.01	0.641962	1.339	0.018	0.827	0.012	0.0925317	3589.07	48.1754	4521.69	85.2144	4968.96	72.101	89.4211	87.1007	1.845	5.88582
SH3B-74	70.1	1.3	0.606	0.01	0.724625	1.654	0.028	0.837	0.011	0.259308	3053.97	50.3955	4329.68	80.2937	4986.04	65.5274	-7.87905	68.4667	2.204	5.26316
SH3B-75	84.4	2.5	0.728	0.011	0.53032	1.378	0.021	0.836	0.021	-0.0184923	3525.96	53.2769	4515.76	133.761	4984.34	125.205	1.55624	134.213	1.842	4.46828
SH3B-76	92.7	2.4	0.8108	0.0097	0.529509	1.234	0.015	0.817	0.018	-0.069323	3827.68	45.7924	4609.94	119.351	4951.66	109.094	212.681	125.69	1.616	4.42478
SH3B-78	94.2	2.4	0.815	0.016	0.708454	1.228	0.024	0.831	0.015	0.0831616	3842.61	75.4378	4626.06	117.862	4975.82	89.8162	61.073	112.695	1.529	4.43853
SH3B-79	37	1	0.4101	0.0052	0.623483	2.44	0.031	0.65	0.014	-0.192111	2215.38	28.0906	3693.54	99.8255	4623.95	99.5928	716.987	46.1222	2.908	4.37637
SH3B-80	105.5	1.8	0.906	0.011	0.567012	1.102	0.014	0.841	0.012	0.20382	4157.98	50.4832	4739.96	80.8713	4992.81	71.241	-58.2286	109.435	1.408	3.16656
SH3B-81	99	2.7	0.857	0.02	0.823561	1.173	0.027	0.839	0.013	0.0365984	3990.09	93.1176	4676.01	127.528	4989.43	77.3094	-30.2253	108.749	1.533	4.25532
SH3B-82	70.6	1.3	0.6317	0.009	0.742594	1.583	0.022	0.81	0.01	0.0189427	3156.31	44.9688	4336.8	79.856	4939.42	60.9805	193.372	63.9986	1.737	3.92619
SH3B-83	103.8	1.5	0.902	0.012	0.756113	1.111	0.014	0.8409	0.0082	0.183329	4144.44	55.1366	4723.62	68.2604	4992.64	48.6855	-56.626	87.3129	1.841	4.57457
SH3B-84	108.2	1.2	0.945	0.011	0.676672	1.058	0.012	0.8303	0.0076	0.430689	4288.55	49.9197	4765.38	52.8508	4974.62	45.5343	95.934	85.1517	1.416	3.8956
SH3B-85	66.3	2.5	0.6395	0.0098	0.412767	1.574	0.024	0.757	0.026	-0.00925893	3187.05	48.8399	4273.91	161.158	4842.91	166.335	569.888	127.745	1.714	4.30293
SH3B-87	53.5	2.2	0.5388	0.0097	0.665992	1.863	0.034	0.717	0.023	-0.280909	2778.42	50.0199	4059.71	166.941	4765.17	152.858	662.928	94.7027	1.796	4.47227
SH3B-88	103.3	2.2	0.893	0.01	0.542095	1.119	0.013	0.838	0.015	0.00432244	4113.86	46.0679	4718.76	100.496	4987.73	89.2792	-17.2833	125.507	1.423	4.22654
KR1 (Kingston Range olistolith)
KR_0	57.1	3.4	0.616	0.014	0.535009	1.63	0.036	0.665	0.034	-0.196477	3093.98	70.3178	4124.65	245.601	4656.88	238.096	1089.04	146.576	2.83	4.60405
KR_1	129.4	5.7	1.177	0.035	0.862886	0.863	0.025	0.8	0.019	-0.390335	5014.97	149.128	4945.53	217.848	4921.74	116.891	783.351	173.87	2.794	6.58762
KR_2	35.3	1.3	0.451	0.01	0.701435	2.252	0.05	0.566	0.015	-0.136767	2399.7	53.2084	3647.07	134.311	4423.05	117.219	1115	54.0656	2.948	6.32911
KR_3	42.5	1	0.5071	0.0079	0.73044	1.983	0.032	0.6068	0.0098	-0.0621461	2644.24	41.194	3830.8	90.1364	4524.37	73.0698	1107.31	42.4408	3.304	5.23834
KR_4	34.5	1.7	0.443	0.014	0.867425	2.292	0.073	0.557	0.015	-0.40131	2364.06	74.7106	3624.44	178.596	4399.64	118.482	1124.25	58.5576	2.147	5.93472
KR_5	10.24	0.36	0.2484	0.0043	0.569307	4.016	0.067	0.2997	0.0087	-0.118673	1430.22	24.7582	2456.7	86.3683	3468.67	100.692	1078.17	23.582	2.146	3.24465
KR_6	35.7	1.3	0.4477	0.0076	0.452416	2.237	0.038	0.585	0.019	0.0157693	2385.02	40.4873	3658.2	133.212	4471.18	145.218	1037.41	62.9181	2.663	5.90319
KR_7	45.4	2.6	0.487	0.019	0.857969	2.103	0.083	0.675	0.021	-0.307086	2557.68	99.7864	3896.33	223.138	4678.39	145.55	770.588	81.72	4.39	5.19751
KR_8	33	1.3	0.4226	0.0076	0.596945	2.384	0.041	0.561	0.018	-0.205351	2272.27	40.8643	3580.61	141.054	4410.1	141.5	1052.85	57.0746	3.41	5.92768
KR_9	52.1	2.1	0.585	0.015	0.804508	1.731	0.044	0.643	0.016	-0.284079	2969.12	76.1312	4033.28	162.57	4608.31	114.67	1133.76	73.2106	3.127	6.17284
KR_10	40.8	1.2	0.4771	0.007	0.571339	2.095	0.031	0.619	0.015	-0.0820977	2514.62	36.8945	3790.32	111.48	4553.24	110.337	982.334	54.8414	3.038	6.03865
KR_11	52.7	6.2	0.576	0.049	0.999	1.944	0.047	0.636	0.017	-0.999	2932.41	249.458	4044.69	475.846	4592.48	122.755	1147.1	117.199	2.721	5.64016
KR_12	76.9	2.1	0.77	0.013	0.524866	1.299	0.019	0.727	0.017	0.0219307	3680.77	62.1429	4422.43	120.768	4785.03	111.892	993.958	98.9841	2.063	6.0423
KR_13	57.8	3.2	0.607	0.02	0.845675	1.703	0.047	0.674	0.022	-0.687137	3057.98	100.757	4136.81	229.028	4676.26	152.638	1019.23	100.826	2.308	5.84112
KR_14	40.1	2.1	0.483	0.016	0.758316	2.1	0.071	0.604	0.021	-0.166146	2540.32	84.1514	3773.17	197.598	4517.65	157.071	1056.92	79.2376	1.438	3.38066
KR_15	50.3	1.7	0.557	0.011	0.748908	1.802	0.031	0.65	0.015	-0.39517	2854.22	56.367	3998.26	135.13	4623.95	106.707	1033.01	64.9894	3.015	6.54879
KR_16	49.2	3	0.555	0.022	0.88635	1.826	0.073	0.631	0.02	-0.440032	2845.93	112.812	3976.26	242.455	4581.06	145.2	1119.75	89.2456	2.83	7.54717
KR_17	12.07	0.42	0.2722	0.0044	0.463085	3.692	0.061	0.321	0.0099	0.0130757	1551.96	25.0868	2609.86	90.8153	3574.63	110.246	1141.11	25.8602	1.925	3.3761
KR_18	69.7	3.2	0.714	0.018	0.68872	1.401	0.036	0.708	0.024	-0.171316	3473.52	87.5677	4323.95	198.517	4747.04	160.917	1028.52	124.601	2.6	6.43087
KR_19	55.9	2.2	0.6	0.011	0.696082	1.662	0.03	0.674	0.02	-0.319767	3029.84	55.547	4103.46	161.496	4676.26	138.761	1004.22	88.5254	3.321	5.35619
KR_20	41.2	1.8	0.477	0.01	0.607683	2.124	0.042	0.626	0.022	-0.203372	2514.19	52.7083	3799.99	166.019	4569.54	160.591	954.001	77.74	2.802	6.42261
KR_21	24.5	1.1	0.3608	0.0077	0.779973	2.774	0.059	0.48	0.015	-0.441506	1985.96	42.3834	3288.5	147.647	4180.93	130.654	1109.36	44.4519	4.07	6.19195
KR_22	38.5	1.8	0.4672	0.0099	0.705328	2.135	0.044	0.597	0.021	-0.361271	2471.27	52.3664	3732.85	174.523	4500.71	158.317	1043.69	72.6193	2.79	5.66251
KR_23	14.02	0.62	0.2846	0.0064	0.836304	3.535	0.078	0.354	0.01	-0.538084	1614.49	36.3061	2751.06	121.659	3724.3	105.206	1127.18	31.6016	1.752	3.22893
KR_24	28.4	1.4	0.3835	0.0091	0.608335	2.635	0.062	0.53	0.021	-0.164372	2092.61	49.6552	3433	169.233	4326.89	171.443	1038.3	61.3422	2.72	4.54545
KR_25	52.1	2.2	0.56	0.011	0.540838	1.8	0.037	0.673	0.024	-0.0605856	2866.63	56.3088	4033.28	170.311	4674.12	166.685	925.364	98.4172	3.271	5.74713
KR_26	23.3	1.1	0.3457	0.007	0.753207	2.894	0.057	0.491	0.017	-0.470803	1914.03	38.7568	3239.56	152.94	4214.41	145.917	1031.08	46.2293	4.23	5.34474
KR_27	22	0.63	0.3555	0.0066	0.533424	2.84	0.049	0.45	0.011	0.0891204	1960.81	36.4032	3183.73	91.1704	4085.21	99.8606	1171.38	34.9292	2.07	3.50754
KR_28	42.8	1.8	0.4874	0.0078	0.538757	2.048	0.032	0.638	0.023	-0.199685	2559.42	40.9591	3837.78	161.402	4597.02	165.723	928.838	81.8997	3.09	4.47628
KR_29	42.9	1.8	0.4858	0.0086	0.580339	2.062	0.037	0.632	0.022	-0.181513	2552.48	45.1859	3840.09	161.123	4583.35	159.547	950.079	78.4966	2.612	5.59284
KR_30	64	1.8	0.673	0.013	0.646378	1.486	0.03	0.698	0.015	0.0903261	3317.44	64.0814	4238.6	119.211	4726.61	101.575	1013.53	78.3436	2.273	5.93824
KR_31	63	14	0.619	0.096	0.999	2.054	0.065	0.628	0.02	-0.999	3105.94	481.696	4222.86	938.413	4574.16	145.674	1297.69	211.816	2.965	5.72082
KR_32	52.6	2.4	0.563	0.013	0.675042	1.777	0.04	0.666	0.023	-0.246042	2879.01	66.4781	4042.8	184.462	4659.05	160.898	966.994	95.3733	2.778	7.36377
KR_33	47.7	1.6	0.5314	0.0073	0.676515	1.877	0.025	0.647	0.017	-0.367684	2747.35	37.7411	3945.45	132.342	4617.27	121.319	988.977	67.5455	2.682	5.70451
KR_34	22.81	0.81	0.3507	0.0068	0.436322	2.873	0.053	0.466	0.015	0.0971892	1937.94	37.5763	3218.87	114.305	4137.1	133.168	1113	42.4112	4.08	5.93824
KR_35	35.3	1.3	0.4374	0.0067	0.374089	2.296	0.034	0.585	0.02	0.0314724	2338.99	35.8282	3647.07	134.311	4471.18	152.861	1010.24	64.0814	2.773	6.01323
KR_36	42.4	2	0.498	0.012	0.764397	2.031	0.049	0.612	0.02	-0.364622	2605.2	62.7758	3828.46	180.588	4536.75	148.26	1062.39	74.86	3	5.43183
KR_37	43.2	1.4	0.519	0.0088	0.742633	1.937	0.033	0.613	0.014	-0.306349	2694.94	45.6945	3847.01	124.672	4539.12	103.667	1111.32	56.27	4.17	6.86342
KR_38	39.9	1.8	0.476	0.011	0.695738	2.117	0.044	0.598	0.02	-0.348592	2509.82	58	3768.22	169.995	4503.15	150.607	1062.6	71.4487	2.706	6.57895
KR_39	52.2	3	0.574	0.02	0.929721	1.79	0.058	0.639	0.018	-0.799543	2924.22	101.889	4035.19	231.908	4599.28	129.557	1127.29	82.8077	3.142	6.80272
KR_40	44.5	2.4	0.506	0.01	0.69693	1.997	0.04	0.634	0.027	-0.406728	2639.53	52.1646	3876.44	209.066	4587.92	195.385	988.625	98.2651	2.313	6.22278
KR_41	186	14	1.61	0.11	0.889356	0.713	0.054	0.842	0.029	0.240912	6184.37	422.535	5311.58	399.796	4994.49	172.019	-24.0711	395.699	1.125	10.1112
KR_42	52.9	2.5	0.563	0.012	0.593275	1.772	0.036	0.673	0.026	-0.209056	2879.01	61.3644	4048.46	191.326	4674.12	180.575	931.579	106.569	2.82	6.3857
KR_43	48.2	2.5	0.534	0.014	0.739084	1.88	0.048	0.649	0.024	-0.355239	2758.28	72.3145	3955.82	205.178	4621.73	170.911	985.573	94.5875	3.35	6.01685
KR_44	91.7	4.5	0.87	0.02	0.618171	1.163	0.027	0.764	0.03	-0.179512	4035.06	92.76	4599.04	225.689	4856.06	190.683	828.614	190.884	2.364	5.80046
KR_45	24.7	1.1	0.3639	0.0078	0.656677	2.772	0.057	0.493	0.017	-0.261914	2000.63	42.8825	3296.43	146.805	4220.41	145.532	1083.88	48.9035	3.62	6.92042
KR_46	55.6	2.2	0.608	0.012	0.67269	1.662	0.033	0.665	0.02	-0.223468	3061.99	60.434	4098.1	162.155	4656.88	140.057	1071.01	89.2433	2.378	6.41849
KR_47	43.3	2	0.492	0.0085	0.561709	2.028	0.036	0.638	0.025	-0.20334	2579.32	44.5615	3849.3	177.797	4597.02	180.134	939.279	89.2587	2.625	6.03136
KR_48	46.8	2.3	0.525	0.011	0.754896	1.916	0.041	0.638	0.023	-0.426313	2720.35	56.9978	3926.51	192.97	4597.02	165.723	1015.35	88.133	2.595	7.47943
KR_49	58	2.8	0.598	0.013	0.605997	1.667	0.038	0.69	0.027	-0.156803	3021.78	65.6908	4140.26	199.875	4710.03	184.306	911.855	117.49	2.6	6.77966
KR_50	41.3	2.1	0.47	0.011	0.650593	2.15	0.048	0.628	0.025	-0.282576	2483.56	58.1259	3802.39	193.342	4574.16	182.092	929.63	86.5724	3.95	7.82473
KR_51	48	2.3	0.52	0.01	0.543896	1.94	0.04	0.662	0.027	-0.12333	2699.18	51.9073	3951.69	189.352	4650.36	189.667	894.969	102.164	2.299	5.49753
KR_52	45.7	1.9	0.5118	0.0094	0.597963	1.965	0.037	0.648	0.022	-0.173108	2664.31	48.9342	3902.87	162.264	4619.5	156.835	940.494	82.8919	2.76	6.30915
KR_53	22.1	1.1	0.342	0.0082	0.648312	2.936	0.071	0.464	0.018	-0.206651	1896.28	45.4665	3188.13	158.685	4130.72	160.243	1088.81	49.7345	3.37	5.9988
KR_54	44.3	2.3	0.506	0.012	0.588842	1.991	0.046	0.635	0.027	-0.180094	2639.53	62.5976	3871.97	201.028	4590.2	195.174	984.301	99.1046	3.7	5.37634
KR_55	33.7	1.7	0.4157	0.0081	0.539229	2.425	0.049	0.579	0.025	-0.155931	2240.93	43.665	3601.3	181.668	4456.16	192.408	973.765	75.6819	3.12	5.84454
KR_56	48.5	2.5	0.5244	0.0098	0.497671	1.915	0.037	0.663	0.03	-0.135122	2717.81	50.7906	3962	204.227	4652.54	210.522	899.596	113.469	2.539	5.34188
KR_57	56.3	3.7	0.59	0.022	0.833581	1.773	0.052	0.67	0.027	-0.776239	2989.42	111.47	4110.58	270.144	4667.68	188.101	1004.34	118.203	3.22	4.78011
KR_58	41.7	2.2	0.4815	0.0097	0.550078	2.088	0.042	0.623	0.028	-0.198457	2533.8	51.0443	3811.95	201.11	4562.58	205.06	976.795	96.9704	3.24	5.54017
KR_59	54.6	3.1	0.578	0.015	0.615107	1.741	0.042	0.679	0.031	-0.252949	2940.58	76.3128	4080	231.648	4686.9	213.982	931.387	129.366	2.298	5.80383
KR_60	35.3	1.7	0.434	0.0085	0.474524	2.318	0.047	0.588	0.025	-0.0582537	2323.72	45.5107	3647.07	175.638	4478.62	190.418	990.752	78.7885	2.98	5.85823
KR_61	37.5	2.2	0.459	0.013	0.733109	2.204	0.061	0.588	0.025	-0.368844	2435.14	68.9691	3706.82	217.467	4478.62	190.418	1056.27	85.1815	2.201	7.4129
KR_62	49.3	3.7	0.546	0.023	0.722305	1.863	0.078	0.638	0.034	-0.232989	2808.52	118.307	3978.28	298.572	4597.02	244.982	1064.86	135.512	1.931	4.90196
KR_63	39.7	2.1	0.4547	0.0087	0.489268	2.201	0.042	0.622	0.029	-0.146205	2416.11	46.2287	3763.24	199.063	4560.25	212.616	917.257	95.2375	2.385	5.28262
KR_64	35	2	0.425	0.01	0.484252	2.382	0.054	0.598	0.03	-0.103151	2283.14	53.7209	3638.64	207.923	4503.15	225.91	932.767	92.5871	2.63	6.09385
KR_65	165	97	1.08	0.53	0.999	2.507	0.095	0.578	0.029	-0.999	4721.15	2316.86	5190.63	3051.46	4453.65	223.453	3706.65	6819.8	3.44	5.61482
KR_66	37.3	1.9	0.4402	0.0083	0.50584	2.281	0.043	0.607	0.027	-0.155496	2351.54	44.3384	3701.53	188.55	4524.84	201.27	938.356	86.0647	2.8	5.64334
KR_67	43.9	2.2	0.516	0.016	0.766985	1.931	0.057	0.606	0.02	-0.282718	2682.19	83.1688	3862.96	193.588	4522.45	149.256	1133.76	79.9406	2.918	7.0922
KR_68	25	1.4	0.3559	0.0084	0.535841	2.814	0.065	0.503	0.024	-0.147826	1962.71	46.3242	3308.22	185.26	4250.02	202.784	1031.2	63.9917	2.99	5.4615
KR_69	88.5	5.1	0.813	0.023	0.640052	1.244	0.034	0.776	0.035	-0.218866	3835.51	108.508	4563.37	262.974	4878.31	220.027	630.175	213.134	2.53	5.9312
KR_70	11.33	0.63	0.2557	0.006	0.425722	3.927	0.094	0.318	0.016	0.00525076	1467.8	34.442	2550.68	141.829	3560.19	179.129	1076.85	37.2437	1.841	3.21543
KR_71	43	2.6	0.492	0.014	0.783396	2.041	0.056	0.618	0.026	-0.490859	2579.32	73.3954	3842.4	232.331	4550.9	191.462	1022.66	94.1542	2.62	6.02047
KR_72	22.1	1.2	0.3273	0.0077	0.624577	3.044	0.071	0.481	0.021	-0.244614	1825.28	42.9412	3188.13	173.111	4184.01	182.67	997.48	53.3442	3.17	6.10501
KR_73	30.8	2	0.404	0.011	0.650136	2.514	0.067	0.543	0.028	-0.30828	2187.43	59.5588	3512.68	228.096	4362.41	224.949	1058.52	83.1301	1.892	6.26959
KR_74	39.9	2.5	0.458	0.013	0.730028	2.195	0.054	0.606	0.028	-0.521582	2430.72	68.9943	3768.22	236.104	4522.45	208.958	986.062	94.1586	2.82	5.96303
KR_75	78.6	4.4	0.731	0.015	0.442187	1.371	0.027	0.774	0.039	-0.104287	3537.14	72.5816	4444.35	248.793	4874.63	245.621	551.553	214.988	2.3	6.68449
KR_76	32.7	1.9	0.4	0.01	0.63009	2.513	0.065	0.601	0.028	-0.22261	2169.04	54.226	3571.61	207.525	4510.42	210.136	860.963	82.9481	2.69	4.46828
KR_77	28.9	1.5	0.39	0.0087	0.56805	2.567	0.058	0.531	0.023	-0.156987	2122.83	47.3554	3450.13	179.072	4329.66	187.537	1054.58	66.5528	3.3	5.91716
KR_78	39.1	1.6	0.468	0.01	0.709084	2.147	0.045	0.603	0.018	-0.275022	2474.78	52.88	3748.16	153.377	4515.24	134.783	1022.67	64.1493	3.24	5.50964
KR_79	43.2	2	0.4948	0.0092	0.726077	2.031	0.037	0.625	0.022	-0.446328	2591.41	48.183	3847.01	178.102	4567.22	160.766	1000.38	79.6025	2.696	5.50055
KR_80	52.7	2.1	0.579	0.014	0.741417	1.744	0.04	0.66	0.018	-0.25421	2944.67	71.201	4044.69	161.174	4645.99	126.709	1032.61	79.3765	2.962	6.16523
KR_81	33.6	2	0.425	0.014	0.906072	2.433	0.066	0.549	0.018	-0.973808	2283.14	75.2093	3598.37	214.189	4378.49	143.557	1099.83	64.2195	2.56	6.74309
KR_82	49.6	1.7	0.55	0.011	0.710708	1.809	0.035	0.653	0.016	-0.210968	2825.17	56.5035	3984.31	136.559	4630.6	113.46	1002.58	67.811	2.883	7.15308
KR_83	29.5	1.9	0.39	0.014	0.86782	2.637	0.085	0.53	0.02	-0.692735	2122.83	76.2041	3470.3	223.511	4326.89	163.279	1057.61	65.867	2.653	7.24638
KR_84	51.5	2.2	0.571	0.012	0.643499	1.76	0.037	0.66	0.022	-0.193933	2911.92	61.1963	4021.74	171.803	4645.99	154.866	1014.79	92.0384	3.007	7.35835
KR_85	51.1	1.9	0.565	0.018	0.813717	1.841	0.073	0.646	0.014	0.383712	2887.26	91.9834	4013.98	149.248	4615.04	100.016	1071.16	67.4391	3.07	6.88231
Standard: Durango apatite
Durango_0	0.1701	0.0084	0.00629	0.00016	0.226884	157.4	4	0.1914	0.0096	0.283558	40.421	1.0282	159.506	7.87683	2754.23	138.143	33.0442	0.971692	14.61	17.9211
Durango_1	0.2054	0.0092	0.00634	0.00015	0.140789	156.3	3.6	0.231	0.011	0.360995	40.7413	0.96391	189.685	8.49612	3058.99	145.666	31.2688	0.930544	12.04	19.7902
Durango_2	0.2001	0.0091	0.00661	0.00017	0.250631	152.7	3.8	0.216	0.01	0.301383	42.4706	1.09228	185.211	8.42288	2951.11	136.625	33.4028	1.01149	13.03	18.1818
Durango_3	0.203	0.011	0.00646	0.00019	0.284114	155.6	4.7	0.223	0.012	0.268185	41.5099	1.22088	187.662	10.1689	3002.48	161.568	32.2791	1.13757	12.04	19.8413
Durango_4	0.434	0.035	0.00891	0.00041	0.679284	118.1	4.8	0.351	0.021	-0.261597	57.1832	2.63132	366.013	29.5172	3711.34	222.046	35.2438	2.21921	11.95	19.5312
Durango_5	0.656	0.043	0.01047	0.00037	0.416468	97.5	3.2	0.449	0.027	0.100475	67.1431	2.37277	512.164	33.5717	4081.9	245.459	33.078	2.57379	10.14	18.1488
Durango_6	0.22	0.012	0.00659	0.0002	0.326439	153.4	4.3	0.245	0.013	0.210451	42.3425	1.28505	201.91	11.0133	3152.74	167.288	31.7509	1.18697	12.37	18.9036
Durango_7	0.2026	0.0081	0.00645	0.00016	0.154707	154.9	3.9	0.229	0.01	0.428572	41.4459	1.02811	187.324	7.48926	3045.07	132.973	31.9151	0.948	12.86	18.3486
Durango_8	0.206	0.009	0.00647	0.00018	0.0309486	155.2	4.4	0.235	0.012	0.518935	41.574	1.15662	190.19	8.30929	3086.42	157.604	31.6988	1.08268	12.1	18.6916
Durango_9	0.1812	0.0093	0.00631	0.00016	0.234415	159.2	4.1	0.213	0.011	0.26168	40.5491	1.02819	169.093	8.67859	2928.51	151.238	32.043	0.987554	13.12	17.762
Durango_10	0.203	0.011	0.00625	0.00014	0.001	160.6	3.7	0.238	0.014	0.38914	40.1647	0.899689	187.662	10.1689	3106.64	182.744	30.4705	0.984298	12.76	18.2482
Durango_11	0.188	0.01	0.00645	0.00016	0.001	154	3.6	0.213	0.013	0.505397	41.4459	1.02811	174.921	9.30432	2928.51	178.735	32.7527	1.05871	12.91	18.2815
Durango_12	0.222	0.014	0.00647	0.00021	0.444044	154.1	4.8	0.247	0.014	0.0583193	41.574	1.34939	203.573	12.8379	3165.64	179.429	31.0687	1.24664	13.04	18.797
Durango_13	0.511	0.027	0.00918	0.00029	0.63014	111	3.6	0.414	0.017	-0.020196	58.9081	1.86093	419.121	22.1454	3960.72	162.638	31.6169	1.61203	13.02	20
Durango_14	0.217	0.014	0.00648	0.00018	0.277585	155.6	4.5	0.239	0.015	0.168879	41.638	1.15661	199.41	12.8652	3113.32	195.397	31.5374	1.17783	12.66	18.7617
Durango_15	0.235	0.018	0.00666	0.00021	0.435765	151.8	4.9	0.261	0.018	-0.0154327	42.7908	1.34926	214.318	16.4158	3252.75	224.328	31.2227	1.38305	14.01	17.6678
Durango_16	0.206	0.014	0.00639	0.00016	0.280645	157	3.9	0.229	0.015	0.08877	41.0615	1.02814	190.19	12.9256	3045.07	199.459	31.6187	1.10902	12.77	18.8679
Durango_17	0.194	0.012	0.00626	0.00018	0.190028	160.5	4.7	0.222	0.014	0.273013	40.2288	1.15674	180.037	11.1363	2995.25	188.89	31.3322	1.14673	14.03	17.4216
Durango_18	0.175	0.012	0.0062	0.00017	0.315472	161.1	4.5	0.199	0.013	0.094746	39.8444	1.09251	163.749	11.2285	2818.01	184.091	32.1898	1.09739	14.62	17.6367
Durango_19	0.209	0.015	0.00638	0.00021	0.128982	161.4	5.3	0.24	0.018	0.315153	40.9975	1.34945	192.713	13.8311	3119.97	233.998	30.9997	1.38081	12.92	18.797
Durango_20	0.21	0.014	0.00668	0.0002	0.290721	152.2	4.5	0.232	0.015	0.159555	42.9189	1.285	193.553	12.9035	3065.9	198.226	32.8885	1.27572	12.31	18.3486
Durango_21	0.646	0.05	0.01011	0.00041	0.577603	101.9	4	0.458	0.029	-0.0886144	64.846	2.62976	506.014	39.1652	4111.4	260.329	31.2041	2.6943	12.61	18.7266
Durango_22	0.457	0.034	0.0085	0.00032	0.536465	120.5	4.6	0.382	0.024	-0.0272192	54.563	2.05413	382.169	28.4327	3839.7	241.238	31.4865	2.03519	10.76	20
Durango_23	0.223	0.015	0.0066	0.00021	0.410631	155	5	0.244	0.015	0.0744514	42.4065	1.3493	204.404	13.7491	3146.25	193.417	31.8526	1.29202	11.88	18.5529
Durango_24	0.191	0.014	0.00633	0.00019	0.349791	158.2	4.7	0.218	0.015	0.0597855	40.6772	1.22096	177.482	13.0092	2965.98	204.081	31.8875	1.22755	13.16	17.6991
Durango_25	0.212	0.012	0.00644	0.00018	0.25855	156.3	4.8	0.231	0.013	0.262178	41.3818	1.15663	195.23	11.0507	3058.99	172.151	31.7612	1.11675	12.56	18.5185
Durango_26	0.18	0.011	0.0063	0.00015	0.185985	158.4	4	0.212	0.013	0.214193	40.485	0.963929	168.061	10.2704	2920.9	179.112	32.0434	1.01091	13.6	17.6991
Durango_27	0.417	0.048	0.00831	0.00045	0.831723	126	6.5	0.341	0.026	-0.607	53.3483	2.8889	353.904	40.7371	3667.26	279.615	33.549	2.52245	12.33	17.6991
Standard: McClure Mountain syenite apatite
A_MM_0	4.27	0.11	0.114	0.0014	0.410625	8.79	0.11	0.276	0.0065	0.0807665	695.936	8.54659	1687.6	43.4744	3340.45	78.6699	518.823	8.25956	10.71	2.72331
A_MM_1	2.488	0.099	0.1007	0.0014	0.622366	9.95	0.14	0.1819	0.006	-0.320319	618.51	8.59895	1268.55	50.4767	2670.27	88.0793	529.204	8.43539	15.84	2.95858
A_MM_2	3.793	0.098	0.1097	0.0014	0.461671	9.16	0.12	0.2529	0.0058	0.0499828	671.005	8.56342	1591.26	41.1136	3203.01	73.4578	518.297	7.9672	8.2	2.30203
A_MM_3	3.6	0.094	0.1105	0.0015	0.56848	9.08	0.12	0.237	0.0051	-0.0774712	675.651	9.17173	1549.53	40.46	3099.93	66.7075	534.86	8.19903	11.77	2.43902
A_MM_4	3.009	0.082	0.1017	0.0014	0.583596	9.89	0.14	0.2159	0.0048	-0.0762266	624.364	8.59498	1409.9	38.4221	2950.36	65.594	508.983	7.72428	12.25	2.52845
A_MM_5	2.955	0.099	0.1072	0.0016	0.63367	9.29	0.13	0.1987	0.0053	-0.288183	656.466	9.798	1396.13	46.774	2815.55	75.1002	549.331	9.01178	14.62	2.48633
A_MM_6	2.437	0.077	0.0981	0.0013	0.562036	10.19	0.13	0.181	0.0048	-0.195508	603.265	7.99433	1253.59	39.6087	2662.05	70.5959	516.508	7.52279	16.62	2.36967
A_MM_7	5.96	0.18	0.1257	0.0017	0.598684	7.94	0.11	0.3453	0.0085	-0.167476	763.288	10.3229	1970.03	59.4974	3686.39	90.7451	506.93	10.3124	10.87	2.58398
A_MM_8	2.494	0.08	0.0989	0.0012	0.640503	10.11	0.12	0.1844	0.0048	-0.340603	607.959	7.37665	1270.29	40.7471	2692.85	70.0958	518.155	7.0568	14.88	2.6688
A_MM_9	2.93	0.11	0.1009	0.0014	0.633278	9.9	0.13	0.2085	0.0064	-0.365704	619.681	8.59815	1389.69	52.1728	2893.92	88.8302	510.552	8.38551	22.43	3.73274
A_MM_10	1.595	0.059	0.0905	0.0013	0.513245	11.08	0.16	0.1278	0.0041	-0.140915	558.494	8.02256	968.256	35.8164	2067.93	66.3421	512.747	7.69061	28.68	2.457
A_MM_11	2.54	0.075	0.099	0.0014	0.460427	10.1	0.15	0.1869	0.0049	0.0462714	608.546	8.6057	1283.57	37.9008	2715.07	71.1817	516.851	7.97419	17.46	3.72578
A_MM_12	2.92	0.086	0.1002	0.0012	0.629333	9.98	0.13	0.21	0.005	-0.210954	615.581	7.37223	1387.11	40.8531	2905.55	69.1796	505.989	6.96854	11.77	2.44379
A_MM_13	4.36	0.16	0.1129	0.0016	0.705226	8.86	0.12	0.2804	0.008	-0.451903	689.568	9.77244	1704.79	62.5612	3365.16	96.0103	510.289	9.6854	18.04	2.6976
A_MM_14	5.24	0.28	0.1269	0.0027	0.612226	7.9	0.17	0.297	0.013	-0.252859	770.156	16.3863	1859.15	99.3437	3454.65	151.213	556.544	16.6955	12.55	3.62319
A_MM_15	3.34	0.14	0.105	0.0014	0.676345	9.55	0.13	0.2301	0.0079	-0.420357	643.644	8.58193	1490.45	62.4742	3052.74	104.81	514.17	9.04659	19.26	2.91121
A_MM_16	1.836	0.09	0.0918	0.0016	0.655503	10.92	0.2	0.1431	0.0057	-0.329576	566.174	9.86795	1058.43	51.8838	2265.06	90.2224	509.635	9.48704	21.69	3.22581
A_MM_17	4.49	0.22	0.1142	0.002	0.514976	8.76	0.16	0.281	0.012	-0.156086	697.094	12.2083	1729.12	84.7232	3368.5	143.85	515.524	13.3697	7.39	2.23214
A_MM_18	6.02	0.34	0.1293	0.0031	0.542733	7.83	0.19	0.334	0.016	-0.131697	783.871	18.7935	1978.74	111.756	3635.54	174.158	531.81	19.6074	10.92	4.1841
A_MM_19	4.39	0.22	0.1132	0.0021	0.504206	8.85	0.16	0.274	0.012	-0.168286	691.305	12.8246	1710.46	85.7178	3329.07	145.799	516.928	13.6718	11.48	2.61097
A_MM_21	3.82	0.18	0.1078	0.0018	0.377322	9.29	0.16	0.252	0.011	-0.012182	659.959	11.0197	1596.97	75.2498	3197.37	139.568	510.241	12.0394	13.01	3.32226
A_MM_22	4.91	0.24	0.118	0.0021	0.454108	8.47	0.15	0.297	0.013	-0.103014	719.042	12.7965	1803.98	88.1781	3454.65	151.213	518.426	14.411	7.15	2.63852
A_MM_23	3.68	0.14	0.1079	0.0015	0.541341	9.29	0.13	0.2448	0.008	-0.200656	660.54	9.18267	1567.04	59.6156	3151.44	102.988	516.403	9.44532	16.05	3.51865
A_MM_24	4.22	0.17	0.1122	0.0016	0.421631	8.9	0.12	0.273	0.01	-0.100503	685.512	9.77557	1677.92	67.5938	3323.34	121.734	513.291	10.9014	7.83	2.48139
A_MM_25	1.759	0.071	0.0928	0.0012	0.644075	10.82	0.14	0.1372	0.0046	-0.389239	572.075	7.39753	1030.48	41.5941	2192.16	73.498	519.071	7.26241	19.53	3.01568
A_MM_26	4.81	0.2	0.1179	0.002	0.631313	8.49	0.15	0.298	0.01	-0.245135	718.465	12.1877	1786.65	74.2889	3459.86	116.103	517.132	12.1706	18.22	5.36193
Published Standard Ages:
Durango apatite, 31.44 ± 0.18 Ma (McDowell et al., 2005); McClure Mountain syenite apatite, 523.51 ± 2.09 Ma (Schoene & Bowring, 2006)

## Sheet: Table S2
Table S2: Isotopic age data, including standards, for U-Pb zircon by Laser Ablation Inductively Coupled Mass Spectrometry of metabasites from the Kingston Peak Formation in the Silurian Hills, Death Valley, USA.
Sample	Isotopic Ratios							Age/Ma						Concentrations		Disc.
- Grain - Spot	207Pb/235U	2σ	206Pb/238U	2σ	ρ	207Pb/206Pb	2σ	206Pb/238U	2σ	207Pb/235U	2σ	207Pb/206Pb	2σ	U/ppm	Th/U	%
Trinity College, Dublin: Metabasite Zircons LA-ICPMS
SH5A-1-1	4.77	0.19	0.314	0.012	0.78133	0.1079	0.0031	1760.36	67.2749	1779.63	70.8869	1764.26	50.6876	263	0.3663	0.220793
SH5A-1-2	4.83	0.19	0.316	0.011	0.72902	0.1121	0.0037	1770.16	61.6197	1790.14	70.4195	1833.74	60.5248	399	0.299401	3.46686
SH5A-2-1	11.38	0.82	0.476	0.03	0.93641	0.1719	0.0064	2509.82	158.182	2554.79	184.088	2576.23	95.9154	642	0.373134	2.57777
SH5A-2-2	12.05	0.52	0.491	0.021	0.83784	0.1733	0.0039	2575	110.132	2608.3	112.558	2589.77	58.2811	242.7	0.714286	0.570331
SH5A-2-3	11.5	0.7	0.491	0.034	0.83605	0.1704	0.0058	2575	178.31	2564.58	156.105	2561.58	87.1898	58.1	0.442478	-0.524107
SH5A-3-1	3.29	0.24	0.237	0.016	0.85011	0.0999	0.0035	1371.08	92.5625	1478.69	107.868	1622.22	56.8346	239	0.813008	15.4812
SH5A-3-2	3.49	0.26	0.255	0.023	0.84804	0.0955	0.0044	1464.21	132.066	1524.96	113.607	1537.96	70.8587	263.4	0.465116	4.79502
SH5A-3-3	4.01	0.18	0.293	0.013	0.79684	0.0988	0.0031	1656.5	73.4967	1636.22	73.4465	1601.59	50.2524	256	1.23457	-3.42842
SH5A-3-4	4.1	0.21	0.3	0.016	0.75608	0.0998	0.0039	1691.31	90.2031	1654.3	84.7326	1620.36	63.3206	257	0.793651	-4.37869
SH5A-4-1*	1.885	0.081	0.1849	0.0074	0.50967	0.0745	0.0034	1093.69	43.7712	1075.82	46.229	1055.04	48.1496	66	0.201207	-3.66284
SH5A-4-2*	2.178	0.093	0.1968	0.0077	0.80995	0.0806	0.0021	1158.11	45.3121	1174.04	50.1311	1211.71	31.5706	243.1	0.244499	4.42364
SH5A-4-3*	2.422	0.089	0.2075	0.0089	0.75391	0.0833	0.0024	1215.48	52.1341	1249.15	45.9019	1276.25	36.7708	387	0.578035	4.76155
SH5A-4-4	2.69	0.12	0.229	0.01	0.82407	0.0841	0.0022	1329.26	58.0461	1325.71	59.1395	1294.87	33.8729	315	0.250627	-2.65577
SH5A-4-5	2.79	0.11	0.233	0.01	0.80684	0.0856	0.0023	1350.2	57.9486	1352.86	53.3386	1329.17	35.7136	236	0.266667	-1.58276
SH5A-4-6	2.83	0.14	0.235	0.011	0.79603	0.0866	0.0031	1360.65	63.69	1363.52	67.4534	1351.61	48.3832	229	0.277778	-0.668957
SH5A-5-1*	2.56	0.18	0.206	0.013	0.71167	0.0934	0.0038	1207.47	76.1997	1289.29	90.6534	1496.01	60.8655	158.9	0.512821	19.2872
SH5A-5-2	2.47	0.16	0.208	0.017	0.87688	0.0859	0.003	1218.15	99.5606	1263.29	81.8328	1335.93	46.6566	647	0.0769231	8.81628
SH5A-5-3	2.63	0.18	0.213	0.017	0.73003	0.0869	0.0045	1244.78	99.3487	1309.06	89.5938	1358.28	70.3366	216.8	0.322581	8.35598
SH5A-5-4	2.7	0.15	0.221	0.01	0.67134	0.0894	0.0038	1287.16	58.2424	1328.46	73.8033	1412.74	60.0495	149.9	0.520833	8.88959
SH5A-5-5	2.76	0.17	0.222	0.015	0.75041	0.0903	0.0049	1292.43	87.3266	1344.79	82.8314	1431.88	77.699	182	0.446429	9.7388
SH5A-5-6	2.7	0.17	0.222	0.016	0.76947	0.0869	0.0041	1292.43	93.1484	1328.46	83.6437	1358.28	64.0845	165.9	0.403226	4.84761
SH5A-5-7	2.8	0.13	0.229	0.012	0.81679	0.0869	0.0025	1329.26	69.6553	1355.54	62.9357	1358.28	39.0759	145	0.25641	2.1367
SH5A-5-8*	3.04	0.25	0.232	0.021	0.78075	0.094	0.0057	1344.97	121.743	1417.72	116.589	1508.11	91.4495	165.6	0.526316	10.8176
SH5A-6-1	0.522	0.029	0.0658	0.004	0.78118	0.057	0.0023	410.802	24.9728	426.487	23.6937	491.533	19.8338	480	0.119048	16.4243
SH5A-6-2	0.552	0.049	0.0664	0.0054	0.71387	0.0593	0.0043	414.43	33.7037	446.306	39.6177	578.128	41.9216	235	0.0454545	28.3151
SH5A-6-3	0.503	0.022	0.0666	0.0032	0.73312	0.0567	0.0021	415.639	19.9706	413.731	18.0956	479.884	17.7735	541	0.163934	13.3876
SH5A-6-4	0.524	0.026	0.0688	0.0032	0.62428	0.0545	0.0022	428.922	19.9499	427.82	21.2277	391.768	15.8145	443	0.204082	-9.48368
SH5A-6-5	0.534	0.023	0.0697	0.0028	0.76041	0.0565	0.0016	434.348	17.4487	434.461	18.7127	472.071	13.3684	895	0.316456	7.99087
SH5A-6-6	0.546	0.027	0.0719	0.0047	0.58165	0.0547	0.003	447.592	29.2585	442.373	21.8756	399.981	21.9368	528	0.123457	-11.9033
SH5A-6-7	0.551	0.033	0.0719	0.0036	0.8382	0.056	0.0023	447.592	22.4107	445.652	26.6906	452.368	18.5794	667	0.408163	1.05578
SH5A-6-8	0.551	0.022	0.073	0.0025	0.7433	0.0559	0.0016	454.204	15.5549	445.652	17.7937	448.399	12.8343	488	0.102041	-1.29475
SH5A-7-1	0.628	0.044	0.0789	0.0045	0.68393	0.0575	0.0033	489.554	27.9213	494.849	34.671	510.762	29.3133	156	0.0636943	4.15229
SH5A-7-2	1.86	0.1	0.1778	0.009	0.72155	0.0751	0.0029	1054.94	53.3999	1066.99	57.3649	1071.18	41.3638	345.3	0.3125	1.51557
SH5A-7-3	2.04	0.11	0.19	0.011	0.81635	0.0777	0.003	1121.38	64.9217	1128.96	60.8754	1139.21	43.9851	296	0.169492	1.56582
SH5A-7-4	1.998	0.099	0.193	0.0096	0.73649	0.0778	0.0032	1137.61	56.5856	1114.84	55.2396	1141.77	46.9623	269	0.217391	0.36475
SH5B-1-1*	4.142	0.086	0.3006	0.0073	0.70078	0.1034	0.0018	1694.28	41.1453	1662.63	34.5211	1686.03	29.3506	383	1.12867	-0.489606
SH5B-1-2	4.36	0.15	0.306	0.011	0.86565	0.1046	0.0017	1720.99	61.8658	1704.79	58.6511	1707.29	27.7476	167	0.944287	-0.802428
SH5B-1-3	4.374	0.095	0.309	0.0079	0.76608	0.1041	0.0017	1735.78	44.3776	1707.44	37.0843	1698.47	27.7368	199	1.30548	-2.19694
SH5C-1-1	0.019	0.0033	0.00196	9.7e-05	0.25529	0.07	0.012	12.6226	0.62469	19.1113	3.31933	928.353	159.146	337	1.79856	98.6403
SH5C-1-2	0.0222	0.0025	0.00197	0.0001	0.29048	0.0816	0.0086	12.6869	0.644007	22.2949	2.51069	1235.93	130.258	463	1.43472	98.9735
SH5C-1-3	0.0293	0.0034	0.002102	9.7e-05	0.19182	0.103	0.012	13.5361	0.624646	29.3232	3.40269	1678.87	195.597	417	1.1919	99.1937
SH5C-1-4	0.0371	0.004	0.00214	0.00011	0.26203	0.125	0.014	13.7806	0.708348	36.9887	3.988	2028.8	227.225	330	1.08578	99.3208
SH5C-1-5	0.0449	0.0061	0.0022	0.00015	0.093421	0.145	0.022	14.1665	0.9659	44.5968	6.05881	2287.78	347.111	159	1.72117	99.3808
SH5C-1-6	0.147	0.026	0.00311	0.0003	0.50482	0.303	0.053	20.0172	1.93092	139.26	24.631	3485.63	609.697	139	1.61031	99.4257
SH5C-2-1	0.168	0.011	0.02506	0.00061	0.31469	0.0477	0.0027	159.556	3.88385	157.682	10.3244	84.4158	4.77825	315	1.49925	-89.0123
SH5C-2-2	0.1763	0.0078	0.02555	0.00076	0.55022	0.0502	0.002	162.637	4.83773	164.872	7.29438	204.264	8.13802	362	1.47059	20.3791
SH5C-2-3	0.1801	0.0089	0.02567	0.00063	0.46638	0.0533	0.0021	163.391	4.00999	168.147	8.3093	341.589	13.4585	355	1.45138	52.1673
SH5C-2-4	0.211	0.012	0.02622	0.0006	0.32478	0.0583	0.0033	166.847	3.81801	194.391	11.0554	541.054	30.6257	367	1.94175	69.1626
Trinity College, Dublin: Standards
WRS 1348	0.693	0.033	0.0863	0.0026	0.16805	0.0576	0.0029	533.618	16.0765	534.601	25.4572	514.58	25.9077	95.8	1.23916	-3.69962
WRS 1348	0.681	0.038	0.0855	0.0025	0.55176	0.0575	0.0023	528.868	15.464	527.379	29.4279	510.762	20.4305	105	1.50376	-3.54499
WRS 1348	0.728	0.031	0.0865	0.0025	0.27509	0.0605	0.0026	534.804	15.4568	555.379	23.6494	621.505	26.7093	111.9	1.58983	13.95
WRS 1348	0.683	0.033	0.0839	0.0027	0.44721	0.0588	0.0026	519.36	16.7136	528.586	25.5393	559.699	24.7486	105	1.23153	7.20733
WRS 1348	0.68	0.027	0.0846	0.0022	0.38916	0.0591	0.0027	523.521	13.614	526.774	20.916	570.782	26.0763	119.8	1.5528	8.27994
WRS 1348	0.688	0.037	0.0851	0.0033	0.60932	0.058	0.0025	526.492	20.4163	531.598	28.5889	529.762	22.8346	117	1.35685	0.617146
WRS 1348	0.664	0.03	0.0822	0.0025	0.16513	0.0592	0.0029	509.241	15.4879	517.058	23.361	574.459	28.1407	112.9	1.5015	11.3529
WRS 1348	0.705	0.03	0.0844	0.0023	0.3277	0.0602	0.0028	522.333	14.2342	541.773	23.0542	610.771	28.4079	105.2	1.19617	14.4798
WRS 1348	0.636	0.032	0.0878	0.0022	0.22577	0.054	0.003	542.513	13.5937	499.827	25.1485	371.05	20.6139	110	1.23305	-46.2103
WRS 1348	0.693	0.032	0.0845	0.0028	0.51804	0.0595	0.0024	522.927	17.3278	534.601	24.6858	585.44	23.6144	121.1	1.49254	10.6779
WRS 1348	0.664	0.035	0.0878	0.0028	0.47392	0.0553	0.0027	542.513	17.3011	517.058	27.2546	424.372	20.7198	115.2	1.38696	-27.8389
WRS 1348	0.691	0.032	0.0849	0.0028	0.49174	0.0591	0.0027	525.304	17.3245	533.401	24.7016	570.782	26.0763	107.3	1.12994	7.96759
WRS 1348	0.694	0.032	0.0881	0.0022	0.37665	0.0583	0.0023	544.29	13.5918	535.201	24.6779	541.054	21.3452	115.3	1.51286	-0.598128
WRS 1348	0.686	0.037	0.0868	0.0034	0.45276	0.0574	0.0032	536.584	21.0183	530.394	28.6073	506.935	28.2612	120.3	1.39276	-5.84876
Plešovice	0.392	0.016	0.0538	0.002	0.66655	0.0529	0.0017	337.809	12.558	335.829	13.7073	324.51	10.4285	866	0.120773	-4.09827
Plešovice	0.397	0.014	0.0555	0.0019	0.71338	0.0528	0.0015	348.2	11.9204	339.47	11.9712	320.212	9.09693	827	0.123457	-8.7406
Plešovice	0.411	0.018	0.056	0.0023	0.77552	0.0536	0.0016	351.253	14.4265	349.595	15.3107	354.281	10.5756	899	0.120773	0.854559
Plešovice	0.4	0.017	0.0555	0.0024	0.71286	0.0517	0.0017	348.2	15.0573	341.648	14.52	272.164	8.9493	985	0.111111	-27.9377
Plešovice	0.412	0.013	0.0551	0.0015	0.62435	0.0554	0.0016	345.757	9.41262	350.314	11.0536	428.402	12.3726	896	0.126103	19.2914
Plešovice	0.403	0.013	0.0552	0.0014	0.65838	0.0538	0.0012	346.368	8.78469	343.822	11.091	362.687	8.08967	920	0.125156	4.49951
Plešovice	0.409	0.016	0.0548	0.0021	0.64593	0.0531	0.0016	343.924	13.1796	348.155	13.6197	333.072	10.0361	1115	0.126904	-3.25804
Plešovice	0.407	0.013	0.0528	0.0012	0.54942	0.0552	0.0014	331.689	7.53839	346.712	11.0744	420.333	10.6606	852	0.11655	21.0889
Plešovice	0.392	0.012	0.0529	0.0015	0.65874	0.0546	0.0015	332.301	9.42254	335.829	10.2805	395.88	10.8758	928	0.116959	16.06
Temora 2	0.501	0.014	0.0661	0.0013	0.18753	0.0557	0.0017	412.616	8.115	412.379	11.5236	440.43	13.4422	311	0.750751	6.31507
Temora 2	0.511	0.016	0.0664	0.0015	0.48777	0.0555	0.0017	414.43	9.36213	419.121	13.1232	432.421	13.2453	311	0.748503	4.16053
Temora 2	0.491	0.018	0.0644	0.0015	0.22538	0.0556	0.0021	402.329	9.37101	405.592	14.8689	436.431	16.4839	263	0.78064	7.81378
Temora 2	0.508	0.022	0.0677	0.0016	0.48658	0.0557	0.0024	422.284	9.98012	417.103	18.0635	440.43	18.9772	277	0.581395	4.12005
Temora 2	0.509	0.024	0.0665	0.0023	0.60809	0.0552	0.0022	415.035	14.3546	417.776	19.6987	420.333	16.7524	256	0.617284	1.26047
Temora 2	0.511	0.018	0.0668	0.0018	0.62104	0.0563	0.0017	416.848	11.2324	419.121	14.7636	464.219	14.0173	477	0.738007	10.2045
Temora 2	0.481	0.02	0.0679	0.0016	0.40497	0.0526	0.0022	423.491	9.97918	398.759	16.5804	311.581	13.0319	187.7	0.743494	-35.9168
Temora 2	0.506	0.018	0.0658	0.0011	-0.014467	0.0551	0.0022	410.802	6.86751	415.756	14.7897	416.283	16.6211	214.7	0.788022	1.31663
91500 Zircon	1.795	0.086	0.176	0.0065	0.53672	0.0735	0.003	1045.09	38.5969	1043.64	50.0019	1027.77	41.9498	82.8	0.27027	-1.68462
91500 Zircon	1.874	0.08	0.1803	0.0056	0.33731	0.0755	0.0029	1068.61	33.1904	1071.94	45.7607	1081.84	41.5542	82.5	0.378788	1.2229
91500 Zircon	1.88	0.072	0.1774	0.0085	0.69731	0.0753	0.0024	1052.75	50.442	1074.06	41.1343	1076.52	34.3114	82.2	0.357143	2.20761
91500 Zircon	1.821	0.084	0.1774	0.0063	0.37578	0.0755	0.0036	1052.75	37.3865	1053.05	48.5754	1081.84	51.5846	78	0.373134	2.68877
91500 Zircon	1.873	0.091	0.186	0.007	0.64558	0.0743	0.0028	1099.67	41.3854	1071.59	52.0634	1049.63	39.5553	75.2	0.401606	-4.76764
91500 Zircon	1.881	0.077	0.1837	0.0075	0.49002	0.0746	0.0029	1087.16	44.3858	1074.41	43.9819	1057.74	41.1188	79.7	0.3663	-2.78061
91500 Zircon	1.792	0.081	0.1754	0.0069	0.4486	0.0734	0.0034	1041.8	40.9828	1042.55	47.1243	1025.02	47.4804	82.6	0.387597	-1.63685
91500 Zircon	1.868	0.098	0.1803	0.0066	0.58932	0.0755	0.003	1068.61	39.1173	1069.82	56.1256	1081.84	42.9871	80.3	0.330033	1.2229
91500 Zircon	1.84	0.072	0.1763	0.0062	0.5663	0.0751	0.0025	1046.73	36.8107	1059.86	41.4728	1071.18	35.6584	81.3	0.321543	2.28249
91500 Zircon	1.882	0.095	0.1789	0.007	0.56697	0.0766	0.0033	1060.96	41.5133	1074.77	54.2523	1110.8	47.8541	77.4	0.4	4.48621
91500 Zircon	1.86	0.07	0.1792	0.0071	0.3579	0.0764	0.0029	1062.6	42.1009	1066.99	40.1554	1105.57	41.9654	80.6	0.380228	3.88656
91500 Zircon	1.832	0.077	0.1804	0.0074	0.65848	0.0735	0.0023	1069.16	43.8569	1057	44.4262	1027.77	32.1615	80.5	0.289017	-4.02699
Arizona LaserChron Center: Metabasite Zircons LA-MC-ICPMS
SH5C-2-1	3.06833	0.053239	0.246584	0.00378602	0.884892	0.0902869	0.000729708	1420.84	78.3143	1424.82	53.1531	1431.59	61.6912	173.116	0.465083	0.751009
SH5C-2-2	3.04865	0.057317	0.244349	0.00402705	0.876601	0.0905286	0.000819038	1409.27	83.4497	1419.9	57.5032	1436.69	69.0112	179.458	0.556331	1.90864
SH5C-3-1	3.99632	0.0869827	0.286808	0.0056924	0.911865	0.101101	0.000903299	1625.56	114.068	1633.45	70.7158	1644.41	66.3102	177.129	0.51335	1.14636
SH5B-2-1	0.0145891	0.00071151	0.00196986	5.46458e-05	0.568812	0.0537379	0.00215552	12.686	1.40631	14.7065	2.84827	360.061	362.161	131.271	0.769175	96.4767
SH5B-3-1	0.0364347	0.00107496	0.00539751	0.000115591	0.725858	0.0489789	0.000993977	34.701	2.96458	36.3372	4.2125	146.844	190.436	551.607	2.14764	76.3688
SH5B-3-2	0.0349239	0.000914894	0.00543659	0.000123066	0.8641	0.0466105	0.000614576	34.9516	3.15618	34.856	3.59048	29.3199	126.375	889.219	3.13268	-19.2076
SH5B-4-1	0.0342398	0.00238292	0.00544651	0.000127622	0.33669	0.0456143	0.00298919	35.0152	3.273	34.1846	9.35793	-	-	165.164	1.49233	-
SH5B-5-1	0.0976397	0.00216348	0.0145835	0.000265354	0.821177	0.0485793	0.000614278	93.3326	6.74397	94.5953	8.0054	127.6	118.971	631.562	0.969098	26.8552
SH5B-5-2	0.102011	0.00301203	0.0148565	0.000384488	0.876505	0.0498217	0.00070816	95.0666	9.76914	98.6308	11.1011	186.66	132.39	550.765	0.793252	49.0697
SH5B-6-1	0.115926	0.00396758	0.0165694	0.000350476	0.618026	0.0507647	0.00136589	105.938	8.88994	111.372	14.4405	230.139	248.629	180.634	0.824263	53.9678
SH5B-7-1	0.187732	0.00581196	0.0282227	0.000579983	0.663791	0.0482644	0.00111755	179.415	14.5447	174.692	19.8746	112.263	218.617	80.5211	0.673821	-59.8167
SH5B-7-2	0.183496	0.00506492	0.0289298	0.000531663	0.665803	0.0460225	0.000947825	183.847	13.3238	171.065	17.3819	-	-	69.7189	0.641986	-
SH5B-8-1	2.10282	0.0487238	0.19587	0.00409755	0.902851	0.077897	0.000776037	1153.1	88.3528	1149.73	63.7839	1144.23	79.128	46.943	0.540223	-0.774943
SH5B-9-1	2.5049	0.0795752	0.205867	0.00608829	0.930939	0.0882859	0.00102418	1206.76	130.19	1273.46	92.2287	1388.7	89.0741	764.286	0.0512059	13.1011
SH5B-10-1	3.23665	0.0680846	0.255542	0.00493127	0.917368	0.0919013	0.000769488	1466.99	101.276	1465.98	65.276	1465.33	63.6214	241.849	0.368696	-0.11355
SH5B-11-1	4.32075	0.0989071	0.297012	0.00623984	0.917765	0.105554	0.000959551	1676.47	124.054	1697.33	75.5083	1723.96	66.7906	240.713	0.371041	2.75477
Arizona LaserChron Center: Standards
Duluth Gabbro	1.905	0.0747119	0.183374	0.00609522	0.847535	0.0753782	0.00156899	1085.38	33.2037	1082.84	26.1154	1078.62	41.7366	262.843	0.653985	-0.626632
Duluth Gabbro	1.90633	0.08899	0.181651	0.00765426	0.90266	0.0761464	0.00152974	1075.99	41.7574	1083.3	31.0928	1098.94	40.2091	82.0194	0.426693	2.08877
Duluth Gabbro	1.90788	0.0723602	0.182379	0.00613038	0.886267	0.075904	0.00133339	1079.96	33.4233	1083.85	25.2682	1092.52	35.1435	150.667	0.547388	1.14978
Duluth Gabbro	1.95587	0.102734	0.185951	0.00916895	0.938738	0.0763182	0.00138153	1099.4	49.8394	1100.46	35.2943	1103.41	36.2123	217.273	0.606852	0.362924
Duluth Gabbro	1.96513	0.0904343	0.185334	0.00795827	0.933087	0.0769351	0.00127335	1096.05	43.2811	1103.64	30.9708	1119.53	33.0355	245.902	0.646145	2.0971
Duluth Gabbro	1.95514	0.0871654	0.185854	0.00733947	0.885781	0.0763297	0.00157934	1098.88	39.8982	1100.21	29.9521	1103.71	41.4083	117.248	0.607444	0.437996
Duluth Gabbro	1.93431	0.0939998	0.18782	0.00829828	0.90917	0.0747261	0.0015122	1109.55	45.0357	1093.03	32.5303	1061.16	40.7326	123.708	0.511017	-4.56043
Duluth Gabbro	1.94383	0.0858105	0.185249	0.00741506	0.90673	0.0761363	0.00141739	1095.58	40.3297	1096.32	29.5997	1098.67	37.2865	233.781	0.652203	0.281021
Duluth Gabbro	1.96515	0.0852671	0.186848	0.00754926	0.931176	0.0763127	0.00120715	1104.27	41.0043	1103.65	29.2008	1103.29	31.6678	141.468	0.514579	-0.08906
Duluth Gabbro	1.97033	0.0978663	0.186917	0.00851579	0.917237	0.0764853	0.00151331	1104.65	46.2514	1105.42	33.4579	1107.79	39.5089	219.984	0.55474	0.2831
Duluth Gabbro	1.94521	0.0870361	0.184641	0.00760253	0.920233	0.076441	0.00133859	1092.28	41.3706	1096.8	30.0085	1106.63	34.9613	307.005	0.517648	1.29661
Duluth Gabbro	1.97401	0.0922023	0.186929	0.00783875	0.897794	0.076623	0.00157621	1104.72	42.5737	1106.68	31.4821	1111.38	41.0891	399.215	0.611206	0.598897
Duluth Gabbro	1.95297	0.0922192	0.187649	0.00812624	0.917102	0.0755158	0.00142153	1108.63	44.1084	1099.47	31.7123	1082.27	37.7198	92.0187	0.415016	-2.43553
Duluth Gabbro	2.00863	0.0932656	0.188832	0.00788389	0.899172	0.0771812	0.00156822	1115.04	42.7504	1118.43	31.4788	1125.86	40.5177	372.109	0.610104	0.960284
Duluth Gabbro	1.86243	0.0915379	0.180557	0.00786412	0.886166	0.0748434	0.00170452	1070.02	42.9421	1067.85	32.4738	1064.32	45.8059	110.363	0.349308	-0.535346
Duluth Gabbro	1.93911	0.0970531	0.185209	0.00850043	0.917003	0.0759673	0.00151662	1095.37	46.2345	1094.69	33.5323	1094.23	39.9362	286.249	0.596003	-0.104446
Duluth Gabbro	1.93616	0.0852233	0.186601	0.00720411	0.877098	0.0752859	0.00159168	1102.94	39.1377	1093.67	29.474	1076.16	42.4377	136.535	0.374868	-2.48785
Duluth Gabbro	1.93765	0.102603	0.184866	0.00889379	0.908537	0.076051	0.00168254	1093.5	48.388	1094.19	35.468	1096.4	44.2839	99.8976	0.318591	0.263841
Duluth Gabbro	1.91339	0.0840376	0.183845	0.00722399	0.894658	0.0755164	0.00148176	1087.94	39.3371	1085.77	29.291	1082.28	39.358	119.744	0.35525	-0.523046
Duluth Gabbro	1.99173	0.0782384	0.188382	0.006683	0.903114	0.0767148	0.00129399	1112.6	36.2523	1112.71	26.5554	1113.77	33.649	240.466	0.575442	0.104512
Duluth Gabbro	2.01324	0.0868137	0.190357	0.0076464	0.93153	0.076739	0.0012034	1123.31	41.4095	1119.98	29.256	1114.4	31.3341	406.917	0.618247	-0.799537
Braintree	0.515948	0.0244499	0.0663965	0.00286924	0.911907	0.056383	0.00109654	414.409	17.3447	422.441	16.3769	467.473	43.1103	1005.32	0.48659	11.3513
Braintree	0.510997	0.0254099	0.0663558	0.00308954	0.936333	0.0558762	0.000975572	414.163	18.6772	419.119	17.0757	447.43	38.841	973.301	0.554682	7.43508
Braintree	0.530396	0.0260145	0.0690038	0.00319605	0.944333	0.0557718	0.000899938	430.151	19.2731	432.072	17.2604	443.275	35.8824	780.395	0.65953	2.96069
Braintree	0.525452	0.0189585	0.0677485	0.00218034	0.891978	0.0562757	0.000917922	422.577	13.1636	428.787	12.6195	463.286	36.1474	701.147	0.672787	8.78694
Braintree	0.4986	0.0198511	0.0649735	0.00227747	0.880407	0.0556805	0.00105127	405.801	13.7858	410.754	13.4504	439.631	42.0136	781.612	0.672047	7.69499
Braintree	0.505865	0.0184988	0.0658788	0.00218832	0.908352	0.0557156	0.000852074	411.279	13.2349	415.665	12.4737	441.03	34.0456	1300.35	0.671812	6.74581
Braintree	0.530722	0.0245456	0.0679657	0.00275253	0.87566	0.0566584	0.00126547	423.888	16.6147	432.288	16.2823	478.242	49.3908	914.464	0.762221	11.3654
Sri Lanka Zircon	0.769556	0.0369748	0.0933974	0.00392361	0.874349	0.0597851	0.00139401	575.599	23.1327	579.508	21.2172	595.823	50.521	215.557	0.629218	3.39429
Sri Lanka Zircon	0.703257	0.0391412	0.0873452	0.00454337	0.934583	0.0584201	0.0011567	539.817	26.9358	540.734	23.3348	545.556	43.3057	166.417	0.156635	1.05187
Sri Lanka Zircon	0.740283	0.0502714	0.0926256	0.00587552	0.934098	0.0579902	0.00140594	571.046	34.6653	562.571	29.3333	529.414	53.1295	217.342	0.655594	-7.8638
Sri Lanka Zircon	0.758288	0.0453708	0.0926398	0.00481705	0.869042	0.0593915	0.00175809	571.131	28.4199	573.022	26.2024	581.474	64.2941	34.4811	0.290325	1.77886
Sri Lanka Zircon	0.769932	0.0382927	0.0932579	0.00431381	0.930061	0.0599038	0.00109462	574.776	25.4365	579.724	21.9688	600.08	39.5202	215.348	0.666742	4.21669
Sri Lanka Zircon	0.716678	0.0397265	0.089867	0.00476618	0.956784	0.0578644	0.00093274	554.751	28.1913	548.704	23.4985	524.612	35.3575	442.072	0.18205	-5.74494
Sri Lanka Zircon	0.717583	0.0317967	0.0891987	0.00338819	0.857235	0.0583716	0.00133185	550.796	20.053	549.239	18.7978	543.726	49.914	185.911	0.177146	-1.30031
Sri Lanka Zircon	0.72708	0.0316987	0.0900363	0.0033526	0.854094	0.0585939	0.00132866	555.752	19.8271	554.838	18.6368	552.02	49.4954	151.808	0.153304	-0.675915
Sri Lanka Zircon	0.731215	0.028063	0.0906332	0.00303751	0.873254	0.058539	0.00109471	559.281	17.9538	557.266	16.4597	550.007	40.822	444.841	0.17716	-1.68618
Sri Lanka Zircon	0.699095	0.0298245	0.0858042	0.00324329	0.886012	0.0591174	0.00116938	530.675	19.2554	538.25	17.8237	571.412	43.0338	164.816	0.147045	7.12915
Sri Lanka Zircon	0.724994	0.0303628	0.0889674	0.00326461	0.876178	0.0591278	0.00119353	549.427	19.3257	553.611	17.8729	571.803	43.9389	440.112	0.181728	3.91318
Sri Lanka Zircon	0.742271	0.0293266	0.0913111	0.00321271	0.890529	0.058983	0.00106015	563.286	18.9776	563.73	17.0917	566.489	39.1766	148.808	0.150502	0.565459
Sri Lanka Zircon	0.743681	0.0351012	0.0915601	0.00389399	0.901058	0.0589343	0.0012064	564.757	22.9967	564.551	20.4409	564.648	44.5693	150.042	0.154399	-0.0194225
Published Standard Ages:
Duluth Gabbro, 1099 ± 2 Ma (Paces and Miller, 1993); Braintree diorite, 419.26 ± 0.39 Ma (Black et al., 2004); Sri Lanka zircon, 563.5 ± 2.3 Ma (Gehrels et al., 2008);
WRS 1348, 526.26 ± 0.70 Ma (Pointon et al., 2012); Plešovice, 337.13 ± 0.37 Ma (Chew et al., 2017); Temora 2, 416.8 ± 1.3 Ma (Black et al., 2003);
91500 Zircon, 1065.4 ± 0.6 Ma (Wiedenbeck et al., 1995)

## Sheet: Table S3
Table S3: Isotopic age data, including standards, for U-Pb zircon by Laser Ablation Inductively Coupled Mass Spectrometry of detrital zircons from the Horse Thief and Crystal Spring Formations in the Silurian Hills and Black Mountains, Death Valley, USA.
	Isotopic Ratios							Age/Ma						Concentrations		Disc.
Sample - Grain	207Pb/235U	2σ	206Pb/238U	2σ	ρ	207Pb/206Pb	2σ	206Pb/238U	2σ	207Pb/235U	2σ	207Pb/206Pb	2σ	U/ppm	Th/U	%
LA-ICPMS from Trinity College, Dublin: DZ-SH1 (Basal Conglomerate, Crystal Spring Formation, Silurian Hills)
DZ-SH1-01	3.37	0.15	0.2433	0.0098	0.60984	0.101	0.0041	1403.83	113.091	1497.45	133.304	1642.57	133.357	154	0.52356	14.5345
DZ-SH1-02	4.23	0.13	0.293	0.0071	0.5846	0.1045	0.0023	1656.5	80.2811	1679.86	103.254	1705.53	75.0761	124.5	0.529101	2.87471
DZ-SH1-03	4.16	0.12	0.2935	0.0068	0.65909	0.1017	0.0023	1659	76.8734	1666.18	96.1257	1655.38	74.8744	232.2	0.653595	-0.218664
DZ-SH1-04	4.121	0.085	0.2971	0.0084	0.51412	0.1019	0.0028	1676.91	94.8237	1658.48	68.4156	1659.01	91.1726	417	0.693481	-1.07878
DZ-SH1-05	4.227	0.09	0.2947	0.0057	0.56474	0.1037	0.002	1664.97	64.4068	1679.28	71.5094	1691.37	65.241	237	1.15741	1.56084
DZ-SH1-06	4.281	0.096	0.3045	0.0054	0.65279	0.1027	0.0021	1713.58	60.7774	1689.71	75.7826	1673.48	68.4384	194	0.529101	-2.39631
DZ-SH1-07	4.26	0.12	0.2985	0.0068	0.01	0.1031	0.0029	1683.87	76.7189	1685.67	94.9673	1680.66	94.5476	225	0.581395	-0.190499
DZ-SH1-08	2.935	0.089	0.2323	0.0077	0.11571	0.0907	0.0041	1346.54	89.2671	1390.98	84.3595	1440.31	130.216	92	1.3624	6.51035
DZ-SH1-09	4.161	0.083	0.2978	0.0069	0.72912	0.102	0.0017	1680.39	77.869	1666.38	66.4788	1660.83	55.361	504	0.578369	-1.17766
DZ-SH1-10	3.53	0.11	0.2482	0.0072	0.72726	0.1025	0.002	1429.19	82.9181	1533.96	95.601	1669.88	65.166	483	1.14943	14.4138
DZ-SH1-11	1.714	0.066	0.107	0.0038	0.81012	0.1167	0.0029	655.302	46.5448	1013.78	78.0743	1906.28	94.7424	1180	0.0555864	65.6241
DZ-SH1-12	4.07	0.1	0.2884	0.0063	0.5646	0.1022	0.0022	1633.53	71.3678	1648.31	80.9982	1664.46	71.6596	320	0.440529	1.85815
DZ-SH1-13	4.334	0.093	0.2975	0.0072	0.61272	0.1057	0.0022	1678.9	81.2644	1699.85	72.9517	1726.52	71.8704	550	0.487805	2.75835
DZ-SH1-14	3.79	0.11	0.2695	0.0072	0.9488	0.102	0.0019	1538.26	82.1929	1590.63	92.332	1660.83	61.8741	540	0.423729	7.3799
DZ-SH1-15	2.87	0.11	0.232	0.011	0.909	0.0889	0.0017	1344.97	127.54	1374.07	105.33	1402.01	53.62	298	1.69492	4.06799
DZ-SH1-16	4.18	0.16	0.299	0.013	0.77516	0.1026	0.0035	1686.35	146.639	1670.11	127.855	1671.68	114.052	202.7	0.502513	-0.877324
DZ-SH1-17	4.197	0.068	0.2982	0.0057	0.6737	0.1028	0.0016	1682.38	64.3162	1673.43	54.2261	1675.28	52.1488	320	0.462963	-0.423525
DZ-SH1-18	2.942	0.087	0.2422	0.0051	0.61033	0.0894	0.002	1398.12	58.8805	1392.79	82.3743	1412.74	63.21	123.3	1.76367	1.03485
DZ-SH1-19	4.22	0.11	0.2955	0.0061	0.59039	0.104	0.0022	1668.96	68.9044	1677.92	87.4744	1696.7	71.7834	342	1.0846	1.63512
DZ-SH1-20	4.16	0.12	0.293	0.0087	0.82552	0.1026	0.002	1656.5	98.3726	1666.18	96.1257	1671.68	65.1728	358	0.561167	0.907978
DZ-SH1-21	4.37	0.13	0.298	0.015	0.65039	0.1065	0.004	1681.38	169.267	1706.68	101.542	1740.36	130.731	257	0.49505	3.38848
DZ-SH1-22	2.976	0.059	0.2423	0.0041	0.50846	0.0889	0.0015	1398.64	47.3334	1401.51	55.5706	1402.01	47.3118	433	1.5361	0.239867
DZ-SH1-23	4.225	0.068	0.2938	0.0059	0.65522	0.1043	0.0015	1660.49	66.6909	1678.89	54.0424	1702.01	48.9551	421	0.491159	2.43915
DZ-SH1-24	2.865	0.06	0.2367	0.0038	0.41685	0.0871	0.0016	1369.52	43.9727	1372.76	57.4978	1362.71	50.0651	416	0.953289	-0.49976
DZ-SH1-25	2.46	0.11	0.1753	0.0078	0.8002	0.1003	0.0029	1041.25	92.6609	1260.36	112.715	1629.65	94.2372	830	0.16	36.1062
DZ-SH1-26	4.21	0.095	0.3008	0.0067	0.58066	0.1024	0.0021	1695.27	75.5209	1675.97	75.6376	1668.07	68.4171	266	1	-1.63067
DZ-SH1-27	2.29	0.11	0.1893	0.0094	0.9148	0.0886	0.0017	1117.58	110.991	1209.21	116.168	1395.53	53.5529	509	1.8797	19.9168
DZ-SH1-28	2.07	0.11	0.17	0.01	0.88772	0.0879	0.0023	1012.11	119.072	1138.93	121.046	1380.3	72.2341	477	0.869565	26.6745
DZ-SH1-29	4.11	0.13	0.2922	0.008	0.71796	0.1021	0.0024	1652.51	90.4867	1656.29	104.778	1662.65	78.1655	88.1	0.978474	0.609351
DZ-SH1-30	3.85	0.14	0.272	0.01	0.76287	0.1021	0.0025	1550.95	114.04	1603.27	116.601	1662.65	81.4224	427	0.769231	6.71817
DZ-SH1-31	2.2	0.063	0.1818	0.0048	0.76004	0.0875	0.0017	1076.8	56.8608	1181.04	67.6416	1371.53	53.2937	468	2	21.4891
DZ-SH1-32	2.901	0.072	0.2413	0.0041	0.36648	0.0869	0.0019	1393.45	47.3531	1382.17	68.6084	1358.28	59.3954	97.7	1.26582	-2.58957
DZ-SH1-33	2.995	0.088	0.2418	0.0065	0.78304	0.0903	0.0018	1396.05	75.0563	1406.35	82.6436	1431.88	57.085	213.9	1.34048	2.50261
DZ-SH1-34	2.428	0.06	0.172	0.0041	0.72906	0.1032	0.002	1023.12	48.7767	1250.93	61.8251	1682.45	65.2114	412	0.460829	39.1888
DZ-SH1-35	2.768	0.084	0.1885	0.005	0.35344	0.1074	0.0033	1113.24	59.058	1346.95	81.7513	1755.76	107.896	520	0.609385	36.5949
DZ-SH1-36	4.478	0.096	0.3056	0.0073	0.51935	0.1069	0.0026	1719.02	82.1259	1726.9	74.0432	1747.22	84.9912	689	0.874126	1.61426
DZ-SH1-37	3.78	0.11	0.2717	0.0077	0.5225	0.1009	0.0033	1549.43	87.8217	1588.51	92.4528	1640.73	107.322	437	0.901713	5.56497
DZ-SH1-38	2.15	0.13	0.175	0.013	0.79445	0.089	0.004	1039.6	154.455	1165.05	140.89	1404.16	126.217	298	0.684932	25.9627
DZ-SH1-39	2.975	0.087	0.2481	0.0074	0.66794	0.0878	0.002	1428.67	85.225	1401.25	81.9557	1378.11	62.7841	100.9	0.773994	-3.66865
DZ-SH1-40	4.06	0.1	0.2885	0.0068	0.69699	0.1027	0.0018	1634.03	77.0288	1646.31	81.0989	1673.48	58.6615	402	0.43535	2.35759
DZ-SH1-41	4.52	0.11	0.313	0.011	0.67114	0.1039	0.0027	1755.45	123.386	1734.66	84.4303	1694.93	88.0905	179	0.726216	-3.57108
DZ-SH1-42	3.68	0.16	0.26	0.01	0.90392	0.1006	0.0023	1489.84	114.603	1567.04	136.264	1635.2	74.7707	194	0.763359	8.88946
DZ-SH1-43	4.32	0.1	0.3002	0.0063	0.60288	0.1043	0.0023	1692.3	71.0293	1697.19	78.5734	1702.01	75.0645	195	0.630915	0.570202
DZ-SH1-44	4.47	0.16	0.306	0.011	0.8193	0.1074	0.002	1720.99	123.732	1725.42	123.52	1755.76	65.3916	207	0.769231	1.98038
DZ-SH1-45	2.96	0.1	0.2466	0.0077	0.7299	0.0878	0.0024	1420.92	88.7353	1397.41	94.4199	1378.11	75.341	233	0.972763	-3.10613
DZ-SH1-46	2.707	0.095	0.2147	0.0059	0.56329	0.0882	0.0022	1253.81	68.9099	1330.38	93.3771	1386.84	69.185	415.3	0.970874	9.59264
DZ-SH1-47	4.64	0.14	0.312	0.011	0.51091	0.1072	0.0032	1750.54	123.436	1756.49	105.995	1752.35	104.618	316	0.929368	0.103417
DZ-SH1-48	0.854	0.063	0.0583	0.0042	0.7012	0.1027	0.0043	365.279	52.6302	626.842	92.4849	1673.48	140.136	2890	0.2	78.1725
DZ-SH1-49	4.075	0.085	0.2908	0.0068	0.7312	0.1021	0.0017	1645.53	76.9572	1649.31	68.8057	1662.65	55.3672	461	0.579374	1.02964
DZ-SH1-50	2.975	0.049	0.2436	0.0047	0.55856	0.0886	0.0017	1405.39	54.2308	1401.25	46.1589	1395.53	53.5529	309	0.640615	-0.706454
DZ-SH1-51	3.56	0.11	0.256	0.01	0.87699	0.1021	0.0026	1469.34	114.793	1540.66	95.2096	1662.65	84.6793	663	0.537634	11.6261
DZ-SH1-52	4.172	0.092	0.298	0.0068	0.52453	0.1028	0.0024	1681.38	76.7343	1668.54	73.5884	1675.28	78.2233	284	0.724638	-0.364239
DZ-SH1-53	3.56	0.18	0.248	0.01	0.60813	0.1045	0.0037	1428.15	115.174	1540.66	155.797	1705.53	120.775	357	0.712758	16.2635
DZ-SH1-54	4.252	0.09	0.2946	0.0053	0.62526	0.1041	0.0021	1664.48	59.8895	1684.12	71.294	1698.47	68.5262	469	0.558659	2.00145
DZ-SH1-55	3.53	0.18	0.242	0.012	0.84786	0.1032	0.003	1397.09	138.554	1533.96	156.438	1682.45	97.8171	464	0.66357	16.9614
DZ-SH1-56	2.067	0.076	0.1661	0.0047	0.78151	0.089	0.0022	990.587	56.0597	1137.94	83.6801	1404.16	69.4191	604	1.12994	29.4534
DZ-SH1-57	3.31	0.22	0.231	0.011	0.55849	0.1002	0.0053	1339.74	127.594	1483.41	197.191	1627.8	172.202	111.1	0.552486	17.6963
DZ-SH1-58	2.225	0.095	0.1812	0.0079	0.84181	0.0891	0.0028	1073.53	93.6078	1188.95	101.528	1406.31	88.3876	466	0.625	23.6636
DZ-SH1-59	4.18	0.1	0.2928	0.008	0.62173	0.1054	0.0028	1655.51	90.4648	1670.11	79.9094	1721.3	91.4544	425	0.735294	3.82251
DZ-SH1-60	4.234	0.072	0.2984	0.0058	0.476	0.1024	0.0019	1683.37	65.4393	1680.64	57.1591	1668.07	61.9012	225	0.632111	-0.916987
DZ-SH1-61	2.986	0.061	0.2019	0.0048	0.40598	0.1074	0.0027	1185.52	56.3694	1404.06	57.3661	1755.76	88.2786	678	0.611247	32.4784
DZ-SH1-62	1.42	0.051	0.1174	0.0047	0.8805	0.0875	0.0018	715.581	57.2953	897.363	64.4584	1371.53	56.4286	716	1.3369	47.826
DZ-SH1-63	2.988	0.06	0.2428	0.0051	0.54494	0.0897	0.0018	1401.24	58.8658	1404.57	56.4084	1419.15	56.9559	119.4	1.80832	1.26225
DZ-SH1-64	4.22	0.14	0.301	0.01	0.82361	0.1008	0.0021	1696.27	112.709	1677.92	111.331	1638.89	68.2871	315	0.404858	-3.50084
DZ-SH1-65	4.73	0.19	0.317	0.013	0.72354	0.1073	0.003	1775.06	145.589	1772.57	142.405	1754.06	98.0835	269	0.561798	-1.19734
DZ-SH1-66	4.14	0.11	0.2912	0.0066	0.62596	0.1026	0.0025	1647.52	74.6817	1662.24	88.3314	1671.68	81.466	246	0.600601	1.44518
DZ-SH1-67	2.986	0.085	0.2402	0.0052	0.67007	0.0905	0.0019	1387.74	60.0852	1404.06	79.9364	1436.1	60.3004	110.4	1.45138	3.36787
DZ-SH1-68	4.09	0.15	0.2868	0.0099	0.71568	0.1038	0.0027	1625.52	112.222	1652.31	121.196	1693.15	88.083	173.8	0.613497	3.99445
LA-ICPMS from Trinity College, Dublin: DZ-SH2 (Arkose Member, Crystal Spring Formation, Silurian Hills)
DZ-SH2-01	4.21	0.11	0.2912	0.007	0.73525	0.105	0.0019	1647.52	79.2078	1675.97	87.5804	1714.31	62.0419	300	0.680272	3.89611
DZ-SH2-02	4.69	0.12	0.313	0.0088	0.67765	0.1081	0.0024	1755.45	98.7092	1765.46	90.3432	1767.64	78.4891	247	0.469484	0.689421
DZ-SH2-03	3.683	0.092	0.2632	0.0075	0.77801	0.1029	0.002	1506.19	85.8393	1567.69	78.3206	1677.08	65.1925	672	1.0989	10.1895
DZ-SH2-04	4.51	0.22	0.304	0.015	0.76823	0.1085	0.0034	1711.11	168.86	1732.82	169.055	1774.38	111.206	222	1.71527	3.56571
DZ-SH2-05	3.92	0.1	0.2713	0.0069	0.65203	0.1058	0.0025	1547.4	78.7102	1617.82	82.5418	1728.26	81.6758	820	0.712251	10.465
DZ-SH2-06	4.91	0.11	0.3195	0.0062	0.50383	0.1127	0.0025	1787.29	69.3658	1803.98	80.8299	1843.4	81.7837	266	0.671141	3.04422
DZ-SH2-07	4.043	0.076	0.2875	0.0063	0.48488	0.1031	0.0021	1629.02	71.3937	1642.89	61.7659	1680.66	68.4655	218.3	0.772201	3.07263
DZ-SH2-08	2.617	0.056	0.2294	0.0067	0.32978	0.0839	0.0026	1331.35	77.7687	1305.42	55.8683	1290.24	79.9669	198.8	0.796178	-3.18689
DZ-SH2-09	1.845	0.057	0.138	0.0049	0.68279	0.0975	0.0026	833.343	59.1794	1061.65	65.5977	1576.84	84.0984	1162	0.485437	47.1512
DZ-SH2-10	3.88	0.15	0.2632	0.0075	0.88246	0.1061	0.0018	1506.19	85.8393	1609.53	124.448	1733.46	58.8166	430	0.680272	13.1104
DZ-SH2-11	4.03	0.12	0.2604	0.0079	0.58306	0.112	0.0029	1491.89	90.5216	1640.27	97.6836	1832.12	94.8777	520	1.11607	18.5704
DZ-SH2-12	4.63	0.11	0.317	0.0073	0.70133	0.106	0.0021	1775.06	81.7536	1754.69	83.3763	1731.73	68.6155	466	0.877193	-2.50249
DZ-SH2-13	2.592	0.087	0.2268	0.0068	0.66562	0.0862	0.0024	1317.71	79.0159	1298.38	87.1597	1342.67	74.7659	426	0.877193	1.85938
DZ-SH2-14	4.35	0.12	0.2997	0.0078	0.24516	0.1065	0.0023	1689.82	87.9586	1702.9	93.9529	1740.36	75.1703	325	0.576369	2.90367
DZ-SH2-15	4.373	0.097	0.3007	0.0072	0.61184	0.1045	0.0019	1694.78	81.16	1707.25	75.739	1705.53	62.0194	406	0.573394	0.630517
DZ-SH2-16	4.101	0.082	0.2903	0.0065	0.54266	0.1015	0.0023	1643.03	73.5769	1654.5	66.164	1651.73	74.8567	156	1.32626	0.526727
DZ-SH2-17	4.09	0.096	0.2941	0.0076	0.78297	0.1015	0.0019	1661.99	85.8966	1652.31	77.5657	1651.73	61.8381	245	1.54321	-0.620987
DZ-SH2-18	4.297	0.068	0.3022	0.0052	0.44898	0.1035	0.0019	1702.21	58.5803	1692.79	53.5767	1687.81	61.968	208	0.823045	-0.852983
DZ-SH2-19	4.103	0.087	0.2949	0.0054	0.66215	0.101	0.0018	1665.97	61.0121	1654.9	70.181	1642.57	58.547	122	2.43902	-1.42456
DZ-SH2-20	0.791	0.031	0.0614	0.0021	0.75659	0.0931	0.0018	384.134	26.2763	591.739	46.3816	1489.92	57.6125	1660	0.581395	74.2179
DZ-SH2-21	3.38	0.28	0.159	0.013	0.9224	0.1504	0.0041	951.217	155.545	1499.77	248.483	2350.48	128.151	1379	0.8	59.5309
DZ-SH2-22	3.8	0.11	0.2732	0.0071	0.58322	0.1017	0.0023	1557.02	80.9288	1592.75	92.2116	1655.38	74.8744	312	0.904159	5.94135
DZ-SH2-23	3.22	0.075	0.2417	0.0045	0.67785	0.098	0.0017	1395.53	51.9643	1461.98	68.1049	1586.41	55.0388	524	0.890472	12.0324
DZ-SH2-24	2.647	0.069	0.2227	0.0053	0.57685	0.0853	0.0022	1296.13	61.6926	1313.81	68.4948	1322.37	68.2112	216	0.75643	1.98443
DZ-SH2-25	2.75	0.19	0.202	0.013	0.80558	0.0985	0.0025	1186.06	152.661	1342.09	185.452	1595.92	81.0111	865	1.13636	25.682
DZ-SH2-26	3.09	0.19	0.215	0.013	0.90042	0.1026	0.0028	1255.4	151.816	1430.21	175.884	1671.68	91.2419	617	1.45349	24.9019
DZ-SH2-27	4.18	0.076	0.2954	0.0064	0.71202	0.1023	0.0016	1668.46	72.2961	1670.11	60.7312	1666.27	52.1217	443	0.615385	-0.131521
DZ-SH2-28	3.563	0.081	0.2476	0.0076	0.87274	0.1046	0.0018	1426.09	87.5465	1541.33	70.0802	1707.29	58.7596	527	0.487805	16.4709
DZ-SH2-29	4.647	0.081	0.3125	0.0058	0.56909	0.1074	0.0018	1753	65.0713	1757.75	61.2774	1755.76	58.8524	244	0.346021	0.157562
DZ-SH2-30	5.04	0.19	0.326	0.011	0.84658	0.1121	0.003	1818.96	122.752	1826.07	137.68	1833.74	98.1483	376	0.217865	0.805647
DZ-SH2-31	4.43	0.11	0.3006	0.009	0.70063	0.1085	0.0022	1694.28	101.454	1717.97	85.3166	1774.38	71.9565	253	0.381679	4.51422
DZ-SH2-32	4.414	0.09	0.3019	0.0063	0.55314	0.1075	0.0021	1700.72	70.9808	1714.97	69.9353	1757.47	68.6638	195	0.962464	3.22866
DZ-SH2-33	2.719	0.057	0.2292	0.005	0.49111	0.0851	0.0021	1330.3	58.0412	1333.66	55.9166	1317.82	65.0392	140.6	1.12486	-0.947525
DZ-SH2-34	4.82	0.098	0.3168	0.006	0.61692	0.1104	0.0017	1774.08	67.2001	1788.39	72.7231	1806	55.6197	203	0.269542	1.76754
DZ-SH2-35	3.77	0.18	0.255	0.013	0.85594	0.1087	0.0028	1464.21	149.292	1586.38	151.485	1777.74	91.5857	391	0.357143	17.6366
DZ-SH2-36	4.278	0.073	0.3013	0.0057	0.66409	0.1035	0.0016	1697.75	64.2362	1689.14	57.6471	1687.81	52.1836	392	0.444444	-0.588919
DZ-SH2-37	0.696	0.052	0.0576	0.0034	0.94446	0.0881	0.0025	361.013	42.6196	536.399	80.1516	1384.67	78.5849	2790	0.694444	73.9278
DZ-SH2-38	3.753	0.068	0.2649	0.0065	0.61902	0.1043	0.002	1514.86	74.3421	1582.75	57.3554	1702.01	65.2735	565	0.185874	10.9954
DZ-SH2-39	0.982	0.033	0.0806	0.0029	0.85937	0.089	0.0015	499.703	35.9588	694.63	46.6859	1404.16	47.3312	2210	0.204499	64.4127
DZ-SH2-40	1.065	0.041	0.0795	0.003	0.85674	0.0985	0.0022	493.138	37.2179	736.285	56.6905	1595.92	71.2898	1107	0.99108	69.1001
DZ-SH2-41	2.696	0.06	0.2298	0.0044	0.59734	0.0842	0.0015	1333.45	51.0634	1327.36	59.0813	1297.18	46.2177	144.7	1.08108	-2.79629
DZ-SH2-42	1.11	0.06	0.0884	0.0053	0.86974	0.0912	0.0024	546.068	65.4787	758.174	81.9648	1450.78	76.357	1450	0.458716	62.3605
DZ-SH2-43	5.223	0.094	0.3359	0.0064	0.50893	0.1138	0.0022	1866.92	71.1418	1856.38	66.8196	1860.96	71.9529	467	0.921659	-0.319832
DZ-SH2-44	4.39	0.086	0.3048	0.0055	0.71195	0.1043	0.0016	1715.07	61.8955	1710.46	67.0157	1702.01	52.2188	311	0.801925	-0.767433
DZ-SH2-45	4.256	0.08	0.2852	0.005	0.56991	0.1081	0.0018	1617.5	56.7145	1684.9	63.342	1767.64	58.8668	379	0.786164	8.49389
DZ-SH2-46	2.533	0.09	0.1769	0.0046	0.84043	0.1051	0.0021	1050.02	54.608	1281.56	91.0704	1716.06	68.5773	775	0.369004	38.8125
DZ-SH2-47	3.61	0.18	0.245	0.0095	0.85826	0.1078	0.0032	1412.64	109.552	1551.74	154.744	1762.56	104.642	510	0.374532	19.8531
DZ-SH2-48	3.518	0.086	0.2424	0.0054	0.69812	0.1044	0.0022	1399.16	62.3389	1531.27	74.8659	1703.77	71.8064	307	1.09769	17.8785
DZ-SH2-49	2.19	0.12	0.157	0.0076	0.88682	0.1019	0.0025	940.083	91.0145	1177.87	129.081	1659.01	81.4041	364	0.377358	43.3348
DZ-SH2-50	0.827	0.041	0.0653	0.003	0.9279	0.0916	0.0017	407.777	37.468	611.946	60.6767	1459.11	54.159	1394	1.05152	72.053
DZ-SH2-51	4.288	0.075	0.2983	0.0046	0.44286	0.1047	0.0018	1682.87	51.9022	1691.06	59.1555	1709.05	58.764	276	0.0277778	1.53175
DZ-SH2-52	4.317	0.092	0.3041	0.006	0.68163	0.1033	0.0016	1711.61	67.5412	1696.61	72.3134	1684.24	52.174	423	0.354233	-1.62477
DZ-SH2-53	3.642	0.094	0.2643	0.0065	0.68457	0.1	0.0021	1511.8	74.3604	1558.76	80.4632	1624.08	68.2115	229	1.27714	6.91338
DZ-SH2-54	4.06	0.11	0.2872	0.0071	0.55513	0.1029	0.0021	1627.52	80.4694	1646.31	89.2088	1677.08	68.4522	297.5	1.03306	2.95492
DZ-SH2-55	4.13	0.11	0.2925	0.0079	0.74778	0.1039	0.0019	1654.01	89.3448	1660.26	88.4399	1694.93	61.9896	453	0.735294	2.41399
DZ-SH2-56	4.407	0.078	0.3116	0.0064	0.46849	0.1029	0.0021	1748.58	71.8285	1713.66	60.6604	1677.08	68.4522	223	0.821693	-4.26321
DZ-SH2-57	4.18	0.17	0.292	0.011	0.36994	0.1009	0.0042	1651.52	124.429	1670.11	135.846	1640.73	136.592	42.6	1.35318	-0.657301
DZ-SH2-58	0.893	0.082	0.071	0.0056	0.96933	0.0912	0.0024	442.178	69.752	647.98	119.002	1450.78	76.357	1520	0.529101	69.5214
DZ-SH2-59	2.4	0.18	0.174	0.013	0.91721	0.1029	0.003	1034.11	154.523	1242.6	186.39	1677.08	97.7888	247	0.537634	38.3384
DZ-SH2-60	1.955	0.078	0.1358	0.0044	0.74736	0.1044	0.0034	820.869	53.1933	1100.17	87.7882	1703.77	110.974	1006	0.42735	51.8205
DZ-SH2-61	2.763	0.077	0.2329	0.0055	0.51199	0.0853	0.0021	1349.68	63.7462	1345.6	74.9992	1322.37	65.1107	175.2	1.20919	-2.06544
DZ-SH2-62	3.48	0.16	0.245	0.011	0.77886	0.1032	0.0023	1412.64	126.849	1522.69	140.018	1682.45	74.9931	612	1.08696	16.0371
DZ-SH2-63	3.94	0.11	0.2711	0.0065	0.68626	0.1045	0.0022	1546.38	74.1534	1621.94	90.565	1705.53	71.8119	625	0.66313	9.33137
DZ-SH2-64	4.179	0.092	0.2851	0.0075	0.61076	0.1056	0.0023	1617	85.0752	1669.91	73.5256	1724.79	75.1327	729	0.500751	6.24943
DZ-SH2-65	3.82	0.25	0.26	0.015	0.94021	0.1077	0.0021	1489.84	171.905	1596.97	209.027	1760.86	68.6688	291	0.364964	15.3915
DZ-SH2-66	4.23	0.11	0.2954	0.0054	0.50748	0.1059	0.0025	1668.46	60.9998	1679.86	87.3687	1729.99	81.6805	535	1.0582	3.55698
DZ-SH2-67	3.1	0.1	0.2143	0.0083	0.56893	0.1053	0.003	1251.69	96.9575	1432.69	92.4318	1719.56	97.9806	455	1.08932	27.2089
DZ-SH2-68	2.072	0.064	0.1479	0.0047	0.55174	0.1035	0.0027	889.181	56.5132	1139.59	70.3996	1687.81	88.0598	999	0.502513	47.3175
DZ-SH2-69	2.92	0.12	0.242	0.015	0.85164	0.0878	0.0038	1397.09	173.192	1387.11	114.009	1378.11	119.29	140.1	0.826446	-1.37684
DZ-SH2-70	2.81	0.082	0.1998	0.0057	0.76815	0.1018	0.002	1174.25	66.999	1358.21	79.269	1657.2	65.1158	791	0.699301	29.1426
DZ-SH2-71	4.63	0.11	0.319	0.0064	0.60938	0.1049	0.0021	1784.84	71.6176	1754.69	83.3763	1712.56	68.5678	400	0.723066	-4.22065
DZ-SH2-72	6.39	0.21	0.382	0.015	0.77043	0.1217	0.0032	2085.62	163.792	2030.9	133.486	1981.3	104.193	254	0.75188	-5.26532
DZ-SH2-73	3.66	0.11	0.2582	0.0069	0.52561	0.1043	0.0029	1480.63	79.1349	1562.69	93.9322	1702.01	94.6465	561	0.45045	13.007
DZ-SH2-74	4.3	0.14	0.2927	0.009	0.77725	0.106	0.0021	1655.01	101.777	1693.36	110.265	1731.73	68.6155	452	0.615006	4.43013
DZ-SH2-75	0.935	0.095	0.0713	0.0053	0.97511	0.0934	0.0024	443.983	66.0059	670.262	136.203	1496.01	76.8828	1920	0.416667	70.3222
DZ-SH2-76	3.55	0.15	0.255	0.011	0.8629	0.1005	0.0019	1464.21	126.324	1538.43	130.009	1633.35	61.7587	352	2.6738	10.3557
DZ-SH2-77	3.57	0.12	0.2472	0.0082	0.68194	0.1049	0.0028	1424.02	94.4738	1542.89	103.724	1712.56	91.4237	524	0.793651	16.8486
DZ-SH2-78	4.17	0.11	0.2932	0.0061	0.57804	0.1038	0.0024	1657.5	68.9683	1668.15	88.0077	1693.15	78.296	494	0.623441	2.10553
DZ-SH2-79	6.1	0.13	0.3607	0.0074	0.75927	0.1231	0.0023	1985.49	81.4673	1990.25	84.8302	2001.64	74.7971	213.4	0.456621	0.806609
DZ-SH2-80	2.29	0.21	0.156	0.013	0.93363	0.1061	0.0037	934.509	155.752	1209.21	221.776	1733.46	120.901	1083	0.429185	46.0898
DZ-SH2-81	4.24	0.13	0.301	0.01	0.70818	0.1019	0.0028	1696.27	112.709	1681.8	103.129	1659.01	91.1726	266	1.40647	-2.24534
DZ-SH2-82	3.24	0.1	0.2295	0.0047	0.67689	0.1029	0.002	1331.88	54.5519	1466.79	90.5423	1677.08	65.1925	313.1	0.757002	20.5834
DZ-SH2-83	2.574	0.055	0.2187	0.0041	0.42769	0.0852	0.0017	1275	47.8053	1293.28	55.2683	1320.09	52.6798	131.5	1.14416	3.41584
Standards run with DZ-SH1 and DZ-SH2: WRS-1348, Plešovice, Temora 2
WRS-1348	0.659	0.032	0.0848	0.0031	0.51736	0.0571	0.0027	524.71	19.1816	514.002	24.9591	495.398	23.4251	84.3	0.79	-5.91696
WRS-1348	0.613	0.032	0.0822	0.0029	0.50317	0.0553	0.0026	509.241	17.9659	485.45	25.3416	424.372	19.9524	84.3	0.784	-19.9986
WRS-1348	0.673	0.029	0.084	0.0025	0.060425	0.057	0.0028	519.954	15.4748	522.535	22.5164	491.533	24.1455	77.1	0.797	-5.78212
WRS-1348	0.682	0.033	0.0837	0.0031	0.61161	0.0576	0.0024	518.17	19.1915	527.982	25.5475	514.58	21.4408	77.8	0.825	-0.697636
WRS-1348	0.653	0.031	0.0835	0.0029	0.30419	0.0561	0.0029	516.98	17.955	510.323	24.2267	456.328	23.5892	93.1	0.713	-13.2913
WRS-1348	0.644	0.031	0.0846	0.0038	0.6493	0.0562	0.0027	523.521	23.5151	504.78	24.2984	460.278	22.113	88.6	0.759	-13.7402
WRS-1348	0.635	0.033	0.0806	0.0028	0.53279	0.0572	0.0024	499.703	17.3594	499.206	25.943	499.252	20.9477	86.5	0.696	-0.090257
WRS-1348	0.668	0.038	0.0854	0.0032	0.48723	0.0578	0.0033	528.275	19.7948	519.496	29.5521	522.189	29.8136	76.6	0.849	-1.16538
WRS-1348	0.684	0.036	0.0823	0.0036	0.51769	0.0596	0.0025	509.837	22.3015	529.189	27.8521	589.083	24.7099	75.6	0.829	13.4526
WRS-1348	0.679	0.036	0.0856	0.003	0.53203	0.058	0.0028	529.462	18.5559	526.17	27.8971	529.762	25.5747	88.1	0.655	0.056566
WRS-1348	0.658	0.031	0.0827	0.0031	0.56892	0.0568	0.0026	512.219	19.2005	513.39	24.1871	483.777	22.1447	83.5	0.81	-5.87919
WRS-1348	0.668	0.032	0.0837	0.0029	0.44569	0.0581	0.0027	518.17	17.9533	519.496	24.886	533.535	24.7942	72.6	0.799	2.87984
WRS-1348	0.71	0.039	0.0838	0.0029	0.22708	0.0599	0.0036	518.765	17.9525	544.746	29.9227	599.964	36.0579	68.7	0.787	13.534
WRS-1348	0.669	0.037	0.0839	0.003	0.60341	0.0577	0.0025	519.36	18.5707	520.104	28.7651	518.389	22.4605	85.7	0.704	-0.187209
Plešovice	0.4	0.015	0.0552	0.0023	0.62809	0.0528	0.0015	346.368	14.432	341.648	12.8118	320.212	9.09693	965	6.25	-8.16832
Plešovice	0.394	0.014	0.0539	0.0017	0.6135	0.053	0.0017	338.421	10.6738	337.287	11.9848	328.797	10.5463	974	6.64	-2.92712
Plešovice	0.399	0.014	0.0542	0.0018	0.60651	0.0529	0.0016	340.256	11.3	340.923	11.9622	324.51	9.81505	968	6.83	-4.85216
Plešovice	0.383	0.01	0.0538	0.0017	0.65159	0.0516	0.0014	337.809	10.6743	329.243	8.59643	267.725	7.26384	961	6.55	-26.178
Plešovice	0.397	0.017	0.0551	0.0025	0.71446	0.0511	0.0018	345.757	15.6877	339.47	14.5365	245.343	8.64223	931	7.12	-40.9278
Plešovice	0.383	0.014	0.0533	0.0017	0.56221	0.0526	0.0016	334.75	10.6768	329.243	12.035	311.581	9.47776	959	6.93	-7.43583
Plešovice	0.387	0.015	0.0533	0.0018	0.62753	0.0521	0.0015	334.75	11.3049	332.176	12.875	289.801	8.34361	963	6.68	-15.5102
Plešovice	0.404	0.015	0.0553	0.0014	0.63556	0.0521	0.0012	346.979	8.78427	344.545	12.7925	289.801	6.67489	951	6.25	-19.7299
Plešovice	0.401	0.014	0.0547	0.0018	0.60373	0.0528	0.0014	343.313	11.2973	342.373	11.9532	320.212	8.49047	914	7.11	-7.21417
Plešovice	0.408	0.016	0.0552	0.002	0.69065	0.0525	0.0016	346.368	12.5496	347.434	13.6249	307.249	9.36377	927	6.75	-12.7321
Plešovice	0.42	0.012	0.0533	0.0013	0.47854	0.0581	0.0017	334.75	8.16463	356.051	10.1729	533.535	15.6112	793	5.79	37.2581
Plešovice	0.3948	0.0091	0.0545	0.0015	0.58536	0.0536	0.0012	342.09	9.41532	337.87	7.78778	354.281	7.93166	916	6.73	3.44102
Plešovice	0.393	0.011	0.0537	0.0017	0.49165	0.052	0.0015	337.198	10.6748	336.559	9.42021	285.41	8.23298	901	6.67	-18.145
Plešovice	0.391	0.011	0.0546	0.0014	0.53628	0.0514	0.0013	342.701	8.78721	335.1	9.42736	258.809	6.54575	911	6.43	-32.4148
Plešovice	0.379	0.011	0.0516	0.0014	0.62474	0.0528	0.0013	324.337	8.79985	326.302	9.47051	320.212	7.88401	918	6.78	-1.28829
Plešovice	0.402	0.013	0.0531	0.0016	0.60044	0.055	0.0016	333.526	10.0497	343.098	11.0952	412.223	11.9919	911	6.66	19.0909
Temora 2	0.495	0.019	0.0677	0.0014	0.29842	0.0521	0.0017	422.284	8.73261	408.312	15.6726	289.801	9.45609	181	1.372	-45.715
Temora 2	0.5	0.017	0.0667	0.0012	0.21921	0.0547	0.002	416.243	7.48864	411.702	13.9979	399.981	14.6245	181	1.328	-4.06575
Temora 2	0.502	0.021	0.0653	0.0012	0.4327	0.0557	0.0021	407.777	7.49361	413.055	17.2792	440.43	16.6051	204	2.476	7.41381
Temora 2	0.511	0.019	0.0662	0.0016	0.31268	0.055	0.0019	413.221	9.98722	419.121	15.5838	412.223	14.2404	230	1.76	-0.242104
Temora 2	0.505	0.024	0.0654	0.0012	0.10528	0.0559	0.0028	408.382	7.49325	415.081	19.7266	448.399	22.46	236	2.523	8.92429
Temora 2	0.506	0.018	0.065	0.0014	0.38454	0.0559	0.0017	405.962	8.74379	415.756	14.7897	448.399	13.6365	297	1.453	9.46416
Temora 2	0.504	0.016	0.0679	0.0016	0.31399	0.0538	0.0017	423.491	9.97918	414.406	13.1558	362.687	11.4604	181	2.41	-16.765
Temora 2	0.517	0.015	0.0655	0.0012	0.44049	0.0564	0.0015	408.987	7.4929	423.145	12.2769	468.149	12.4508	284	1.329	12.6374
Temora 2	0.488	0.019	0.0664	0.0014	0.32141	0.0537	0.0018	414.43	8.73799	403.547	15.7119	358.489	12.0164	178	1.271	-15.6046
Temora 2	0.507	0.016	0.0674	0.0017	0.38547	0.0544	0.0016	420.472	10.6054	416.43	13.1418	387.646	11.4013	243	1.105	-8.46827
Temora 2	0.517	0.014	0.0659	0.0013	0.49879	0.0572	0.0013	411.407	8.11577	423.145	11.4585	499.252	11.3466	414	2.214	17.5954
Temora 2	0.514	0.013	0.06661	0.00099	0.20319	0.0562	0.0016	415.7	6.17839	421.135	10.6513	460.278	13.104	326	2.09	9.68519
Temora 2	0.51	0.02	0.0655	0.0014	0.22107	0.0556	0.0024	408.987	8.74172	418.449	16.4098	436.431	18.8387	135.9	1.498	6.28809
Temora 2	0.514	0.023	0.0646	0.0014	0.16692	0.0572	0.0027	403.54	8.74545	421.135	18.8446	499.252	23.5661	93.6	2.146	19.1712
Temora 2	0.526	0.027	0.0657	0.0024	0.37513	0.0571	0.0026	410.197	14.9844	429.152	22.0287	495.398	22.5575	65.2	2.122	17.1983
Temora 2	0.484	0.021	0.0676	0.0013	0.21794	0.0531	0.0026	421.68	8.10923	400.813	17.3907	333.072	16.3086	67.7	2.14	-26.6032
Temora 2	0.502	0.019	0.0654	0.0014	0.11962	0.0556	0.0024	408.382	8.74213	413.055	15.6336	436.431	18.8387	92.2	1.947	6.42673
LA-ICPMS from Arizona LaserChron facility: DZ-SH3 (Unit P6, Horse Thief Spring Formation, Silurian Hills)
DZ-SH3-1	2.31801	0.139889	0.210719	0.00710213	0.558493	0.079783	0.00399392	1232.65	75.6308	1217.81	85.6688	1191.63	197.692	23.2333	0.0110654	-3.44188
DZ-SH3-2	4.37553	0.0668223	0.305982	0.00426968	0.913712	0.103713	0.000643634	1720.9	42.151	1707.73	25.2454	1691.59	22.8909	141.369	0.633669	-1.73275
DZ-SH3-3	2.31088	0.108066	0.205845	0.00382751	0.397617	0.0814212	0.00349366	1206.64	40.9236	1215.63	66.3071	1231.65	168.48	33.9668	1.64793	2.03048
DZ-SH3-4	3.08431	0.109931	0.247563	0.00872728	0.989082	0.0903592	0.000474596	1425.89	90.1928	1428.8	54.6721	1433.11	20.0414	125.423	0.683588	0.503811
DZ-SH3-5	2.75466	0.0807834	0.232068	0.00418628	0.615121	0.08609	0.00199054	1345.33	43.807	1343.35	43.6997	1340.19	89.3732	34.0263	1.20351	-0.383577
DZ-SH3-6	4.82192	0.123861	0.316983	0.00347749	0.427086	0.110327	0.00256252	1774.98	34.0435	1788.73	43.2109	1804.79	84.4762	43.1341	2.41559	1.6518
DZ-SH3-7	4.54133	0.194295	0.309888	0.0130055	0.980944	0.106286	0.000883504	1740.16	128.013	1738.57	71.2335	1736.66	30.4846	142.871	0.416243	-0.201447
DZ-SH3-8	4.52813	0.10724	0.306147	0.00468412	0.646038	0.107272	0.00193922	1721.72	46.2366	1736.15	39.3999	1753.57	66.1611	39.6302	1.75473	1.81666
DZ-SH3-9	3.0066	0.0548083	0.24381	0.0033225	0.747555	0.0894382	0.00108291	1406.48	34.4398	1409.3	27.7816	1413.54	46.3243	51.2249	0.905908	0.500027
DZ-SH3-10	3.21162	0.0407353	0.254479	0.00300706	0.93163	0.0915315	0.000421902	1461.53	30.9049	1459.97	19.6424	1457.67	17.5298	165.918	0.599597	-0.265243
DZ-SH3-11	4.45927	0.0852237	0.310327	0.00394587	0.665314	0.104218	0.00148698	1742.32	38.8251	1723.43	31.7045	1700.54	52.5679	229.534	0.458533	-2.45654
DZ-SH3-12	4.55726	0.0351512	0.309737	0.00203617	0.852284	0.106711	0.000430539	1739.41	20.0437	1741.49	12.8453	1743.96	14.7808	159.41	0.666737	0.260827
DZ-SH3-13	5.54347	0.0807506	0.344616	0.00417394	0.831469	0.116666	0.000944165	1908.84	40.0219	1907.36	25.0622	1905.74	29.0763	68.2714	0.839103	-0.162425
DZ-SH3-14	3.22724	0.0412436	0.255561	0.0024481	0.749564	0.0915871	0.000774772	1467.09	25.1385	1463.72	19.8141	1458.82	32.1672	103	0.62456	-0.566866
DZ-SH3-15	4.52097	0.0638453	0.308351	0.00356094	0.817752	0.106337	0.000864333	1732.59	35.0905	1734.84	23.4851	1737.53	29.8055	71.2149	1.06337	0.28461
DZ-SH3-16	3.31098	0.171091	0.264327	0.0134998	0.98836	0.0908477	0.000714174	1511.94	137.668	1483.64	80.6381	1443.39	29.9547	152.626	0.491958	-4.749
DZ-SH3-17	2.55808	0.123756	0.216197	0.00984093	0.940883	0.0858151	0.00140628	1261.75	104.325	1288.75	70.6618	1334	63.3929	92.0148	0.78078	5.41654
DZ-SH3-18	4.58054	0.19929	0.305199	0.0121399	0.914248	0.108851	0.00191877	1717.04	119.922	1745.73	72.5527	1780.26	64.304	62.3859	2.32658	3.55142
DZ-SH3-19	4.3169	0.0979982	0.295554	0.00659542	0.983014	0.105934	0.000441357	1669.23	65.6355	1696.59	37.4342	1730.56	15.2926	184.748	0.382278	3.54425
DZ-SH3-20	4.82812	0.056335	0.320014	0.00261205	0.69954	0.109423	0.000912362	1789.8	25.5124	1789.81	19.6301	1789.81	30.3768	70.1748	0.884976	0.000722487
DZ-SH3-21	3.36096	0.275647	0.265776	0.0213825	0.980968	0.0917164	0.00146057	1519.32	217.817	1495.35	128.532	1461.5	60.5356	56.2629	0.678177	-3.95631
DZ-SH3-22	2.53645	0.0514461	0.208488	0.00325106	0.768809	0.0882358	0.00114445	1220.76	34.6842	1282.55	29.5444	1387.6	49.8026	87.92	1.51059	12.0241
DZ-SH3-23	2.34227	0.0873481	0.208599	0.00289924	0.372697	0.0814374	0.00281817	1221.35	30.928	1225.21	53.0849	1232.04	135.851	39.5897	1.32075	0.867663
DZ-SH3-24	2.35059	0.175499	0.209035	0.0155772	0.998095	0.0815562	0.000375709	1223.68	166.12	1227.74	106.466	1234.9	18.0726	244.78	1.04369	0.908656
DZ-SH3-25	4.61768	0.0884849	0.311362	0.00570955	0.956955	0.107562	0.000598211	1747.4	56.1346	1752.47	31.9895	1758.5	20.3428	115.361	0.441044	0.63081
DZ-SH3-26	3.32828	0.0371308	0.248284	0.0021681	0.782737	0.0972233	0.000675027	1429.62	22.3931	1487.71	17.4217	1571.51	26.0058	303.726	0.287985	9.02889
DZ-SH3-27	2.74412	0.0888031	0.217969	0.00691581	0.980442	0.0913073	0.000581526	1271.14	73.2082	1340.49	48.1748	1453	24.2367	165.037	0.994366	12.5165
DZ-SH3-28	3.08332	0.0438257	0.246081	0.00237302	0.678441	0.0908738	0.000948926	1418.23	24.5529	1428.55	21.7968	1443.94	39.7871	63.8453	0.570613	1.78024
DZ-SH3-29	3.209	0.136726	0.255787	0.0107833	0.989446	0.0909892	0.000561748	1468.25	110.712	1459.33	65.991	1446.36	23.5153	133.424	0.690728	-1.51376
DZ-SH3-31	2.32775	0.125363	0.210848	0.00505003	0.444725	0.0800692	0.0038623	1233.33	53.7719	1220.79	76.5393	1198.71	190.328	34.0612	1.72527	-2.88856
DZ-SH3-32	4.00427	0.0430766	0.288575	0.00269914	0.86946	0.100638	0.000534824	1634.4	27.0063	1635.06	17.4812	1635.89	19.7421	113.887	1.33087	0.0911069
DZ-SH3-33	2.8331	0.178818	0.236248	0.0148578	0.996411	0.0869748	0.000464695	1367.16	154.96	1364.34	94.8061	1359.92	20.5937	112.204	1.10529	-0.532407
DZ-SH3-34	3.09151	0.0594271	0.245877	0.00449799	0.951672	0.091191	0.000538357	1417.18	46.5472	1430.59	29.4979	1450.58	22.4735	250.837	0.762068	2.30242
DZ-SH3-35	9.53946	0.182727	0.399969	0.00763869	0.997043	0.17298	0.000254632	2168.9	70.3482	2391.36	35.2118	2586.68	4.9143	331.746	0.956487	16.1513
DZ-SH3-36	3.17629	0.0620387	0.252766	0.00436619	0.884385	0.0911381	0.000830871	1452.73	44.9348	1451.41	30.1692	1449.47	34.7101	64.1561	0.999994	-0.224458
DZ-SH3-37	2.42244	0.0259178	0.213594	0.00215528	0.943124	0.0822549	0.000292566	1247.94	22.8971	1249.28	15.3791	1251.58	13.9557	173.817	0.649997	0.291255
DZ-SH3-38	4.74365	0.0326624	0.316163	0.00150895	0.693152	0.108818	0.000540065	1770.96	14.7813	1774.99	11.5485	1779.71	18.1021	163.219	0.658927	0.491473
DZ-SH3-39	3.26497	0.0403299	0.25826	0.00266416	0.835132	0.0916897	0.000622974	1480.93	27.2985	1472.75	19.2037	1460.95	25.8283	78.0825	1.2799	-1.36801
DZ-SH3-40	2.8874	0.0679901	0.237258	0.00213517	0.382186	0.0882645	0.0019206	1372.42	22.2496	1378.63	35.5214	1388.23	83.5476	36.7755	0.695359	1.13857
DZ-SH3-41	4.79193	0.0814204	0.321591	0.00494654	0.905264	0.10807	0.000780125	1797.49	48.2564	1783.49	28.5495	1767.12	26.3723	79.2626	0.735508	-1.71879
DZ-SH3-42	4.60455	0.10798	0.314445	0.00563758	0.764526	0.106204	0.0016054	1762.54	55.2969	1750.09	39.1305	1735.24	55.4509	63.944	1.36837	-1.5735
DZ-SH3-43	3.05335	0.0356895	0.247403	0.00206291	0.713367	0.08951	0.000733202	1425.07	21.3218	1421.07	17.8812	1415.08	31.3323	147.148	1.37052	-0.705796
DZ-SH3-44	5.35626	0.0658548	0.340079	0.00248719	0.594844	0.11423	0.00112895	1887.05	23.9291	1877.89	21.0407	1867.76	35.6668	49.468	1.70481	-1.03305
DZ-SH3-45	11.1986	0.774693	0.4624	0.0319695	0.999429	0.175649	0.000410405	2450.14	281.895	2539.8	129.141	2612.19	7.78133	265.93	1.37993	6.20351
DZ-SH3-46	4.39976	0.107795	0.299406	0.00700435	0.954857	0.106578	0.000775697	1688.36	69.4985	1712.3	40.5454	1741.68	26.6742	89.8931	0.960102	3.06149
DZ-SH3-47	4.8064	0.16424	0.320149	0.0108783	0.994379	0.108885	0.000393946	1790.46	106.242	1786.02	57.4576	1780.82	13.1935	176.869	0.653479	-0.541246
DZ-SH3-48	2.45216	0.234767	0.211633	0.00522185	0.257724	0.0840361	0.00777372	1237.51	55.5654	1258.06	138.317	1293.37	360.599	19.0024	1.00306	4.31906
DZ-SH3-50	4.59577	0.0528839	0.313575	0.00333977	0.925571	0.106296	0.000463055	1758.27	32.7801	1748.5	19.1927	1736.82	15.9737	154.1	0.812954	-1.2354
DZ-SH3-50	2.33524	0.0826448	0.207576	0.00228756	0.311394	0.0815928	0.00274402	1215.89	24.4234	1223.07	50.3312	1235.78	131.914	35.9608	0.87192	1.60914
DZ-SH3-51	2.45054	0.0400294	0.214641	0.00305167	0.87038	0.0828035	0.000665987	1253.49	32.3921	1257.58	23.5598	1264.58	31.405	106.082	0.00751474	0.876499
DZ-SH3-54	3.14596	0.0582695	0.248588	0.0015969	0.346823	0.0917848	0.00159452	1431.19	16.4894	1444.01	28.5434	1462.92	66.0264	67.6453	0.816198	2.16883
DZ-SH3-55	5.36345	0.076475	0.339301	0.00330932	0.684034	0.114646	0.00119242	1883.31	31.8573	1879.04	24.4066	1874.31	37.506	72.8032	0.94996	-0.480275
DZ-SH3-56	4.76559	0.108463	0.318319	0.00498608	0.688225	0.108581	0.00179289	1781.52	48.7629	1778.86	38.2076	1775.73	60.2683	42.3394	1.95208	-0.326084
DZ-SH3-57	11.7064	0.152869	0.494157	0.00622716	0.965005	0.171813	0.000588356	2588.63	53.7335	2581.21	24.4331	2575.37	11.4449	75.5168	0.57322	-0.5149
DZ-SH3-58	3.87123	0.159364	0.254272	0.0102065	0.975065	0.11042	0.00100876	1460.47	104.916	1607.7	66.4611	1806.32	33.2158	118.587	0.596155	19.1467
DZ-SH3-59	3.73744	0.0803421	0.257358	0.00518156	0.936599	0.105326	0.000793363	1476.31	53.1316	1579.43	34.443	1719.99	27.6849	139.227	1.23591	14.1676
DZ-SH3-60	2.30331	0.0294239	0.207897	0.00159996	0.602441	0.0803532	0.0008193	1217.6	17.0777	1213.31	18.0893	1205.65	40.1316	100.143	0.742038	-0.991228
DZ-SH3-61	4.71373	0.0620838	0.314552	0.00303524	0.732631	0.108685	0.000974299	1763.07	29.769	1769.68	22.0666	1777.48	32.7093	67.4042	1.12478	0.810572
DZ-SH3-63	2.62491	0.038343	0.222216	0.00152305	0.469209	0.0856718	0.00110513	1293.57	16.0662	1307.64	21.4816	1330.77	49.9222	107.398	0.73728	2.79522
DZ-SH3-65	3.70497	0.0262367	0.274258	0.00163638	0.842558	0.0979771	0.000373697	1562.38	16.5567	1572.44	11.3244	1585.96	14.2609	166.156	2.02045	1.48687
DZ-SH3-66	3.23371	0.0861084	0.258779	0.00559911	0.812542	0.0906297	0.00140673	1483.59	57.3483	1465.28	41.309	1438.82	59.1839	49.7452	0.592645	-3.11198
DZ-SH3-67	3.99428	0.0502646	0.273823	0.00311348	0.903549	0.105796	0.000570463	1560.18	31.5127	1633.03	20.4392	1728.17	19.7978	182.698	0.207805	9.72057
DZ-SH3-69	4.28892	0.0512955	0.301755	0.00338981	0.93927	0.103084	0.000423103	1700	33.5734	1691.24	19.6963	1680.37	15.161	124.672	0.622409	-1.16843
DZ-SH3-71	4.88246	0.0754426	0.319118	0.00417486	0.846667	0.110965	0.000912379	1785.42	40.8045	1799.23	26.046	1815.26	29.8617	110.468	1.26808	1.644
DZ-SH3-72	2.35821	0.0450591	0.211834	0.00309566	0.764818	0.0807395	0.00099389	1238.58	32.9351	1230.04	27.2496	1215.13	48.4141	100.121	1.49955	-1.92967
DZ-SH3-73	4.3076	0.0647832	0.302694	0.0041073	0.902245	0.103212	0.00066936	1704.65	40.6503	1694.82	24.7883	1682.65	23.9487	76.371	1.60571	-1.30767
DZ-SH3-75	2.66567	0.11648	0.223091	0.00911317	0.934855	0.0866609	0.00134441	1298.19	96.0654	1318.99	64.551	1352.95	59.8551	108.488	1.18333	4.04766
DZ-SH3-76	4.24031	0.0474581	0.299409	0.00281196	0.839137	0.102715	0.000625287	1688.38	27.9006	1681.86	18.3918	1673.73	22.5023	105.136	0.795883	-0.875226
DZ-SH3-77	2.73115	0.0676288	0.230677	0.00476311	0.833873	0.0858696	0.00117363	1338.05	49.8996	1336.97	36.8127	1335.23	52.8623	66.7231	1.24717	-0.210717
DZ-SH3-78	5.08723	0.104402	0.325515	0.00656872	0.983295	0.113347	0.000423405	1816.61	63.8922	1833.98	34.8329	1853.74	13.501	148.219	0.74935	2.003
DZ-SH3-79	4.15943	0.103042	0.287525	0.00687943	0.965826	0.10492	0.000673681	1629.15	68.8889	1666.07	40.5628	1712.89	23.617	183.92	0.660898	4.88918
DZ-SH3-80	5.06151	0.0514695	0.322995	0.0025532	0.777355	0.113654	0.00072702	1804.34	24.8814	1829.68	17.2441	1858.62	23.1089	119.117	0.572353	2.92066
DZ-SH3-81	2.27127	0.0899061	0.204016	0.00435811	0.539652	0.0807427	0.00269078	1196.86	46.6677	1203.41	55.8268	1215.21	131.105	32.5825	1.88333	1.51012
DZ-SH3-82	2.7305	0.0419939	0.231142	0.00278033	0.78212	0.0856765	0.000821075	1340.48	29.1164	1336.8	22.8611	1330.88	37.0877	40.4995	0.588933	-0.721862
DZ-SH3-83	2.38837	0.0436153	0.211003	0.00335398	0.870432	0.0820942	0.000738021	1234.16	35.7079	1239.12	26.1416	1247.76	35.1648	137.085	0.834906	1.08977
DZ-SH3-85	3.24124	0.051274	0.257582	0.00374564	0.919229	0.0912629	0.000568422	1477.46	38.4007	1467.08	24.5519	1452.08	23.7051	159.583	0.267978	-1.74808
DZ-SH3-86	3.25474	0.090768	0.257433	0.0042642	0.593959	0.091696	0.00205727	1476.7	43.7223	1470.31	43.3297	1461.08	85.2957	58.4514	0.860429	-1.06873
DZ-SH3-87	3.03315	0.130356	0.246521	0.00912626	0.861395	0.0892359	0.00194799	1420.51	94.3951	1416	65.6596	1409.21	83.5751	61.4295	3.45192	-0.801633
DZ-SH3-88	2.98345	0.0652995	0.244699	0.00404589	0.755424	0.0884269	0.00126816	1411.08	41.9083	1403.41	33.2927	1391.76	55.0359	81.4724	0.883573	-1.38837
DZ-SH3-89	3.18777	0.135917	0.253572	0.0077379	0.715706	0.0911768	0.00271504	1456.87	79.5843	1454.2	65.9331	1450.28	113.384	29.4557	0.445971	-0.454625
DZ-SH3-91	4.80503	0.0754322	0.32005	0.00454162	0.903924	0.108887	0.000731089	1789.98	44.3578	1785.78	26.3898	1780.86	24.4873	65.5235	0.92025	-0.511782
DZ-SH3-92	2.42959	0.0356224	0.215423	0.00265189	0.839602	0.0817977	0.000651466	1257.64	28.1304	1251.4	21.0939	1240.69	31.2542	145.794	1.02715	-1.36679
DZ-SH3-93	3.17174	0.0380109	0.252306	0.0021876	0.723487	0.0911736	0.000754294	1450.36	22.522	1450.31	18.5039	1450.21	31.4955	119.51	1.06818	-0.00987101
DZ-SH3-94	10.1458	0.303437	0.43924	0.0130798	0.995672	0.167526	0.000465638	2347.24	117.173	2448.15	55.2999	2533.06	9.32809	250.485	0.600313	7.33589
DZ-SH3-96	2.8549	0.0496878	0.22913	0.00154687	0.387893	0.0903663	0.00144963	1329.94	16.2257	1370.1	26.1771	1433.27	61.2127	61.393	0.787209	7.20914
DZ-SH3-97	3.21899	0.103781	0.255769	0.00295752	0.35866	0.0912789	0.00274705	1468.16	30.3645	1461.74	49.9637	1452.41	114.56	30.8751	1.5016	-1.08437
DZ-SH3-99	2.23618	0.0459822	0.203413	0.00216889	0.518531	0.0797308	0.00140186	1193.63	23.2365	1192.46	28.8567	1190.34	69.4254	43.8834	1.01076	-0.276248
DZ-SH3-100	4.10677	0.151491	0.286795	0.0103647	0.979707	0.103855	0.000767877	1625.49	103.849	1655.65	60.2599	1694.11	27.2603	165.609	1.11954	4.0503
Standard run with DZ-SH3: Sri Lanka Zircon, Braintree Diorite
SL Zircon	0.7456	0.0203378	0.0916168	0.00214657	0.858957	0.0590242	0.000824403	565.092	12.6763	565.668	11.8303	568.007	30.3617	464.152	0.229089	0.513281
SL Zircon	0.747772	0.0194924	0.0918323	0.00157768	0.65906	0.0590572	0.00115782	566.365	9.31494	566.931	11.3244	569.225	42.65	571.221	0.230117	0.502482
SL Zircon	0.740204	0.0171054	0.0912942	0.00160245	0.759553	0.058804	0.000883895	563.187	9.46586	562.524	9.98085	559.836	32.7653	500.057	0.226514	-0.598411
SL Zircon	0.74199	0.0145536	0.0913885	0.00116339	0.649028	0.0588851	0.000878674	563.744	6.87173	563.566	8.48315	562.83	32.5412	546.926	0.229542	-0.162382
SL Zircon	0.744359	0.0172011	0.0915624	0.00124562	0.588702	0.0589609	0.00110138	564.771	7.35623	564.946	10.0127	565.632	40.7047	516.746	0.228775	0.152279
SL Zircon	0.742702	0.0109479	0.0914674	0.000896943	0.665248	0.0588907	0.00064813	564.21	5.29752	563.981	6.37878	563.037	23.9811	573.909	0.230208	-0.208342
SL Zircon	0.743038	0.0193076	0.0915193	0.00171374	0.720637	0.058884	0.00106082	564.516	10.1212	564.177	11.2475	562.79	39.2285	605.505	0.230815	-0.306692
SL Zircon	0.743965	0.0138423	0.0914956	0.00138349	0.812682	0.0589727	0.000639378	564.376	8.17097	564.717	8.05941	566.109	23.5969	611.01	0.232691	0.306122
SL Zircon	0.738382	0.0136752	0.0909552	0.00136423	0.80985	0.0588779	0.000639699	561.184	8.06116	561.461	7.9877	562.564	23.6804	554.078	0.232768	0.245455
SL Zircon	0.74491	0.0107329	0.091706	0.00119271	0.902666	0.0589122	0.000365283	565.619	7.04286	565.267	6.24559	563.832	13.4938	544.901	0.230807	-0.316846
SL Zircon	0.748707	0.0216685	0.0915745	0.00169709	0.640344	0.0592974	0.00131815	564.842	10.0224	567.474	12.5819	578.027	48.2949	351.258	0.203972	2.28095
SL Zircon	0.739774	0.0155649	0.0912947	0.00140692	0.732447	0.0587695	0.00084185	563.19	8.31086	562.274	9.08421	558.569	31.2546	598.116	0.231354	-0.827157
SL Zircon	0.742642	0.0115366	0.0912952	0.00114354	0.806314	0.058997	0.000542094	563.193	6.75504	563.946	6.72206	567.006	20.0461	504.405	0.224701	0.672578
SL Zircon	0.746815	0.0185059	0.0918258	0.00168778	0.741745	0.0589858	0.000980307	566.326	9.96511	566.375	10.7572	566.591	36.1872	475.128	0.225501	0.0468149
SL Zircon	0.739059	0.0184614	0.0911835	0.00138054	0.606107	0.0587843	0.00116795	562.533	8.15586	561.856	10.7791	559.139	43.352	500.865	0.224311	-0.606967
SL Zircon	0.745199	0.0165586	0.0916652	0.00140378	0.689201	0.0589612	0.000949287	565.378	8.28952	565.435	9.63409	565.644	35.019	549.361	0.229616	0.0470662
SL Zircon	0.74194	0.0122851	0.0914056	0.00103298	0.682513	0.0588701	0.000712436	563.845	6.10133	563.537	7.16104	562.275	26.3614	500.296	0.225332	-0.279114
SL Zircon	0.745927	0.0242053	0.0915433	0.00233671	0.786619	0.0590974	0.00118406	564.658	13.8001	565.859	14.0773	570.688	43.5528	462.15	0.229147	1.05654
SL Zircon	0.733585	0.0217981	0.0908251	0.0014454	0.535566	0.0585792	0.00146997	560.415	8.54182	558.655	12.7676	551.505	54.8006	351.301	0.202439	-1.6156
SL Zircon	0.747756	0.0256236	0.0920388	0.00259271	0.822058	0.0589234	0.00114971	567.583	15.305	566.922	14.8866	564.248	42.5005	474.463	0.231754	-0.591207
SL Zircon	0.743216	0.0140029	0.0914741	0.00130626	0.757934	0.0589272	0.000724245	564.249	7.715	564.281	8.15638	564.386	26.7943	548.607	0.230859	0.0241897
SL Zircon	0.746422	0.0144317	0.091791	0.00121283	0.683386	0.058977	0.000832477	566.121	7.16106	566.146	8.39074	566.269	30.7385	555.341	0.228148	0.0261647
SL Zircon	0.736392	0.0183781	0.0906733	0.00137832	0.609085	0.0589018	0.00116587	559.518	8.14654	560.298	10.747	563.446	43.1344	538.043	0.227867	0.697097
SL Zircon	0.733509	0.0143266	0.0908231	0.000879238	0.495647	0.0585743	0.000993635	560.403	5.19602	558.61	8.39169	551.322	37.0321	506.642	0.231989	-1.64716
SL Zircon	0.746849	0.0143312	0.0916084	0.0010771	0.61273	0.0591284	0.000896675	565.042	6.36073	566.394	8.3303	571.826	33.0001	577.937	0.227696	1.18638
SL Zircon	0.737361	0.0190885	0.0910353	0.00196689	0.834603	0.0587447	0.000837714	561.657	11.6215	560.864	11.1562	557.649	31.1018	510.097	0.225187	-0.718721
SL Zircon	0.750489	0.024364	0.0926041	0.00228117	0.758792	0.0587778	0.00124286	570.92	13.459	568.508	14.1327	558.853	46.115	486.64	0.229287	-2.15915
SL Zircon	0.754803	0.0226389	0.0925714	0.00185346	0.667552	0.0591365	0.00132062	570.727	10.9358	571.007	13.0997	572.137	48.5498	481.695	0.22909	0.246422
SL Zircon	0.741584	0.0158821	0.0911284	0.00108603	0.556468	0.0590208	0.00105023	562.207	6.41629	563.329	9.25968	567.884	38.7164	561.151	0.227762	0.999538
Braintree	0.511788	0.0620368	0.0678827	0.00171102	0.20794	0.0546802	2.16836	423.387	10.3288	419.651	41.6725	399.148	265.947	116.785	0.973484	-6.07256
Braintree	0.517232	0.0507888	0.0675782	0.00159987	0.241099	0.0555108	1.71672	421.549	9.66059	423.301	33.9928	432.835	212.432	119.745	0.973068	2.60763
Braintree	0.506817	0.0922043	0.0670242	0.00366644	0.300686	0.0548427	3.16376	418.202	22.1508	416.307	62.1521	405.793	388.995	83.4513	0.94111	-3.05804
LA-ICPMS from Arizona LaserChron facility: DZ-BM1 (Basal Conglomerate, Crystal Spring Formation, Black Mountains)
DZ-BM1-2	3.80945	0.268531	0.270496	0.0190375	0.998428	0.102141	0.000403502	1543.32	193.205	1594.74	113.504	1663.37	14.6204	276.233	0.470053	7.21756
DZ-BM1-3	4.25306	0.0996954	0.296621	0.00345784	0.497313	0.103992	0.00211484	1674.53	34.3828	1684.33	38.5456	1696.54	74.9666	46.2982	1.23512	1.29724
DZ-BM1-4	4.32512	0.0453327	0.294227	0.00236723	0.767617	0.106614	0.000716183	1662.62	23.5819	1698.16	17.2883	1742.3	24.6171	234.683	1.05158	4.5735
DZ-BM1-5	4.18157	0.0470446	0.293762	0.00320913	0.971005	0.103239	0.000277665	1660.3	31.9803	1670.41	18.4383	1683.13	9.93117	189.632	0.746651	1.35619
DZ-BM1-6	4.56902	0.0628237	0.313012	0.0032	0.743513	0.105867	0.000973434	1755.51	31.4218	1743.64	22.9099	1729.4	33.7517	70.3983	0.292751	-1.50968
DZ-BM1-7	4.55376	0.0423679	0.310589	0.0022333	0.772849	0.106337	0.000627831	1743.6	21.9699	1740.85	15.4924	1737.53	21.6489	131.301	0.613754	-0.349754
DZ-BM1-8	11.2099	0.0635036	0.474957	0.00249122	0.925893	0.171177	0.000366343	2505.26	21.7762	2540.74	10.5621	2569.17	7.15708	157.223	0.837997	2.48748
DZ-BM1-9	4.45992	0.0527441	0.306188	0.00285237	0.787718	0.105642	0.000769645	1721.92	28.1546	1723.55	19.6183	1725.5	26.7582	84.0818	1.21827	0.207702
DZ-BM1-11	4.24071	0.0941845	0.298967	0.0063886	0.96215	0.102876	0.000622665	1686.18	63.4103	1681.94	36.5002	1676.63	22.3678	109.127	0.620291	-0.569569
DZ-BM1-13	4.08392	0.247142	0.288321	0.0174031	0.997425	0.10273	0.000445886	1633.14	174.172	1651.1	98.7987	1674.01	16.0455	218.104	1.91099	2.44179
DZ-BM1-15	4.35408	0.0581976	0.300195	0.00287096	0.715511	0.105194	0.000982268	1692.27	28.4687	1703.67	22.0748	1717.7	34.3264	83.9851	0.379363	1.48013
DZ-BM1-16	4.71408	0.249138	0.319389	0.0159645	0.945785	0.107047	0.0018375	1786.75	156.01	1769.74	88.5992	1749.72	62.8519	82.4836	1.43928	-2.11583
DZ-BM1-17	4.46841	0.0502376	0.303633	0.00220972	0.64731	0.106734	0.000914666	1709.3	21.854	1725.12	18.6569	1744.36	31.3974	84.1654	0.392331	2.00974
DZ-BM1-18	4.58712	0.0719017	0.311209	0.00389534	0.798536	0.106902	0.00100866	1746.65	38.3021	1746.93	26.1357	1747.24	34.5574	75.6746	0.735799	0.0337795
DZ-BM1-19	4.27065	0.0522185	0.295028	0.00354488	0.982673	0.104986	0.000237931	1666.61	35.2916	1687.72	20.1203	1714.05	8.33578	315.326	0.940441	2.76775
DZ-BM1-20	3.92439	0.155901	0.276314	0.010891	0.992172	0.103007	0.000511005	1572.77	110.019	1618.72	64.3132	1678.99	18.3278	203.029	0.45831	6.326
DZ-BM1-21	4.21895	0.108511	0.297357	0.00595742	0.778952	0.102902	0.00165967	1678.19	59.2039	1677.71	42.2293	1677.1	59.5974	43.222	1.08546	-0.0645344
DZ-BM1-22	4.51814	0.122796	0.30779	0.00810835	0.969294	0.106464	0.000711536	1729.82	79.9371	1734.32	45.1983	1739.73	24.4996	119.005	0.58293	0.569496
DZ-BM1-23	4.06267	0.131256	0.281236	0.0090708	0.998311	0.104771	0.000196647	1597.58	91.2792	1646.84	52.6621	1710.27	6.90686	257.702	0.727598	6.58896
DZ-BM1-25	4.50284	0.101239	0.307924	0.00667288	0.963847	0.106058	0.000635376	1730.48	65.7783	1731.5	37.3655	1732.71	21.98	145.245	0.645451	0.128534
DZ-BM1-26	4.60627	0.0679642	0.313814	0.00444144	0.959226	0.106457	0.000443958	1759.45	43.5853	1750.4	24.6199	1739.6	15.2862	140.768	0.663858	-1.14079
DZ-BM1-27	4.52266	0.0293211	0.305109	0.00160876	0.813293	0.107507	0.000405543	1716.6	15.8925	1735.15	10.7819	1757.57	13.7995	174.481	1.0631	2.33119
DZ-BM1-28	4.21347	0.113239	0.29911	0.00571362	0.710762	0.102167	0.00193147	1686.89	56.7044	1676.65	44.1162	1663.83	69.9818	30.1205	2.74785	-1.38589
DZ-BM1-29	4.07702	0.0479457	0.28791	0.0024189	0.71442	0.102703	0.00084511	1631.08	24.2148	1649.72	19.1784	1673.53	30.4186	70.1296	1.11032	2.53648
DZ-BM1-31	4.275	0.145268	0.302673	0.00988605	0.961202	0.102438	0.000960191	1704.55	97.8461	1688.56	55.9393	1668.74	34.6721	84.326	1.29195	-2.14594
DZ-BM1-32	4.07554	0.0652403	0.287299	0.00421869	0.917302	0.102884	0.000655805	1628.02	42.252	1649.42	26.1046	1676.78	23.556	124.589	1.40253	2.90824
DZ-BM1-34	4.30265	0.121466	0.297146	0.00832839	0.992824	0.105018	0.00035454	1677.14	82.7802	1693.87	46.5262	1714.62	12.4164	161.461	0.896942	2.18565
DZ-BM1-35	4.40745	0.0656375	0.305558	0.004246	0.933084	0.104614	0.000560335	1718.81	41.9308	1713.74	24.6514	1707.53	19.7135	106.222	0.406784	-0.660813
DZ-BM1-36	4.70535	0.121552	0.315154	0.0080055	0.98332	0.108285	0.000508789	1766.02	78.4812	1768.19	43.272	1770.75	17.1601	130.461	0.807945	0.267099
DZ-BM1-37	4.31896	0.209915	0.29724	0.0118368	0.819336	0.105383	0.00293649	1677.61	117.645	1696.99	80.1868	1720.99	102.414	155.399	2.76656	2.52107
DZ-BM1-38	4.1684	0.0641887	0.294573	0.00420681	0.927408	0.10263	0.000591149	1664.34	41.8963	1667.83	25.2223	1672.21	21.2952	110.459	1.42231	0.470621
DZ-BM1-39	4.32306	0.0497971	0.297897	0.00334478	0.97474	0.10525	0.000270775	1680.87	33.2258	1697.77	18.9983	1718.68	9.45707	245.896	0.602726	2.19974
DZ-BM1-40	3.7198	0.0305506	0.261527	0.00175915	0.819004	0.103158	0.000486131	1497.65	17.9785	1575.64	13.145	1681.68	17.4042	491.4	0.0573677	10.9434
DZ-BM1-42	4.20511	0.110673	0.293727	0.00733002	0.948194	0.103832	0.000868162	1660.13	73.0492	1675.02	43.1853	1693.7	30.8295	63.5214	1.23413	1.98234
DZ-BM1-44	4.38038	0.0500132	0.302452	0.0030103	0.871726	0.10504	0.000587648	1703.46	29.7986	1708.65	18.8775	1715	20.575	121.638	0.532143	0.672849
DZ-BM1-45	4.23627	0.061772	0.297628	0.00374753	0.863503	0.103231	0.000759178	1679.53	37.2344	1681.08	23.958	1682.99	27.1562	94.7223	1.11482	0.205181
DZ-BM1-47	4.17428	0.098036	0.28504	0.00417327	0.623398	0.106212	0.00195044	1616.7	41.8706	1668.98	38.4812	1735.37	67.3616	139.631	0.513813	6.83876
DZ-BM1-48	3.92539	0.0384426	0.26963	0.00234673	0.888719	0.105588	0.000474065	1538.92	23.8306	1618.93	15.8504	1724.55	16.4921	323.581	0.136616	10.764
DZ-BM1-49	4.19839	0.0328927	0.294552	0.00203097	0.880085	0.103376	0.000384558	1664.24	20.2271	1673.71	12.8498	1685.58	13.7318	129.081	0.366927	1.26622
DZ-BM1-50	3.92281	0.0848461	0.269783	0.00546956	0.937355	0.105459	0.00079463	1539.7	55.5359	1618.4	35.0043	1722.31	27.6861	96.2803	1.27658	10.6026
DZ-BM1-51	4.55003	0.123325	0.309773	0.0083396	0.993265	0.106529	0.000334546	1739.59	82.0925	1740.17	45.1323	1740.85	11.5085	220.046	0.361049	0.0721295
DZ-BM1-52	4.33495	0.0350329	0.300462	0.00228961	0.942929	0.104639	0.000281592	1693.6	22.6993	1700.04	13.3356	1707.96	9.90226	185.089	0.241481	0.840634
DZ-BM1-53	4.50009	0.0455272	0.307902	0.00162363	0.521224	0.106	0.000915207	1730.38	16.0052	1730.99	16.8101	1731.71	31.6835	91.6647	0.495277	0.0771427
DZ-BM1-54	3.81437	0.0607804	0.270141	0.00419237	0.973932	0.102407	0.000370163	1541.52	42.5557	1595.78	25.6393	1668.19	13.3691	329.659	0.636856	7.59317
DZ-BM1-55	4.52358	0.0460499	0.307138	0.00297713	0.95218	0.106819	0.000332246	1726.61	29.3647	1735.32	16.9308	1745.82	11.3913	115.943	0.763802	1.10036
DZ-BM1-56	3.58755	0.0635365	0.256938	0.00437814	0.962135	0.101267	0.000488851	1474.16	44.9082	1546.78	28.1274	1647.45	17.9064	226.895	1.11304	10.5189
DZ-BM1-57	5.29534	0.037835	0.334331	0.00200633	0.839895	0.114872	0.000445466	1859.34	19.386	1868.11	12.2051	1877.87	13.979	138.545	0.296494	0.986528
DZ-BM1-60	4.13848	0.0756415	0.291933	0.00518659	0.97203	0.102815	0.000441344	1651.18	51.7598	1661.94	29.8962	1675.53	15.8658	206.33	0.83213	1.45341
DZ-BM1-62	4.26601	0.106597	0.297683	0.00490902	0.659957	0.103936	0.00195123	1679.81	48.7726	1686.83	41.1135	1695.55	69.2109	42.2655	0.486892	0.928596
DZ-BM1-65	4.2194	0.0323434	0.296115	0.00176051	0.775609	0.103345	0.000500034	1672.02	17.5123	1677.8	12.5843	1685.03	17.8619	167.191	0.892607	0.772143
DZ-BM1-67	3.7885	0.09722	0.267583	0.00674267	0.981941	0.102685	0.000498529	1528.52	68.5816	1590.31	41.2359	1673.2	17.9496	327.912	0.577341	8.64677
DZ-BM1-68	4.38985	0.127311	0.309753	0.00874391	0.973359	0.102786	0.00068349	1739.49	86.0739	1710.43	47.9768	1675.01	24.5761	123.197	1.39427	-3.84952
DZ-BM1-69	3.64864	0.0854082	0.254196	0.00581706	0.97761	0.104102	0.00051278	1460.08	59.7984	1560.21	37.315	1698.49	18.1495	281.599	0.813767	14.0368
DZ-BM1-70	4.28712	0.0611626	0.300287	0.00384167	0.896733	0.103545	0.000653779	1692.73	38.0917	1690.89	23.4934	1688.59	23.2984	109.547	1.05656	-0.245281
DZ-BM1-71	4.0657	0.197682	0.285131	0.0137417	0.991208	0.103416	0.000665299	1617.15	137.867	1647.45	79.2882	1686.3	23.7453	105.786	0.984382	4.1009
DZ-BM1-72	4.22533	0.135002	0.292583	0.00927613	0.992289	0.104739	0.000414794	1654.42	92.5261	1678.95	52.4788	1709.73	14.5708	423.807	0.0788024	3.23467
DZ-BM1-73	4.38932	0.103057	0.301003	0.00649067	0.918412	0.105761	0.000982406	1696.28	64.3225	1710.33	38.8381	1727.57	34.1048	80.5989	0.934001	1.81111
DZ-BM1-74	4.27071	0.125622	0.299481	0.00843418	0.95743	0.103426	0.000878201	1688.73	83.6811	1687.73	48.4105	1686.48	31.3406	90.4914	0.828251	-0.133919
DZ-BM1-75	4.31233	0.084397	0.297218	0.00558703	0.960487	0.105229	0.000573195	1677.5	55.5289	1695.72	32.2655	1718.3	20.0245	179.548	0.672742	2.37469
DZ-BM1-76	4.08868	0.0518856	0.287707	0.00319908	0.876217	0.10307	0.000630329	1630.06	32.03	1652.05	20.707	1680.11	22.5906	107.202	1.19205	2.9789
DZ-BM1-77	4.14683	0.0952835	0.296114	0.00479397	0.704587	0.101568	0.00165608	1672.01	47.6873	1663.58	37.6	1652.95	60.4398	38.9277	1.21781	-1.15331
DZ-BM1-78	4.25665	0.131116	0.294877	0.00237085	0.26102	0.104695	0.00311308	1665.86	23.606	1685.02	50.6637	1708.94	109.452	29.3986	1.18307	2.52117
DZ-BM1-79	4.21149	0.0480907	0.299483	0.0021203	0.620013	0.101991	0.000913759	1688.74	21.0366	1676.26	18.7401	1660.66	33.1739	53.8438	0.980931	-1.69133
DZ-BM1-80	4.01136	0.119582	0.283207	0.00838827	0.99356	0.102727	0.000346992	1607.5	84.2811	1636.5	48.4677	1673.96	12.4871	137.015	1.34001	3.97038
DZ-BM1-82	4.21983	0.0444855	0.296048	0.00246618	0.790205	0.103379	0.000667888	1671.68	24.5331	1677.88	17.3074	1685.63	23.8484	102.151	0.873901	0.827563
DZ-BM1-83	2.94423	0.0655078	0.238337	0.0052158	0.983579	0.0895941	0.000359771	1378.05	54.3042	1393.36	33.7311	1416.87	15.356	343.254	1.20555	2.7404
DZ-BM1-84	4.25475	0.0502004	0.300463	0.00305301	0.861202	0.102703	0.00061589	1693.6	30.2677	1684.66	19.4012	1673.52	22.1672	156.748	0.672036	-1.2001
DZ-BM1-85	4.16323	0.166155	0.289209	0.0114109	0.988609	0.104404	0.000627117	1637.58	114.118	1666.82	65.3735	1703.82	22.1182	139.585	1.09263	3.8882
DZ-BM1-86	4.25458	0.0894706	0.299061	0.0044904	0.714004	0.10318	0.00151916	1686.65	44.5661	1684.62	34.5815	1682.08	54.3697	33.3989	1.47478	-0.271967
DZ-BM1-87	3.76169	0.0589511	0.268733	0.00412323	0.979055	0.101522	0.000323922	1534.37	41.9003	1584.61	25.1428	1652.11	11.8282	240.877	1.67825	7.12693
DZ-BM1-88	3.85513	0.0956071	0.268977	0.00637205	0.955241	0.10395	0.000762631	1535.61	64.7407	1604.34	39.995	1695.79	27.0437	413.646	0.464962	9.44587
DZ-BM1-89	4.4121	0.0700475	0.30194	0.00427717	0.892253	0.10598	0.000759738	1700.92	42.356	1714.61	26.2852	1731.36	26.3067	100.507	0.324796	1.75805
DZ-BM1-90	3.91708	0.0324746	0.27235	0.00212669	0.941883	0.104312	0.000290521	1552.72	21.55	1617.22	13.4123	1702.2	10.2558	437.491	0.123059	8.78162
DZ-BM1-92	4.24606	0.0447568	0.298893	0.00293489	0.931544	0.103031	0.000394912	1685.82	29.1318	1682.97	17.3259	1679.42	14.1599	106.592	0.68979	-0.381152
DZ-BM1-93	3.85585	0.0348689	0.274129	0.00228171	0.920424	0.102015	0.000360637	1561.73	23.0885	1604.49	14.5828	1661.09	13.0868	443.162	0.281705	5.98157
DZ-BM1-94	4.8254	0.0408283	0.318891	0.00245773	0.910887	0.109746	0.000383181	1784.31	24.0256	1789.34	14.2332	1795.18	12.7133	143.558	0.616811	0.605479
DZ-BM1-96	4.6372	0.0560753	0.309825	0.00326378	0.87114	0.108552	0.000644562	1739.85	32.126	1755.99	20.2014	1775.24	21.6703	134.999	0.82927	1.99378
DZ-BM1-98	4.44554	0.0553027	0.305306	0.00357156	0.940373	0.105606	0.00044686	1717.57	35.2773	1720.87	20.6243	1724.87	15.5424	134.634	0.679083	0.423144
DZ-BM1-99	4.28153	0.0556977	0.299725	0.0032408	0.831174	0.103604	0.000749372	1689.94	32.1477	1689.82	21.4167	1689.64	26.6863	101.941	0.800176	-0.0178145
DZ-BM1-100	4.15045	0.0230806	0.294564	0.00132289	0.807591	0.102191	0.000335142	1664.3	13.1749	1664.3	9.1005	1664.28	12.1355	180.822	0.73489	-0.000880516
Standard run with DZ-BM1: Sri Lanka Zircon
SL Zircon	0.752707	0.0175249	0.0926249	0.00190016	0.881116	0.0589382	0.000648927	571.042	11.2108	569.794	10.1527	564.795	23.985	557.463	0.232043	-1.10618
SL Zircon	0.753125	0.0204276	0.0924486	0.00214049	0.853614	0.0590834	0.000834784	570.002	12.6308	570.036	11.8315	570.19	30.7868	551.3	0.228488	0.0328826
SL Zircon	0.734731	0.0146673	0.0901512	0.00140528	0.780853	0.0591093	0.000737155	556.431	8.30987	559.326	8.5852	571.124	27.134	513.851	0.2278	2.57271
SL Zircon	0.730589	0.0118938	0.0904645	0.000718105	0.487598	0.0585725	0.00083251	558.284	4.24516	556.899	6.97844	551.236	31.0689	546.435	0.223475	-1.27855
SL Zircon	0.729634	0.0182604	0.0905013	0.00206038	0.909677	0.0584721	0.000607762	558.501	12.1798	556.338	10.7199	547.475	22.6618	506.537	0.230183	-2.01409
SL Zircon	0.754666	0.0144725	0.0922605	0.00136442	0.771154	0.0593249	0.000724315	568.892	8.05266	570.928	8.37496	579.03	26.5284	478.91	0.228344	1.75076
SL Zircon	0.753832	0.0212099	0.0928179	0.00169134	0.647645	0.0589036	0.00126278	572.181	9.97705	570.445	12.2796	563.513	46.6745	516.279	0.221255	-1.53812
SL Zircon	0.744476	0.0389647	0.0916633	0.00471692	0.983201	0.0589053	0.000562726	565.367	27.8541	565.014	22.6806	563.576	20.8161	526.315	0.218824	-0.317764
SL Zircon	0.72577	0.0166115	0.089348	0.00169759	0.830113	0.0589132	0.000751866	551.68	10.0458	554.067	9.77369	563.869	27.8151	507.566	0.226403	2.16168
SL Zircon	0.747906	0.0173529	0.0919067	0.00141421	0.663197	0.05902	0.00102491	566.804	8.34925	567.009	10.0806	567.853	37.7827	535.842	0.235801	0.184873
SL Zircon	0.732662	0.0121191	0.0902892	0.000986505	0.660536	0.0588527	0.000730894	557.247	5.83278	558.114	7.10212	561.633	27.0465	572.089	0.227855	0.780931
SL Zircon	0.740492	0.0124447	0.0911737	0.000842976	0.55015	0.0589047	0.000826675	562.475	4.98012	562.693	7.26014	563.553	30.5638	439.916	0.218034	0.191289
SL Zircon	0.74823	0.0267122	0.0920055	0.00305952	0.931461	0.0589821	0.000766139	567.387	18.0612	567.197	15.5149	566.455	28.2751	511.777	0.230109	-0.164491
SL Zircon	0.742755	0.0177737	0.0916303	0.00159426	0.72709	0.0587902	0.00096584	565.172	9.4146	564.012	10.3556	559.344	35.8417	516.087	0.224229	-1.04185
SL Zircon	0.741275	0.0142786	0.0910207	0.00100085	0.570851	0.059066	0.000934151	561.571	5.91365	563.149	8.3263	569.552	34.3988	532.396	0.227281	1.40123
SL Zircon	0.744917	0.014213	0.0916507	0.00119209	0.681701	0.0589483	0.00082289	565.292	7.03952	565.271	8.27074	565.165	30.407	547.392	0.23083	-0.0224893
SL Zircon	0.743706	0.0180595	0.091531	0.00161129	0.72494	0.0589294	0.000985683	564.585	9.51605	564.566	10.5164	564.467	36.4556	500.808	0.228912	-0.0209242
SL Zircon	0.747704	0.0211414	0.092559	0.00228231	0.872069	0.0585882	0.000810708	570.653	13.4663	566.891	12.2829	551.814	30.2468	547.424	0.229914	-3.41403
SL Zircon	0.723381	0.0168947	0.0891594	0.00125597	0.603153	0.0588435	0.00109618	550.564	7.43372	552.661	9.95414	561.313	40.6377	498.623	0.238229	1.91495
SL Zircon	0.734855	0.0151347	0.0904313	0.00100731	0.540844	0.0589361	0.00102097	558.087	5.95501	559.399	8.85815	564.716	37.7298	482.241	0.220582	1.17379
SL Zircon	0.754016	0.0160689	0.0927711	0.00168653	0.853056	0.0589477	0.000655529	571.905	9.94909	570.552	9.30217	565.142	24.2532	583.75	0.232913	-1.19665
SL Zircon	0.747514	0.012749	0.0919469	0.00119255	0.760473	0.0589632	0.000653026	567.041	7.04035	566.781	7.40777	565.717	24.1228	528.254	0.224971	-0.234075
SL Zircon	0.740762	0.0126182	0.0911085	0.00109174	0.703466	0.0589683	0.000713904	562.09	6.45016	562.85	7.36019	565.945	26.3903	534.691	0.240423	0.681128
SL Zircon	0.74162	0.01902	0.0914809	0.00118078	0.503281	0.0587963	0.00130303	564.289	6.97382	563.351	11.089	559.562	48.2968	493.136	0.23628	-0.844864
SL Zircon	0.736105	0.0178586	0.0912085	0.000731741	0.330685	0.0585333	0.00134018	562.681	4.32283	560.13	10.4449	549.761	50.0145	444.897	0.224042	-2.35005
SL Zircon	0.749106	0.0221774	0.09195	0.00209507	0.769626	0.0590868	0.0011169	567.059	12.3684	567.706	12.8745	570.286	41.1371	475.692	0.218194	0.565881
SL Zircon	0.740573	0.0184084	0.090927	0.00138458	0.612603	0.0590709	0.00116055	561.017	8.18167	562.74	10.7388	569.732	42.7443	532.745	0.226688	1.52966
SL Zircon	0.73805	0.0142675	0.0910969	0.0014763	0.838315	0.0587599	0.000619281	562.021	8.72226	561.267	8.33525	558.211	23.0217	497.496	0.223464	-0.682525
SL Zircon	0.753046	0.0169379	0.0925754	0.0010802	0.518763	0.0589963	0.00113445	570.75	6.37337	569.99	9.81069	566.978	41.9066	542.088	0.226588	-0.665272
Braintree	0.511688	0.0409716	0.0677472	0.00200185	0.369031	0.0547788	0.00407662	422.569	12.086	419.583	27.5218	403.183	166.666	166.789	0.833142	-4.80818
Braintree	0.506285	0.100476	0.0668712	0.0131561	0.991334	0.0549104	0.00143154	417.278	79.4946	415.948	67.7557	408.554	58.3279	343.377	0.667264	-2.13528
Braintree	0.507918	0.0360467	0.0681509	0.00232609	0.480932	0.0540531	0.00336335	425.006	14.0382	417.048	24.2738	373.239	140.079	116.975	0.826204	-13.8698
Braintree	0.468444	0.060093	0.0656272	0.00233232	0.277037	0.0517693	0.00638114	409.757	14.1092	390.114	41.5582	275.213	282.6	87.2094	0.886139	-48.8874
Published Standard Ages
WRS-1348, 526.26 ± 0.70 (Pointon et al., 2012); Plešovice, 337.13 ± 0.37, (Sláma et al., 2008); Temora 2, 416.8 ± 1.3 (Black et al., 2003);
Sri Lanka zircon, 563.5 ± 2.3 Ma (Gehrels et al., 2008); Braintree diorite, 419.26 ± 0.39 Ma (Black et al., 2004)

## Sheet: Table S4
Table S4: Summary of published ages of standards used in Laser Ablation Inductively Coupled Mass Spectrometry and the ages yielded for those standards in this study. Measured ages are concordia ages of all runs of each standard, except for the apatites analysed 02/08/2017, which are lower intercept ages. Measured ages for secondary standards only. TCD = Trinity College Dublin; Arizona = Universit…
Date Laboratory	Sample(s)	Primary Standard	Secondary Standard	Published age (2σ)/Ma	Measured age (2σ)/Ma	Published age Reference
02/08/2016 TCD	KR1, SH3B	Madagascar apatite	-	473.5 ± 0.7	-	Thomson et al. (2012); in-house standard
		-	McClure Mountain syenite	523.51 ± 2.09	517.8 ± 4.6	Schoene & Bowring (2006)
		-	Durango apatite	31.44 ± 0.18	31.81 ± 0.33	McDowell et al. (2005)
25/04/2017 TCD	DZ-SH1, DZ-SH2	91500 Zircon	-	1065.4 ± 0.6	-	Wiedenbeck et al. (1995)
		-	WRS-1348	526.26 ± 0.70	519.9 ± 4.6	Pointon et al. (2012)
		-	Plešovice	337.13 ± 0.37	338.4 ± 2.3	Sláma et al. (2008)
		-	Temora 2	416.8 ± 1.3	414.1 ± 2.8	Black et al. (2003)
26/04/2017 TCD	SH5B, SH5C	91500 Zircon	-	1065.4 ± 0.6	-	Wiedenbeck et al. (1995)
		-	WRS-1348	526.26 ± 0.70	529.6 ±5.1	Pointon et al. (2012)
		-	Plešovice	337.13 ± 0.37	341.4 ±4.8	Sláma et al. (2008)
		-	Temora	416.8 ± 1.3	415.0 ±3.1	Black et al. (2003)
05/04/2017 TCD	SH5A	Plešovice	-	337.13 ± 0.37	-	Sláma et al. (2008)
		-	WRS-1348	526.26 ± 0.70	528.3 ±2.7	Pointon et al. (2012)
		-	91500 Zircon	1065.4 ± 0.6	1055.3 ±5.6	Wiedenbeck et al. (1995)
		-	Temora	416.8 ± 1.3	416.2 ±3.9	Black et al. (2003)
30/04/2014 Arizona	DZ-BM1	Sri Lanka Zircon	Sri Lanka Zircon	563.5 ± 3.2	562.5 ± 1.3	Gehrels et al. (2008)
		-	Braintree diorite	419.26 ± 0.39	too few data	Black et al. (2004)
28/08/2014 Arizona	DZ-SH3	Sri Lanka Zircon	Sri Lanka Zircon	563.5 ± 3.2	563.8 ± 1.4	Gehrels et al. (2008)
		-	Braintree diorite	419.26 ± 0.39	422.0 ±6.7	Black et al. (2004)
12/05/2017 Arizona	SH5B, SH5C	Sri Lanka Zircon	Sri Lanka Zircon	563.5 ± 3.2	556.9 ± 5.5	Gehrels et al. (2008)
		-	Duluth Gabbro	1099 ± 2	1097.2 ±6.6	Paces and Miller (1993)
		-	Braintree diorite	419.26 ± 0.39	420.6 ±8.6	Black et al. (2004)

## Sheet: Table S5
Table S5: Standards run in-session during major element analysis of metabasite samples of this study at the University of Leicester X-Ray Flourescence facility. Data marked "<" indicate a mesaured value below the lower limit of detection for the XRF run in question. ND: No Data available. The recommended concentrations are shown for comparison.
25th August 2016: Run with samples KR1, KR2, SH1A, SH1B, SH2, SH3A, SH3B, SH4, SH5A (wt%)
Standard	SiO2	TiO2	Al2O3	Fe2O3	MnO	MgO	CaO	Na2O	K2O	P2O5	SO3	Total
ARAL2O3	0.100903	0.003	101.708	<0.001	<0.001	0.009	0.016	0.057	0.005	0.009	0.035	101.931
ARSiO2	102.158	0.0106733	0.106	<0.001	<0.001	0.02	0.045	0.122752	0.012	0.012919	0.085	102.467
BCS372/1	19.6067	0.245486	4.96272	3.36422	0.0403652	1.20702	66.3577	0.165496	0.653681	0.0785905	3.00686	99.6889
BCS375	68.0434	0.349017	19.5958	<0.001	0.002	0.02	0.780357	10.4712	0.653681	0.0269146	0.054	99.9964
BCS376	67.8637	0.0074713	17.495	<0.001	0.002	0.021	0.452651	2.81563	11.1657	0.0139956	0.034	99.8642
BH-1	69.3068	0.378902	14.0966	5.82939	0.141796	2.43996	3.62449	3.70339	0.739776	0.0742842	0.097	100.432
MRG-1	39.7064	4.01849	8.29735	18.6027	0.161461	13.2264	15.2246	0.757338	0.167938	0.0678247	0.204135	100.435
NIM-D	38.5292	0.0202793	0.192	17.2932	0.240121	43.3034	0.257562	<0.007	0.007	0.009	0.034	99.7954
WS-1	51.922	2.26594	13.671	13.6642	0.178021	4.91083	8.70448	2.81125	1.15537	0.306826	0.153377	99.7433
Blank	0.0735752	0.00533665	0.104566	0.415652	0.00310502	0.0907013	0.0186321	0.168784	0.00425159	0.00861266	0.0617923	0.95501
1st March 2017: Run with samples CSD5, CSD6 (wt%)
Standard	SiO2	TiO2	Al2O3	Fe2O3	MnO	MgO	CaO	Na2O	K2O	P2O5	SO3	Total
ARAL2O3	0.02	0.01	104.406	0.01	<0.001	0.06	0.02	0.05	0.005	0.0057886	0.0150642	104.588
ARSiO2	100.684	0.01	<0.07	0.004	<0.001	0.01	0.02	0.09	0.005	0.0057886	0.0160057	100.793
BCS372/1	19.4843	0.264448	5.06032	3.3835	0.0353061	1.25545	65.1631	0.157778	0.724416	0.0781462	2.78499	98.3918
BCS375	67.1451	0.367504	19.8701	0.114227	0.002	0.03	0.795851	10.4486	0.734023	0.0231544	0.0263623	99.5613
BCS376	67.0817	0.00777787	17.6721	0.0994566	0.003	0.04	0.465133	2.83217	11.2534	0.0135067	0.0273038	99.4937
BH-1	67.8413	0.398616	14.0337	5.73008	0.134359	2.41983	3.42709	3.61616	0.799355	0.0646394	0.0225963	98.4877
MRG-1	39.1042	3.86366	8.29377	18.4172	0.155935	13.3849	14.6754	0.733032	0.181584	0.0627099	0.176063	99.0485
NIM-D	38.2891	0.0243058	0.21	16.9805	0.232432	44.5929	0.284302	<0.007	0.011	0.00868291	0.0244793	100.537
WS-1	50.8685	2.47239	13.5681	13.4463	0.171627	4.965	8.46619	2.75083	1.27301	0.295219	0.0659058	98.3431
Blank	0.0916497	0.0058334	0.174494	0.0226485	0.00196145	0.117515	0.0357794	0.106819	0.00480382	0.0057886	0.0160057	0.583298
28th March 2017: Run with samples CSD1, CSD2, CSD3, CSD4, HC1, PC1, SH5B, SH5C, SH5D, SH5E (wt%)
Standard	SiO2	TiO2	Al2O3	Fe2O3	MnO	MgO	CaO	Na2O	K2O	P2O5	SO3	Total
ARAL2O3	0.017826	0.00701399	106.262	0.00695312	<0.001	0.0483549	0.0188893	0.0486157	0.00693488	0.00705085	0.0160124	106.44
ARSiO2	100.806	0.00601199	<0.007	0.00496652	<0.001	0.00604436	0.0198835	0.0911545	0.00693488	0.00604359	0.018014	100.914
BCS372/1	19.5264	0.254508	5.10664	3.39511	0.0358465	1.25823	66.0052	0.174206	0.703395	0.0795739	2.90325	99.4424
BCS375	67.121	0.359718	20.0801	0.113237	<0.001	0.0251848	0.755572	10.3825	0.706367	0.0241743	0.0310241	99.5998
BCS376	67.1299	0.00801599	17.9895	0.098337	0.00298721	0.0302218	0.449367	2.8501	11.3544	0.015109	0.0290225	99.9569
BH-1	70.0019	0.408815	15.1282	5.7701	0.138407	2.51143	3.68143	3.92065	0.854971	0.0705085	0.0250194	102.511
MRG-1	39.0836	3.93986	8.39824	18.2728	0.157326	13.5867	14.849	0.735313	0.176344	0.0644649	0.183142	99.4468
NIM-D	38.3507	0.023046	0.206661	17.0063	0.234994	45.6349	0.278369	<0.007	0.0108977	0.00805812	0.0260202	101.663
WS-1	50.8626	2.508	13.7545	13.4652	0.173258	4.99466	8.55288	2.76097	1.21063	0.301172	0.0730567	98.657
Blank	0.0980432	0.00701399	0.182701	0.0218527	<0.001	0.107791	0.0357903	0.120526	0.00495348	0.00604359	0.0190148	0.604726
Recommended concentrations for the standards (wt%)
Standard	SiO2	TiO2	Al2O3	Fe2O3	MnO	MgO	CaO	Na2O	K2O	P2O5	SO3	Total
ARAL2O3	0	0	99.95	0	0	0	0	0	0	0	ND	99.95
ARSiO2	99.995	0	0	0	0	0	0	0	0	0	ND	99.995
BCS372/1	20.3	0.27	5.37	3.42	0.03	1.31	65.3	0.1	0.75	0.07	2.95	99.87
BCS375	67.1	0.38	19.8	0.12	0.003	0.5	0.89	10.4	0.79	0	0	99.983
BCS376	67.1	0	17.7	0.1	0.002	0.03	0.54	2.83	11.2	0	ND	99.502
BH-1	68.07	0.43	14.35	5.81	0.14	2.5	3.53	3.94	0.87	0.07	0	99.71
MRG-1	39.59	3.818	8.57	18.16	0.172	13.72	14.9	0.75	0.182	0.081	0.153	100.096
NIM-D	38.6	0.02	0.3	16.8	0.218	43.11	0.28	0.04	0.01	0.01	0.2	99.588
WS-1	51.31	2.54	14.04	13.51	0.18	5.31	8.87	3.1	1.36	0.3	0	100.52

## Sheet: Table S6
Table S6: Multiple analyses of standard WS-1 for major elements by X-Ray Fluorescence, at the University of Leicester using the same method employed in this study. These data were used to determine the 2σ estimated uncertainties for samples of this study. WS-1 is an in-house basaltic sample, from the Great Whin Sill (UK), chosen for its compositional similarity to metabasites of this study.
Multiple XRF analyses of standard WS-1 (Whin Sill, UK) at University of Leicester (wt%)
Date Analysed	SiO2	TiO2	Al2O3	Fe2O3	MnO	MgO	CaO	Na2O	K2O	P2O5	SO3	Total
2017-10-31	52.3255	2.5038	14.2395	13.5023	0.172802	5.42829	8.79205	2.86747	1.32307	0.312766	0.153189	101.621
2017-10-05	52.3927	2.48962	14.2412	13.5103	0.173144	5.42287	8.79338	2.82807	1.32813	0.307849	0.149818	101.637
2017-10-03	52.3017	2.50298	14.2078	13.515	0.173907	5.42167	8.79753	2.80523	1.32372	0.307933	0.159327	101.517
2017-09-28	52.1317	2.50548	14.1784	13.5384	0.17302	5.38757	8.83316	2.83772	1.3268	0.309761	0.169463	101.392
2017-09-27	50.5701	2.52483	13.6456	13.5868	0.172442	5.2192	8.63476	3.02081	1.30142	0.309632	0.179851	99.1655
2017-09-25	51.6903	2.52513	13.9601	13.5638	0.169903	5.34807	8.81776	2.81318	1.32219	0.307719	0.174951	100.693
2017-08-14	51.8926	2.51874	13.943	13.5498	0.171049	5.37597	8.77955	2.83704	1.32891	0.30664	0.160037	100.863
2017-08-09	51.5261	2.51767	13.9798	13.4593	0.168932	5.36069	8.79478	2.82307	1.31602	0.306794	0.16739	100.421
2017-08-08	51.5261	2.51767	13.9798	13.4593	0.168932	5.36069	8.79478	2.82307	1.31602	0.306794	0.16739	100.421
2017-08-01	51.997	2.52003	13.9997	13.5503	0.170891	5.38316	8.80485	2.8351	1.32492	0.305798	0.155997	101.048
2017-07-19	51.6568	2.52162	13.9102	13.5703	0.169851	5.3721	8.78829	2.81879	1.32244	0.306082	0.164734	100.601
2017-07-13	51.5701	2.52886	13.9762	13.5819	0.171232	5.41269	8.72263	2.85187	1.32244	0.307618	0.163525	100.609
2017-07-06	51.3578	2.50819	13.7384	13.5622	0.170027	5.34224	8.7579	2.78692	1.3121	0.303087	0.0749969	99.9139
2017-06-28	51.42	2.51155	13.7355	13.56	0.169661	5.36594	8.75861	2.77149	1.30786	0.302279	0.0743585	99.9772
2017-06-06	51.4863	2.51415	13.8034	13.5863	0.170856	5.34941	8.75029	2.77973	1.3153	0.301263	0.0679414	100.125
2017-05-30	51.4242	2.51808	13.8001	13.5728	0.169837	5.37849	8.7598	2.77657	1.31353	0.300113	0.0652138	100.079
2017-05-17	51.641	2.51516	13.8008	13.5607	0.170642	5.35899	8.73628	2.77448	1.30998	0.302949	0.0658555	100.237
2017-04-27	51.3717	2.51351	13.7043	13.5647	0.169669	5.3521	8.74427	2.78603	1.31358	0.300938	0.0642244	99.8851
2017-04-20	50.9722	2.51223	13.6105	13.5612	0.16939	5.31303	8.73955	2.74745	1.29452	0.29629	0.0635667	99.2799
Statistics
	SiO2	TiO2	Al2O3	Fe2O3	MnO	MgO	CaO	Na2O	K2O	P2O5	SO3
Mean (wt%)	51.6449	2.51417	13.9186	13.545	0.170852	5.36596	8.76843	2.82021	1.317	0.305384	0.128517
2 standard deviations (wt%)	0.919104	0.0186114	0.394535	0.077036	0.00304741	0.0934076	0.088081	0.115684	0.0184159	0.00801408	0.0960791
2 relative standard deviations (%)	1.77966	0.740258	2.83458	0.56874	1.78365	1.74074	1.00452	4.10197	1.39832	2.62426	74.7597
Recommended concentrations for standard WS-1 (wt%)
	SiO2	TiO2	Al2O3	Fe2O3	MnO	MgO	CaO	Na2O	K2O	P2O5	SO3
	51.31	2.54	14.04	13.51	0.18	5.31	8.87	3.1	1.36	0.3	0

## Sheet: Table S7
Table S7: Multiple analyses of a basaltic sample by X-Ray Fluorescence, at Royal Holloway Univeristy of London, using the same method employed in this study. Each analysis from a different pressed powder pellet. The high 2σ for Cr is a function of minor Cr-spinel heterogeneity in the analysed powder. These data were used to determine the 2σ estimated uncertainties for samples of this study appear…
Multiple runs of a basaltic sample (ppm)
	Ni	Co	Cr	V	Sc	Cu	Zn	S	F	Cl	Ga	Pb	Sr	Rb	Ba	Zr	Nb	Ta	Mo	Th	U	Y	La	Ce	Nd	Sm	Yb	W	Cs
	120.09	43.5741	421.609	306.322	30.8741	54.394	80.6427	3.01447	717.183	164.92	17.9107	1.70498	479.986	23.2107	398.453	171.143	49.2454	2.65248	1.58213	3.1756	0.946949	26.0507	34.4925	73.4492	36.4226	8.76646	2.10954	31.6381	-0.0332234
	117.168	42.832	438.505	307.056	32.0634	53.8071	80.7179	3.16859	726.34	165.905	17.3367	1.75792	478.873	23.2115	397.923	171.031	49.1586	3.45081	1.66745	2.97962	1.18632	25.9141	35.5431	73.067	35.7869	6.74412	2.11459	36.1729	0.404111
	120.712	44.1161	430.162	305.427	31.1454	54.3441	80.4274	3.1222	726.969	169.101	18.0371	1.87837	480.189	23.4033	403.337	171.724	49.1942	3.09372	1.69077	3.13344	0.833694	26.0487	36.6951	75.4193	38.4173	7.01713	2.52195	32.2115	0.177746
	119.967	42.8039	433.873	306.321	31.3175	54.1031	81.257	3.20437	708.524	162.896	17.4217	2.02458	480.294	23.1889	399.42	171.789	49.2887	2.99983	1.60086	3.01092	0.664042	25.8561	35.7372	75.1366	36.7604	7.10732	2.45951	33.3116	0.806467
	120.527	42.3582	437.234	308.609	31.0604	54.4874	81.0002	4.9699	724.047	176.602	17.9992	1.81452	481.205	23.3722	403.832	171.699	49.5585	2.22515	1.83848	3.39272	0.730742	25.7611	34.8915	74.1304	37.2407	5.98913	2.30602	34.0417	0.53026
Statistics
Mean (wt%)	119.693	43.1369	432.277	306.747	31.2922	54.2272	80.8091	3.49591	720.613	167.885	17.7411	1.83607	480.11	23.2773	400.593	171.477	49.2891	2.8844	1.67594	3.13846	0.87235	25.9261	35.4719	74.2405	36.9256	7.12483	2.30232	33.4752	0.377072
2 standard deviations (wt%)	2.88801	1.4001	13.5715	2.38042	0.919488	0.548717	0.647112	1.65415	15.5853	10.7267	0.66974	0.247144	1.66883	0.203609	5.57716	0.720017	0.317065	0.93078	0.202856	0.327949	0.411197	0.250701	1.6934	2.05133	1.97519	2.0351	0.381273	3.54924	0.645485

## Sheet: Table S8
Table S8: Samples and in-session standards of this study determined by Inductively Coupled Atomic Emission Spectrometry at the Earth Sciences Department, Royal Holloway University of London. Sample SH-P12-1 is a meta-igneous boulder found in marbles immediately underlying the Kingston Peak Formation of the Silurian Hills, 35° 32.138' N, 116° 06.018' W (mapping unit P12, Kupfer, 1960). Loss on ign…
Samples of this study
	wt %											ppm											wt%
	SiO2	Al2O3	Fe2O3	MgO	CaO	Na2O	K2O	TiO2	P2O5	MnO	total	Ba	Sr	Y	Zr	Co	Cr	Cu	Ni	Sc	V	Zn	LOI
SH-P12-1	58.8384	16.3274	5.98183	4.60133	5.03216	3.24978	2.73046	0.96645	0.347845	0.0550935	98.1308	886.922	710.919	22.3088	226.149	15.8658	171.947	46.9297	50.1213	20.1533	137.837	165.851	ND
SH5E	48.8987	16.0301	9.24448	7.8168	8.51581	2.91149	2.23769	1.30766	0.319647	0.210252	97.4926	459.21	531.239	24.308	118.876	33.5773	341.433	12.4063	116.189	31.6464	227.702	69.7036	2.1
CSD5	48.8418	14.2423	12.7513	6.57654	8.03182	3.50164	1.0103	3.08528	0.339815	0.24091	98.6217	283.563	491.347	31.4681	153.637	57.2457	141.851	75.4799	57.5146	47.9436	357.887	140.99	1.13
CSD5	48.8322	14.2363	12.7494	6.57223	8.02775	3.50117	1.00513	3.08688	0.336516	0.240832	98.5884	283.329	491.362	31.3439	153.95	57.2574	141.257	75.6051	57.5028	48.3103	357.995	140.754	1.13
CSD5	48.8012	14.2341	12.7497	6.56646	8.03314	3.50135	1.0078	3.08588	0.339265	0.240912	98.5598	283.351	491.116	31.3527	153.515	57.2776	141.415	75.7166	57.7119	48.1348	357.635	141.484	1.13
CSD5 (average)	48.8251	14.2376	12.7501	6.57175	8.0309	3.50139	1.00774	3.08601	0.338532	0.240885	-	283.414	491.275	31.3882	153.701	57.2603	141.508	75.6005	57.5764	48.1296	357.839	141.076	-
CSD5 (2 standard deviations)	0.0212385	0.00425835	0.00100424	0.00505737	0.0028087	0.000235353	0.00258468	0.00081053	0.00176745	4.56039e-05	-	0.129246	0.137763	0.0693343	0.224269	0.0161289	0.307732	0.118374	0.117497	0.183375	0.184698	0.372538	-
Standards run with samples of this study
KC 10	47.9584	17.4119	9.89702	7.69596	11.8401	2.49306	0.277112	0.834529	0.0767376	0.13459	98.6194	126.099	357.7	13.2479	40.4238	43.4028	330.393	174.106	104.056	32.9575	220.153	60.3933	ND
KC 11	55.6386	16.4305	8.7061	3.98613	6.94251	3.29868	2.17557	1.09193	0.324658	0.138052	98.7328	490.684	370.133	27.8822	145.074	27.1959	110.356	108.029	280.204	23.7979	210.96	121.127	ND
KC 12	68.9469	15.3047	2.8412	1.24609	1.78483	4.15601	4.25722	0.345428	0.124309	0.0452928	99.052	1627.31	462.03	6.01696	158.6	8.17009	24.4564	27.336	14.3987	3.85602	30.1142	42.2046	ND
BHVO-1	49.9387	13.7595	12.1953	7.24611	11.3924	2.29172	0.503962	2.73245	0.26639	0.166075	100.493	139.322	403.005	27.6925	179.528	45.1355	288.987	136.527	120.894	31.7623	316.91	105.283	ND
Recommended concentrations for the standards
KC 10	48	17.4	9.9	7.7	11.9	2.4	0.2	0.84	0.09	0.13	98.56	126	360	13	38	45	330	170	104	33	220	60	ND
KC 11	55.55	16.51	8.71	3.99	6.86	3.3	2.15	1.1	0.32	0.14	98.63	491	370	28	145	27	111	108	280	24	210	119	ND
KC 12	69	15.2	2.8	1.2	1.8	4.2	4.3	0.35	0.12	0.05	99.02	1600	460	6	160	8	25	27	15	4	30	42	ND
BHVO-1	49.94	13.8	12.23	7.23	11.4	2.26	0.52	2.71	0.273	0.168	100.531	139	403	27.6	179	45	289	136	121	31.8	317	105	ND

## Sheet: Table S9
Table S9: Samples and in-session standards of this study determined by Inductively Coupled Mass Spectrometry at the Earth Sciences Department, Royal Holloway University of London. Sample SH-P12-1 is a meta-igneous boulder found in marbles immediately underlying the Kingston Peak Formation of the Silurian Hills, 35° 32.138' N, 116° 06.018' W (mapping unit P12, Kupfer, 1960). ND: No Data available.…
Samples of this study (ppm)
	Nb	Mo	Cs	Hf	Ta	Pb	Th	U	La	Ce	Pr	Nd	Sm	Eu	Gd	Tb	Dy	Ho	Er	Tm	Yb	Lu
SH-P12-1	11.5106	0.805606	6.80616	5.93852	0.856796	9.95174	7.47862	1.50578	42.1539	85.0322	9.31652	38.5438	6.82626	1.85844	5.95763	0.78026	4.43363	0.868457	2.23294	0.299397	1.80918	0.292886
SH5E	8.50009	0.560356	1.53682	2.58964	0.590872	15.6043	1.66374	0.830797	14.9993	33.2418	4.63229	21.0682	4.66115	1.63504	4.5359	0.730561	4.27337	0.89344	2.40007	0.35719	2.07724	0.314151
CSD5	7.90098	0.808191	0.658942	3.61279	0.602843	11.4729	1.2033	0.62422	12.3352	31.2153	4.40373	21.2087	5.26265	1.87988	5.46977	0.928535	5.48071	1.1657	2.98112	0.433101	2.63021	0.400723
CSD5	7.91952	0.820611	0.629408	3.56023	0.607577	11.6717	1.11776	0.65367	12.2638	31.3562	4.44606	21.4284	5.13801	1.89752	5.38004	0.902585	5.41479	1.19475	3.09018	0.442329	2.63856	0.418095
CSD5 (average)	7.91025	0.814401	0.644175	3.58651	0.60521	11.5723	1.16053	0.638945	12.2995	31.2858	4.42489	21.3185	5.20033	1.8887	5.4249	0.91556	5.44775	1.18022	3.03565	0.437715	2.63439	0.409409
CSD5 (2 standard deviations)	0.0131093	0.00878252	0.0208837	0.0371653	0.00334796	0.140541	0.0604826	0.0208247	0.0504347	0.0996174	0.0299294	0.155382	0.0881348	0.0124783	0.0634486	0.0183494	0.0466103	0.0205451	0.0771166	0.00652503	0.0059075	0.0122837
Standards run with samples of this study (ppm)
KC 10	2.17147	0.495588	0.145991	1.40266	0.0183071	1.00504	0.0237434	0.178651	4.54323	9.16358	1.6303	6.80936	1.59189	0.748934	1.77686	0.314275	1.97454	0.432459	1.22589	0.175193	1.07935	0.157936
KC 11	11.7205	0.900957	50.3058	3.34248	6.03269	7.92207	2.31291	1.69177	22.977	49.734	6.0201	26.5662	5.18722	1.44483	5.10074	0.776799	4.49403	0.98724	2.68728	0.381622	2.17013	0.344223
KC 12	3.81627	0.643569	0.451664	3.71558	0.168028	10.9819	14.346	0.433629	37.1501	69.8812	7.18122	27.0566	3.2584	1.12749	2.09419	0.256384	1.17526	0.240413	0.802044	0.0783286	0.498035	0.0637127
BHVO-1	18.3139	1.08899	0.130611	4.37613	1.22724	2.51538	1.29207	0.428176	15.7674	39.0901	5.65972	25.3419	6.33594	2.0802	6.34477	0.946226	5.24541	0.986162	2.43105	0.344517	2.00135	0.276792
Recommended concentrations for the standards (ppm)
KC10	2.3	ND	0.15	1.4	<0.1	1	<0.1	0.22	4.3	9.2	1.6	6.8	1.7	0.75	1.9	ND	2	0.43	1.25	ND	1.1	0.16
KC11	12	ND	47	3.3	5	8	2.4	1.8	23	49	5.9	26.5	5.2	1.4	5	ND	4.45	1	2.7	ND	2.2	0.32
KC12	3.5	ND	0.42	3.5	<0.1	10	14	0.33	37	70	7.2	27	3.3	1.1	2.1	ND	1.2	0.25	0.8	ND	0.5	0.06
BHVO-1	19	1.02	0.13	4.38	1.23	2.6	1.08	0.42	15.8	39	5.7	25.2	6.2	2.06	6.4	0.96	5.2	0.99	2.4	0.33	2.02	0.291

[truncated: 3 more sheets: Table S10, Table S11, References]
